# Supplementary material for: Transition From Wild to Domesticated Pearl Millet (Pennisetum glaucum) Revealed in Ceramic Temper at Three Middle Holocene Sites in Northern Mali
Source: PubMed Central journal article supplement (PMC8550313; doi:10.1007/s10437-021-09428-8), 2021-03-16

Supplementary material for **Transition from wild to domesticated Pearl Millet (*Pennisetum glaucum*) revealed in ceramics tempers from three Middle Holocene sites in Northern Mali**

This supplement includes images of each sherd subjected to micro CTscanning and examples of extracted plants remains from the resulting high-resolution tomography. A brief typological characterization of each sherd is also provided. All remains are identified as pearl millet (*Pennisetum glaucum/violaceum*), unless otherwise indicated.

# MK36

## Sherd 1237

Pivoting impression A+B Fishnet with a  
curved edged spatula

Impression pivotante A+B Fishnet avec  
spatule à front courbe

(<https://lampea.cnrs.fr/cerafim/spip.php?article72>)

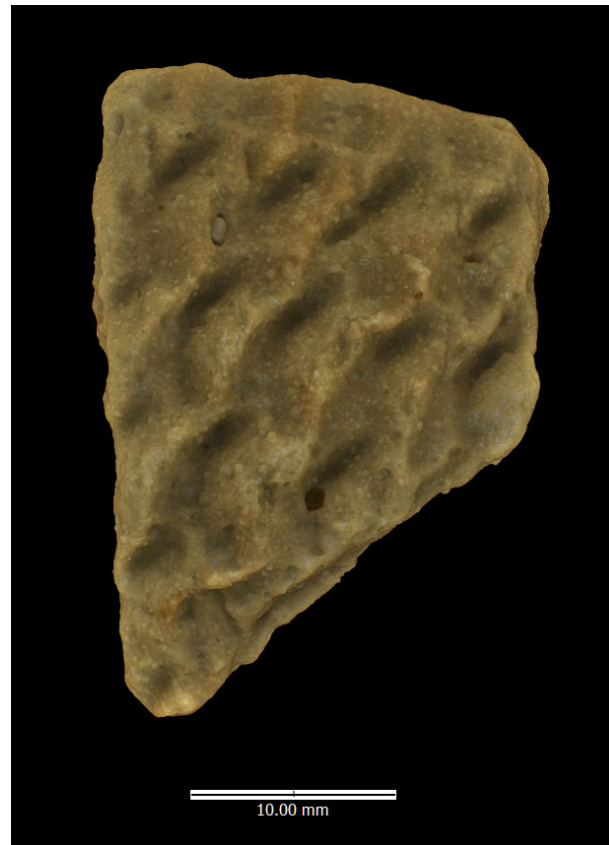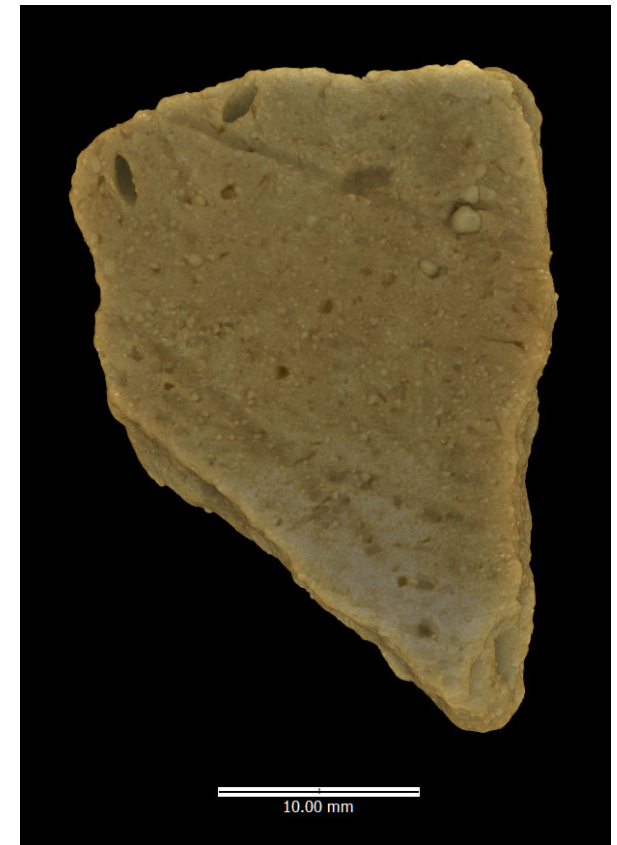

# Inclusion 1

Involucre base with torn peduncle

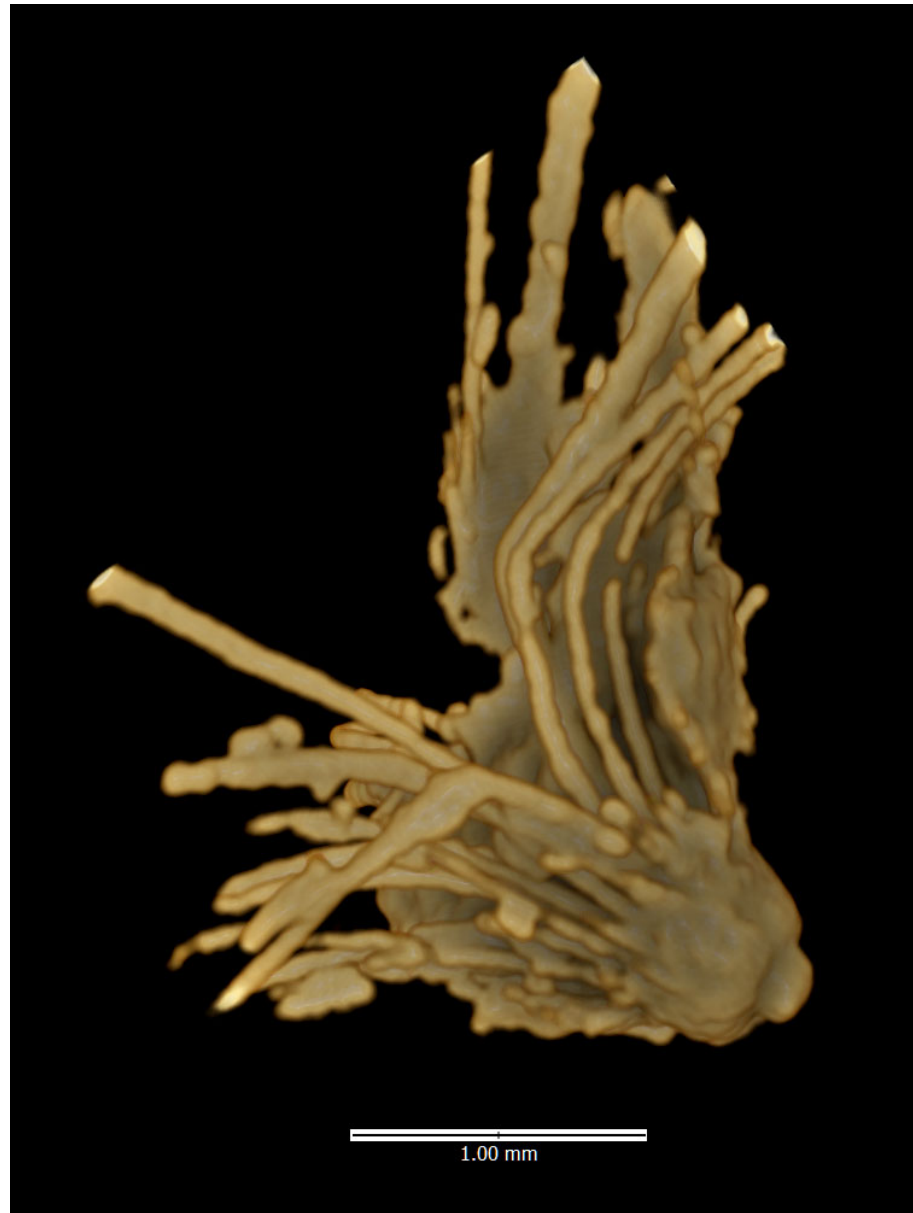

# Inclusion 3. Two views of spikelet

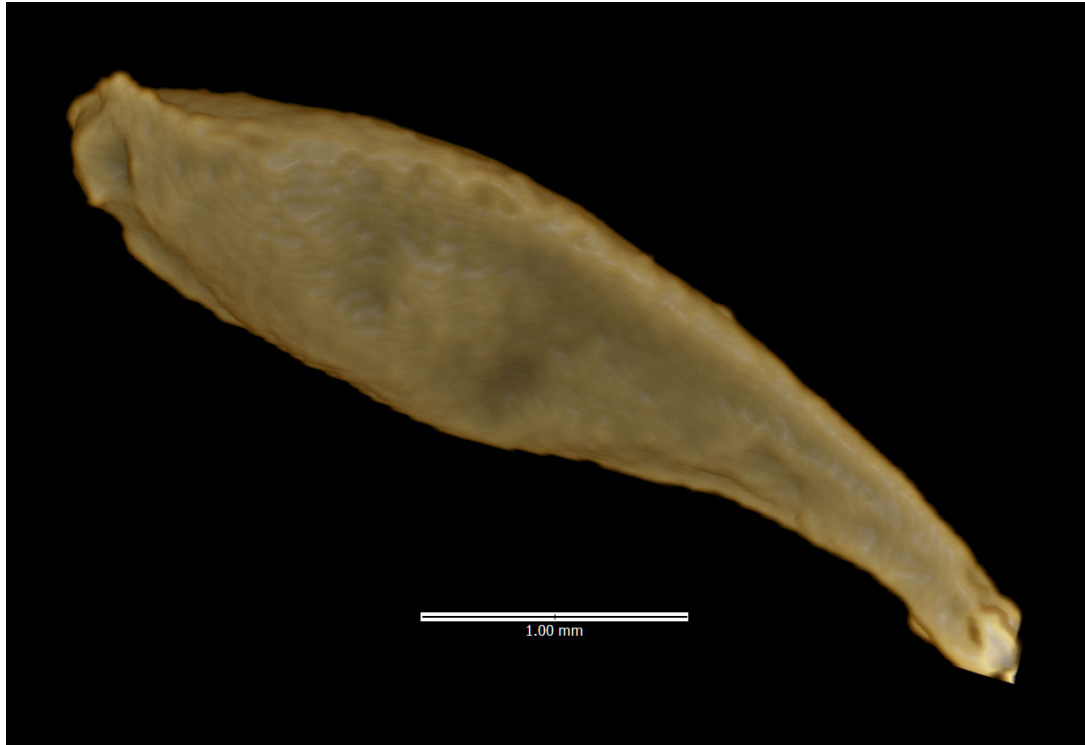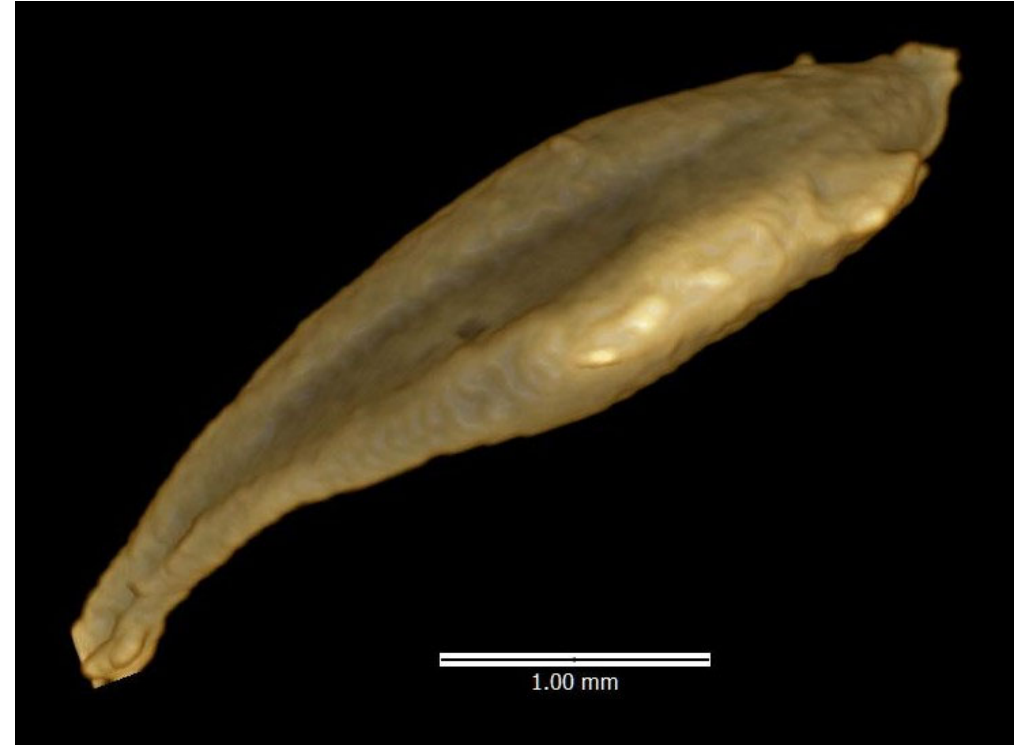

# Inclusion 11. Two views of spikelet, from paired spikelets

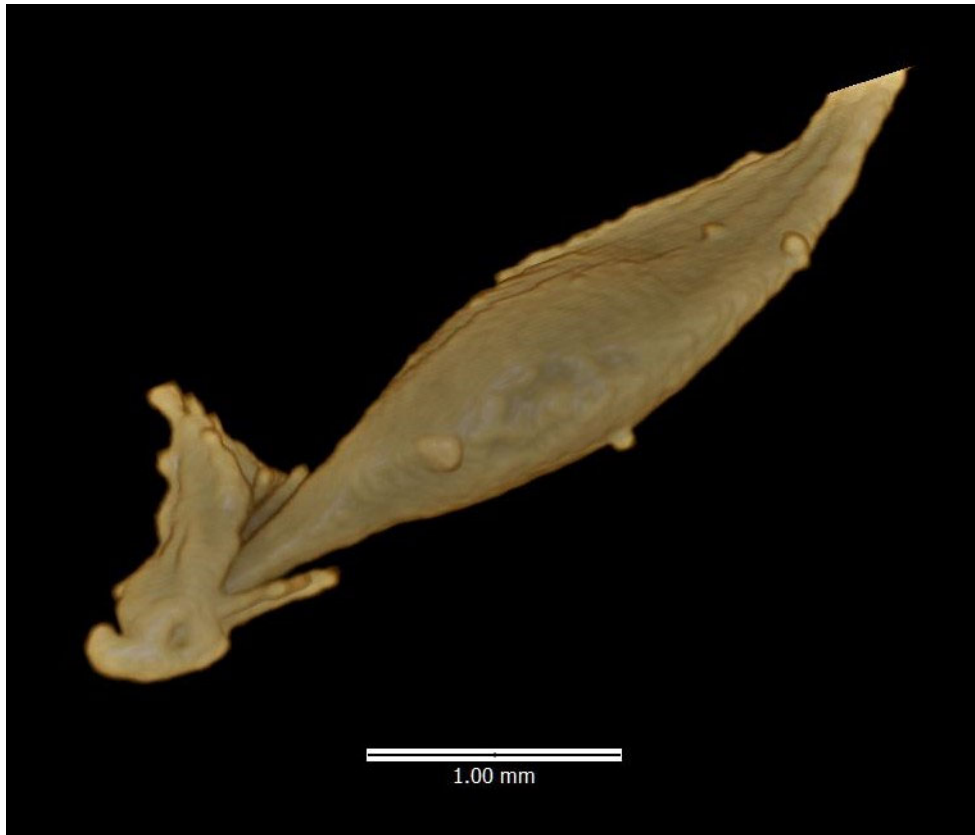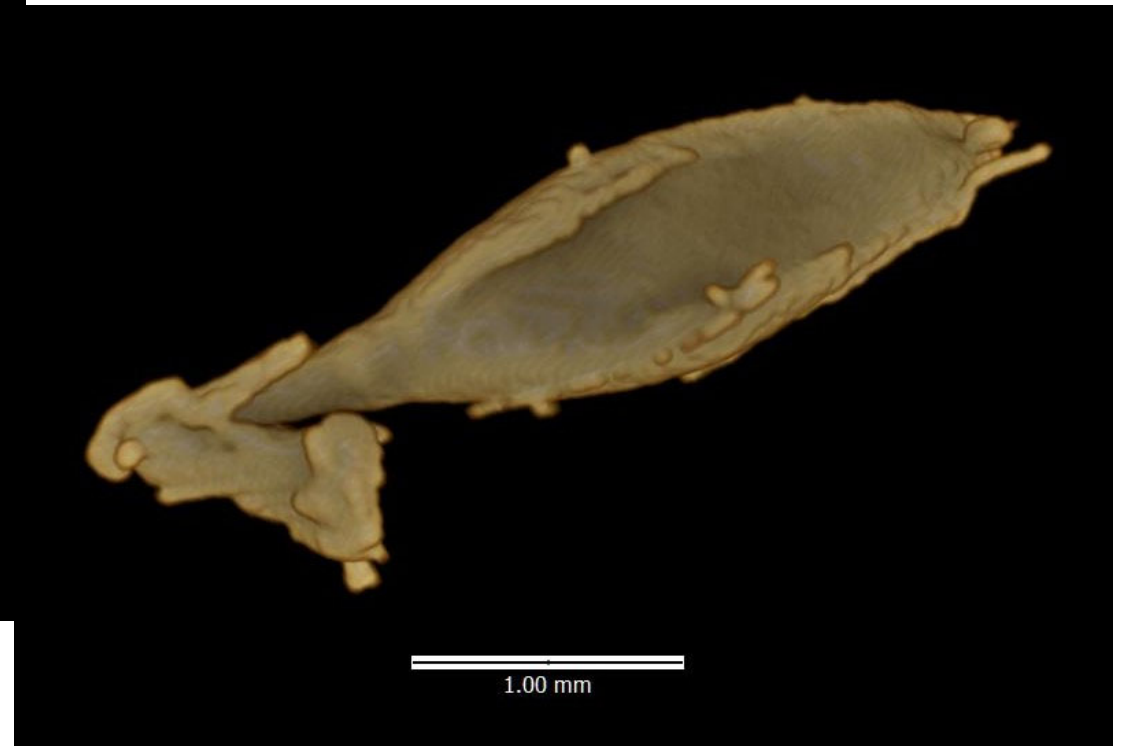

# Inclusion 12. Two views, spikelet fragment

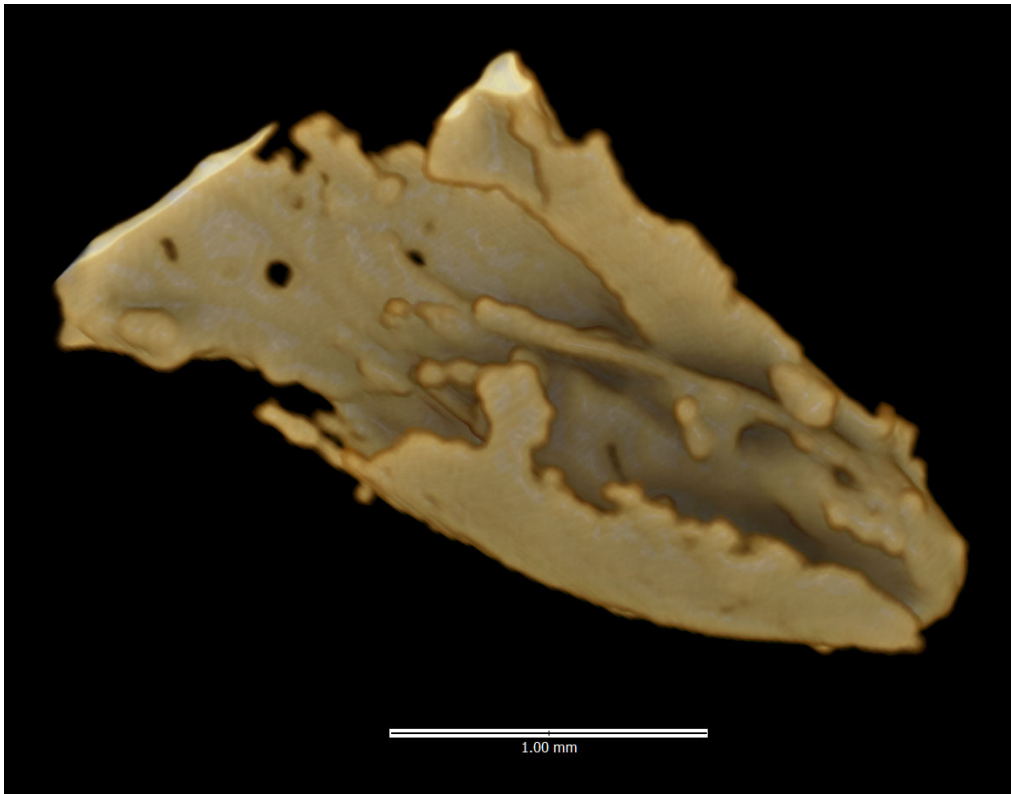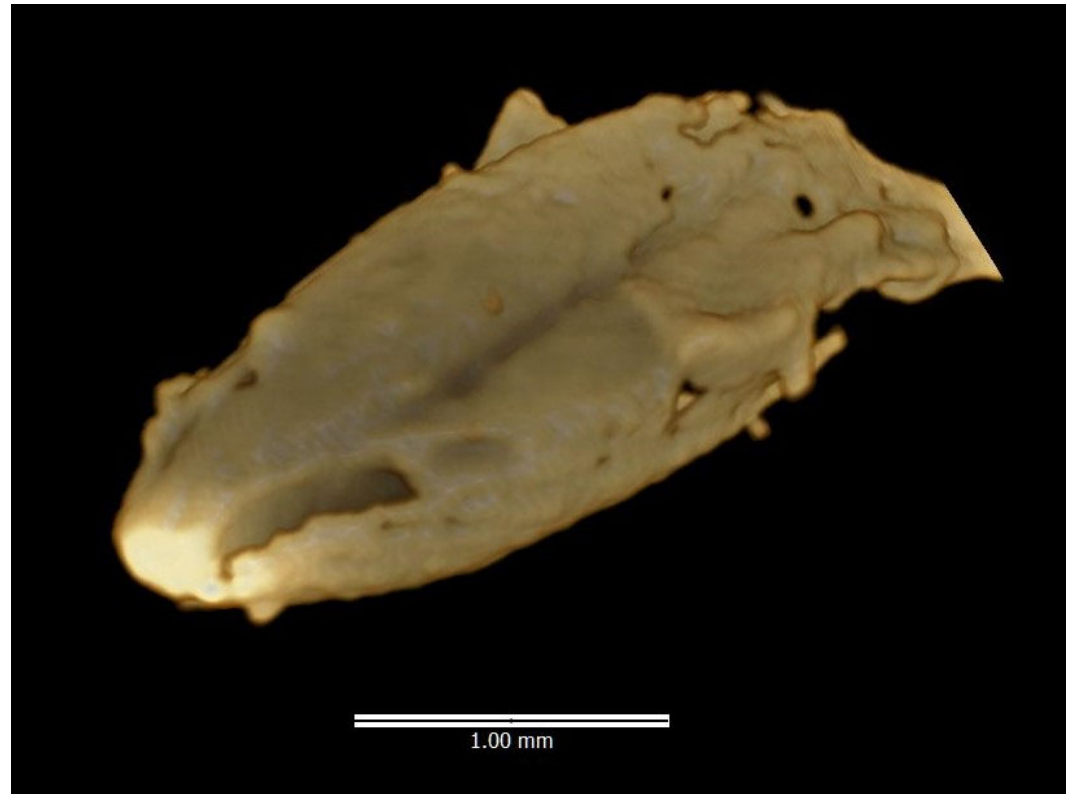

**Inclusion 13.** Two views of solitary spikelet in fragment of probably sessile involucre base, with preserved bristles.

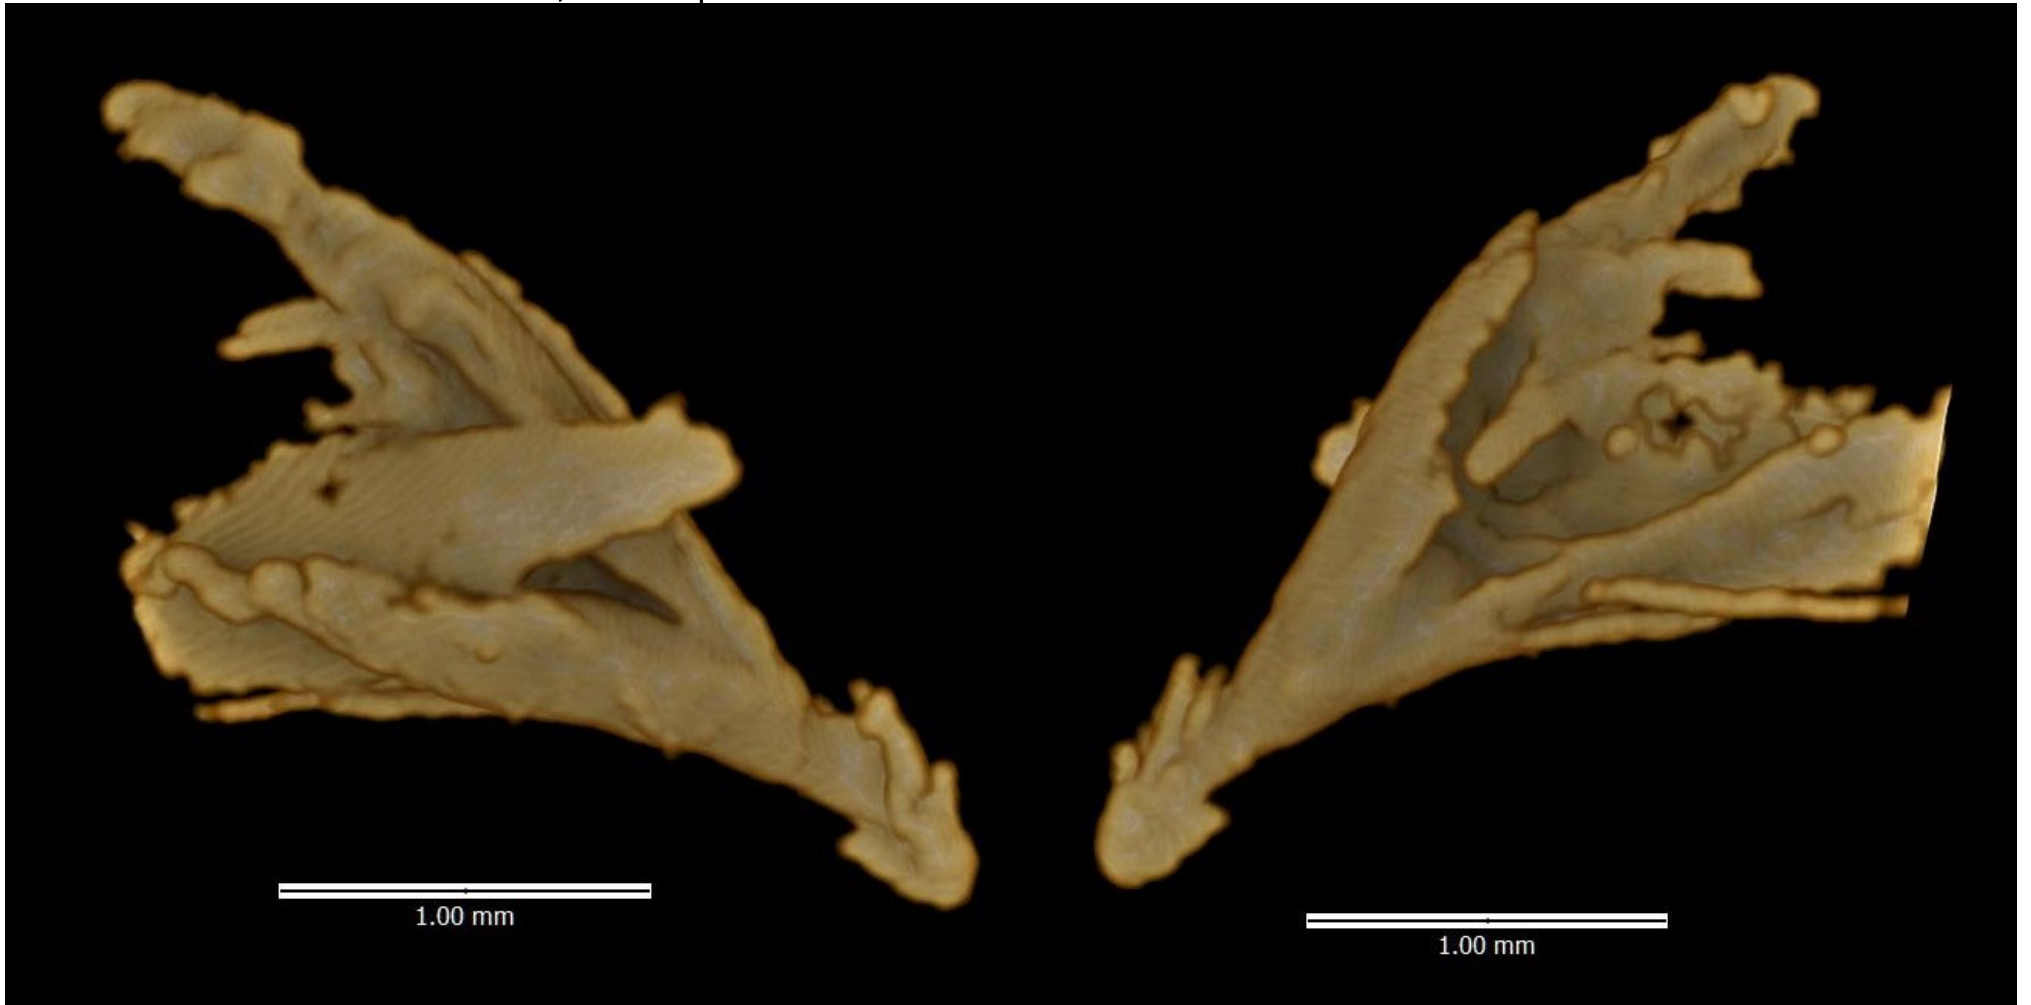

# Sherd 295

Eroded surface

Surface érodée,  
Décor non identifiable

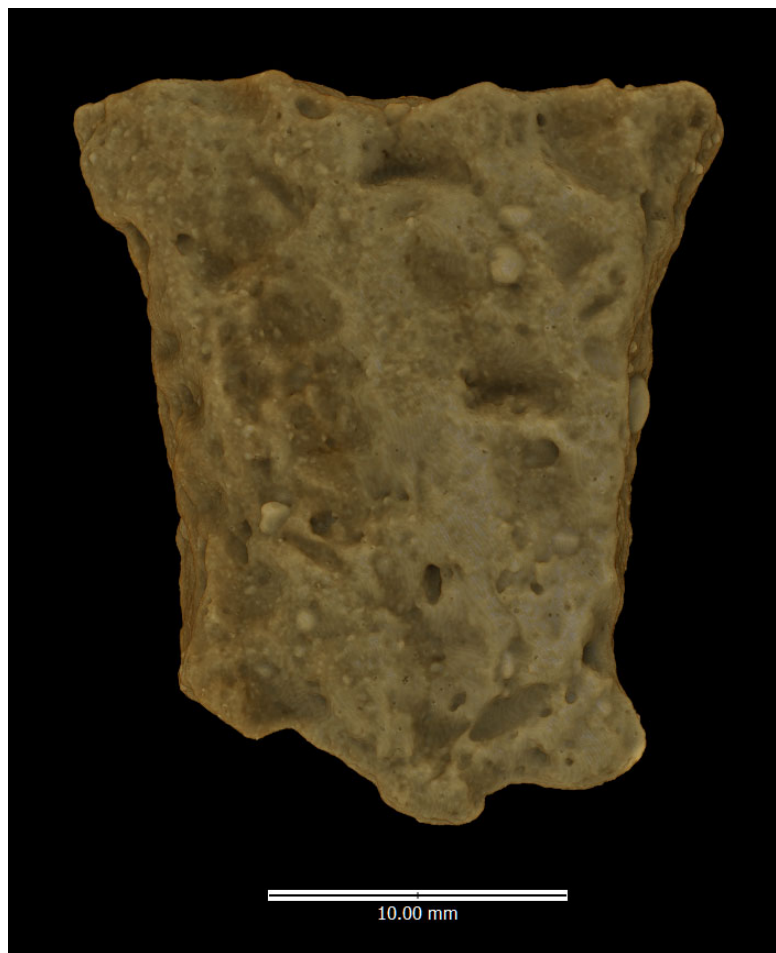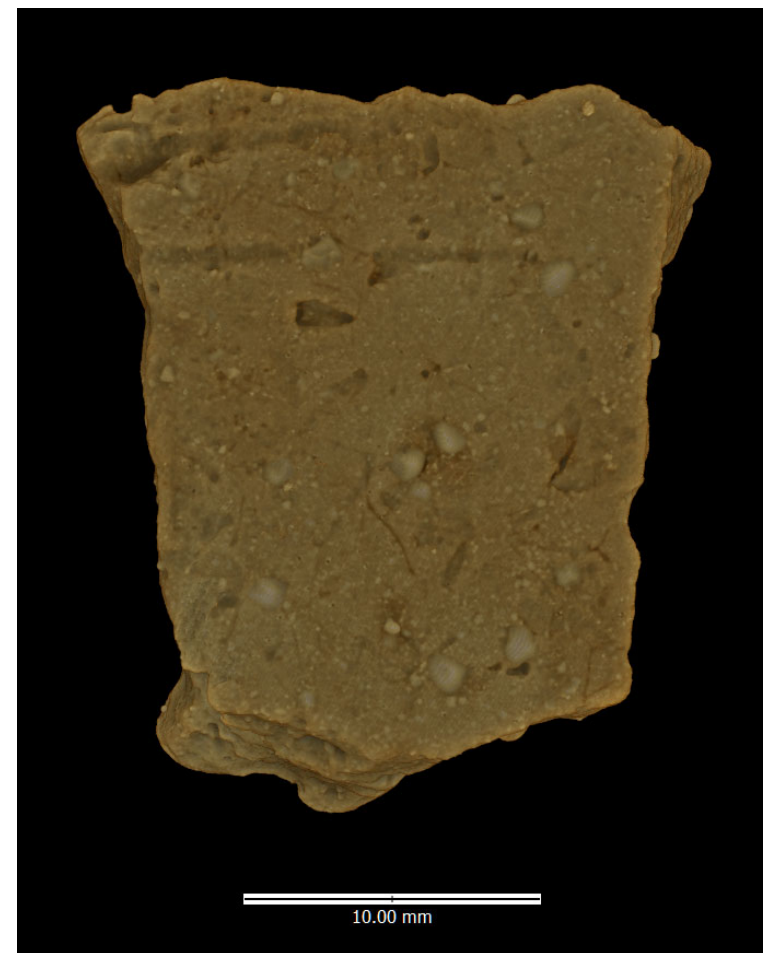



# Inclusion 31. Two views, spikelet.

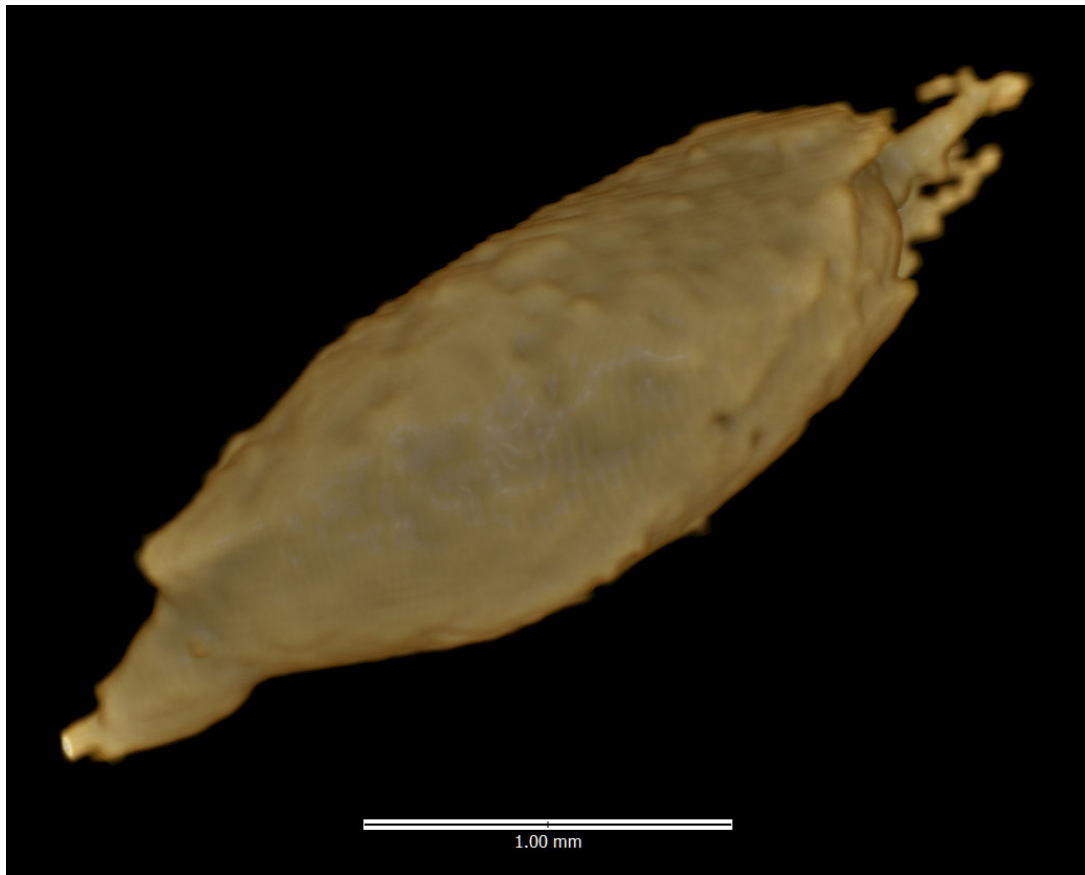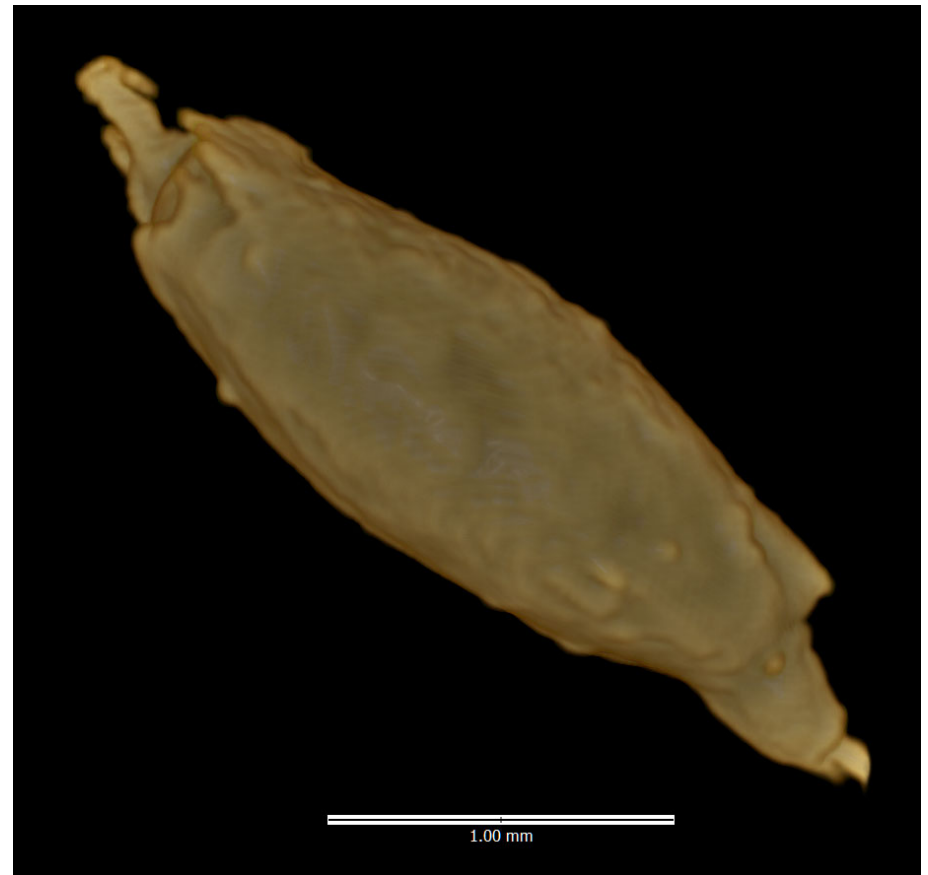

# Inclusion 32. Two views, spikelet

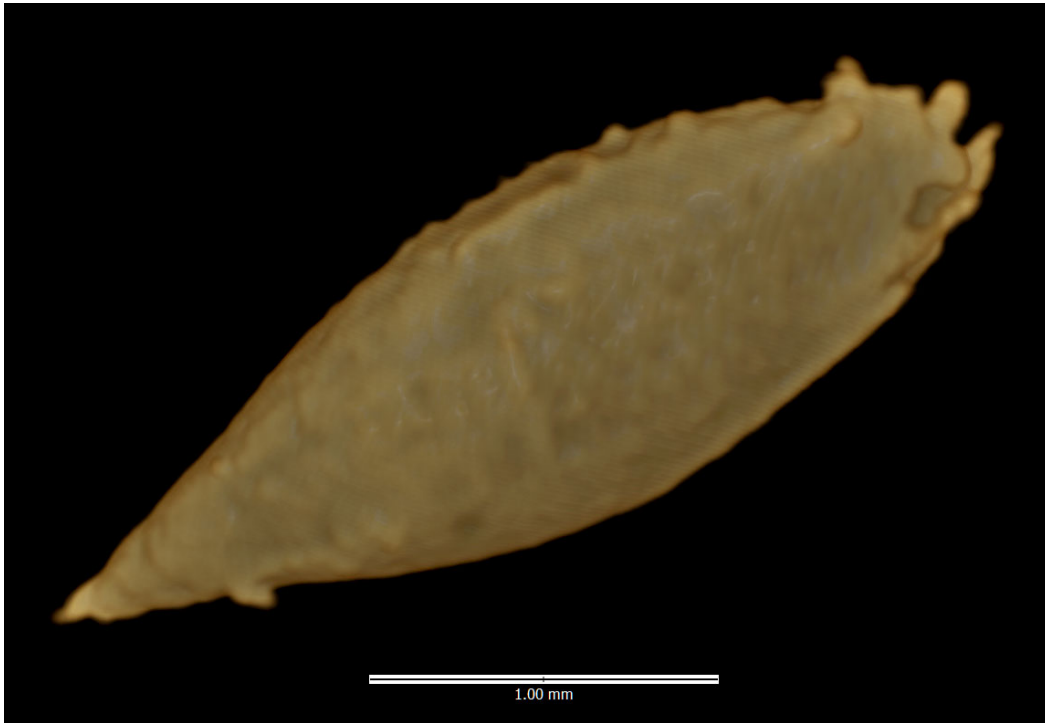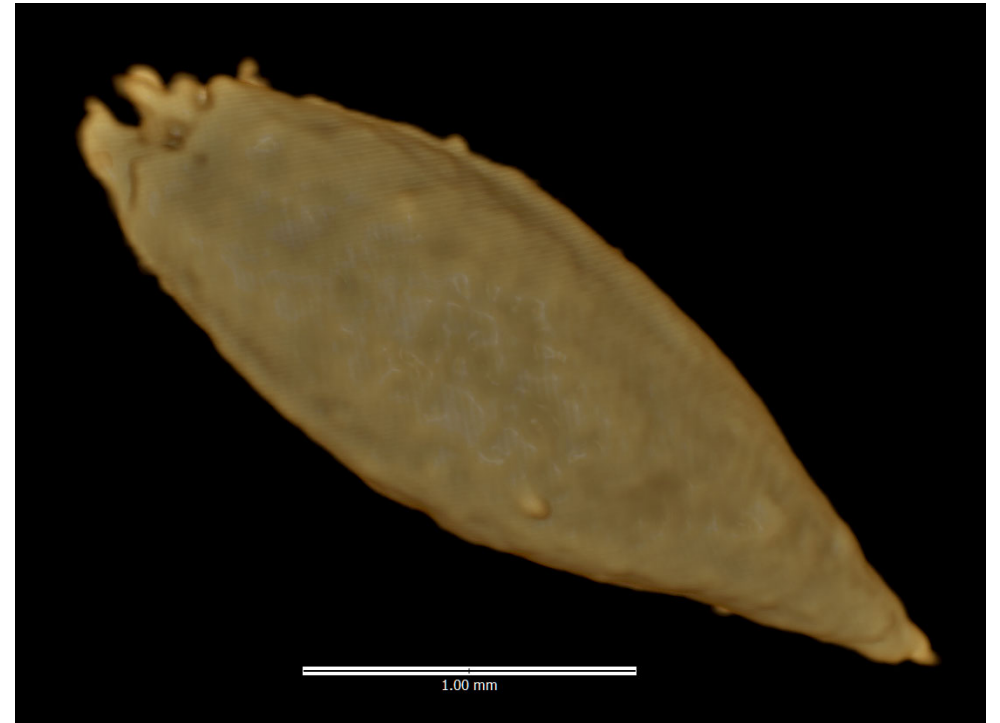

# Sherd 304

Eroded surface

Surface érodée,  
Décor non identifiable

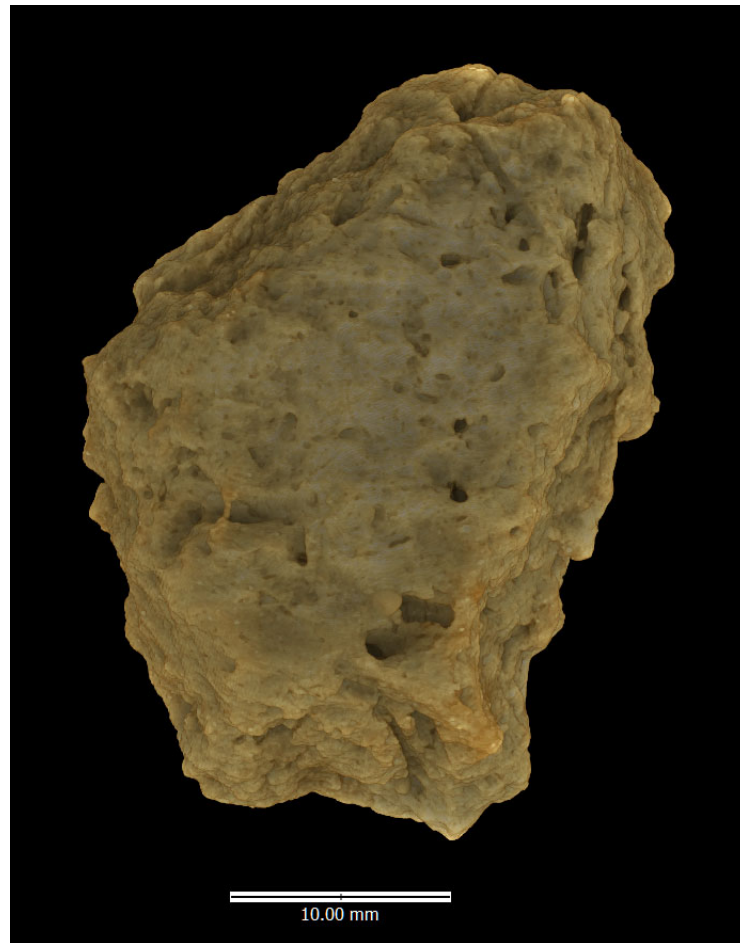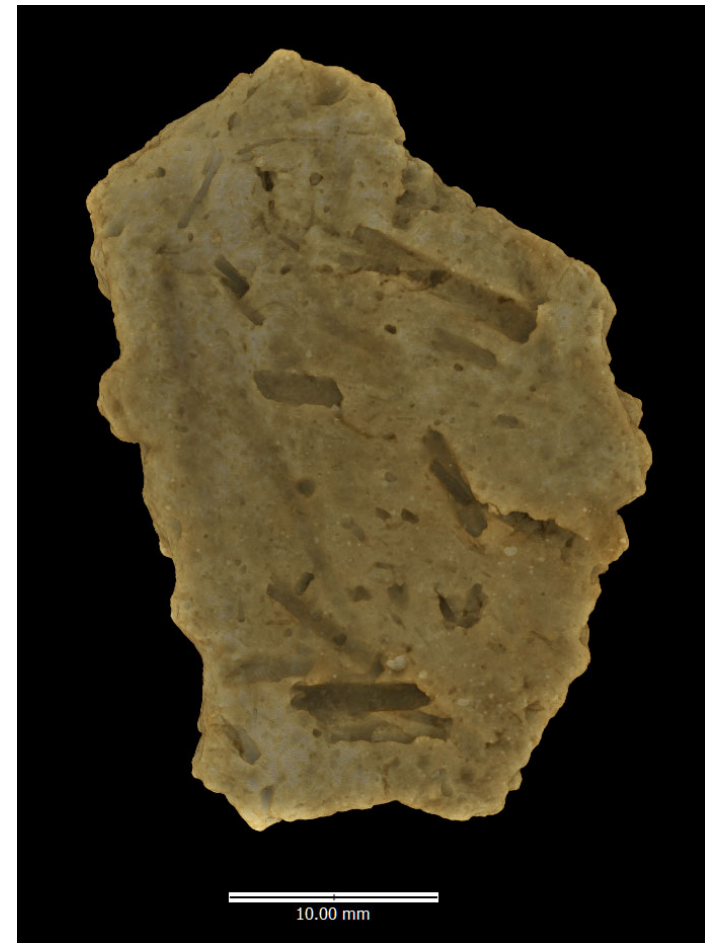

# Inclusion 8. Two views, spikelet

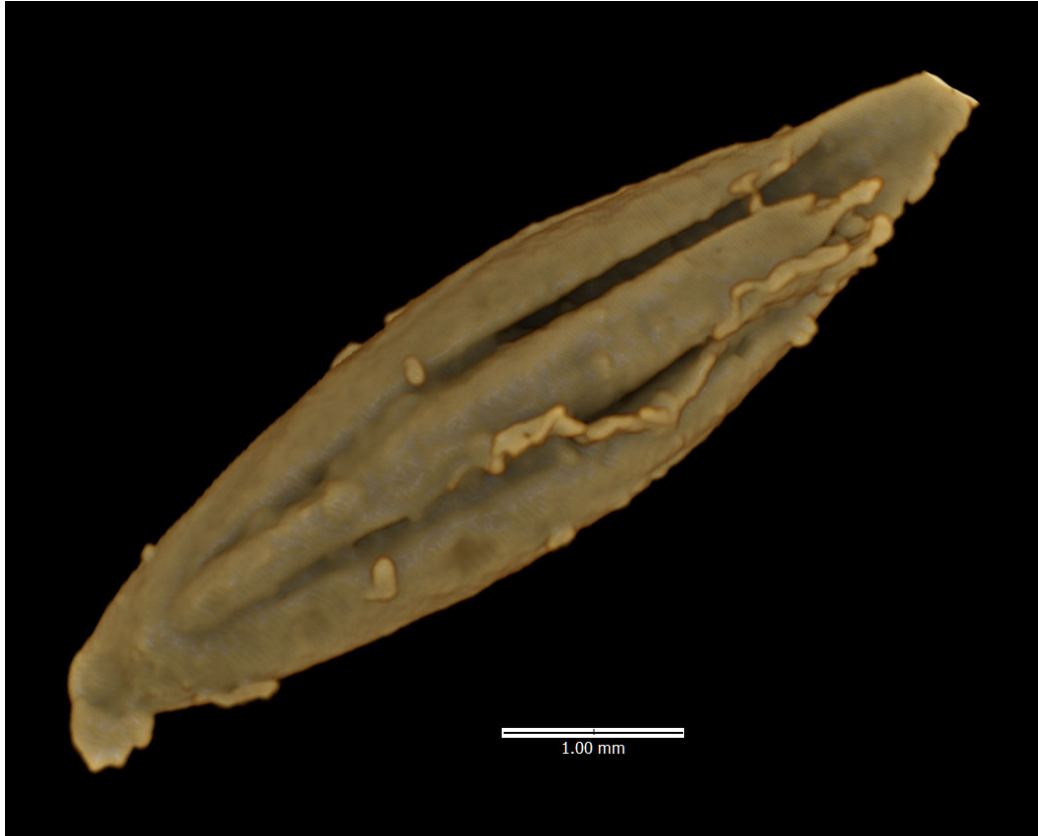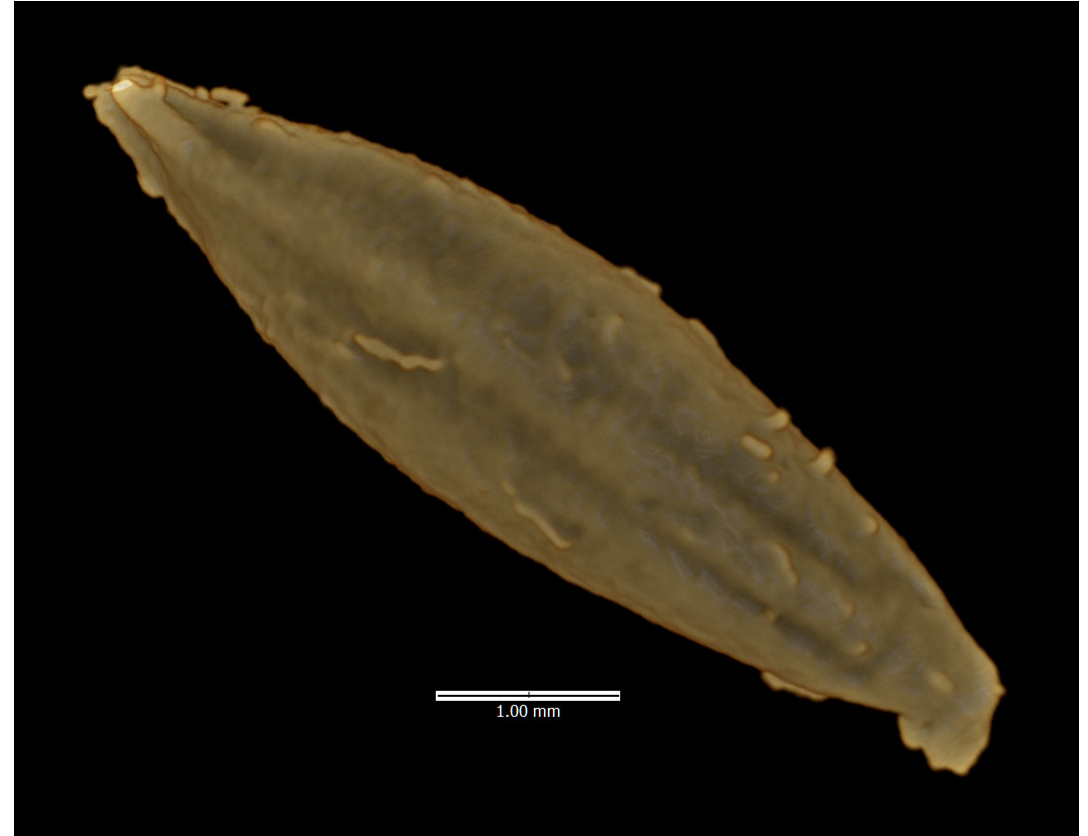

# Sherd 369

Eroded surface

Surface érodée,  
Décor non identifiable

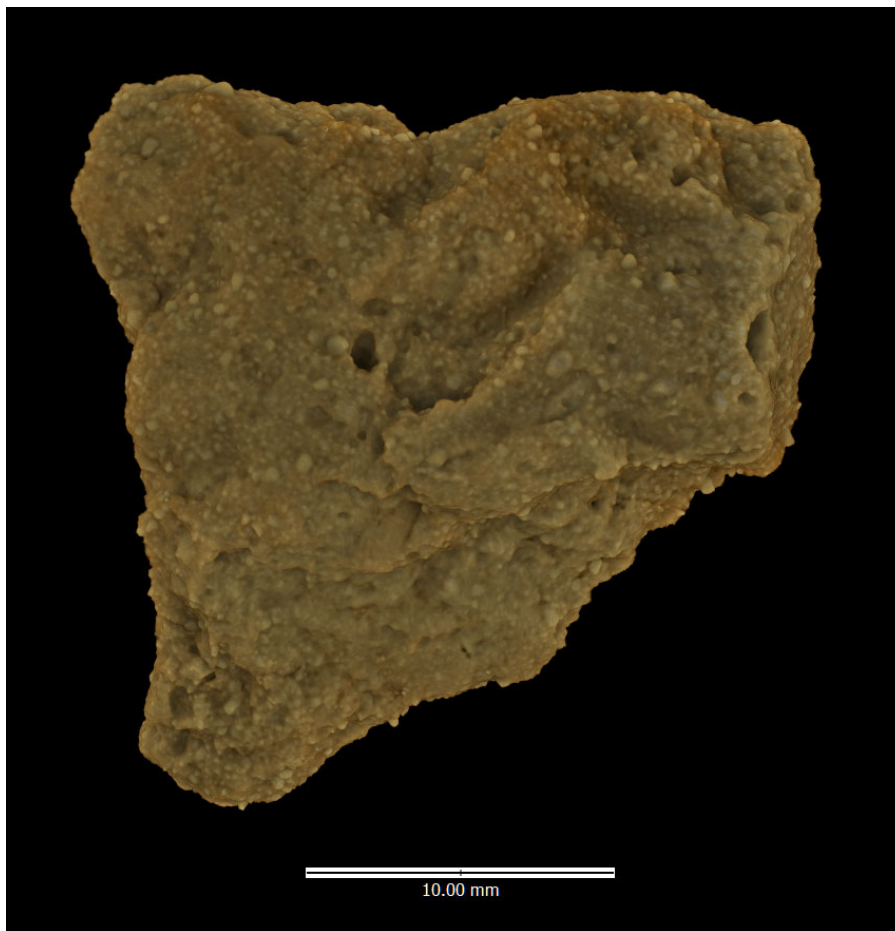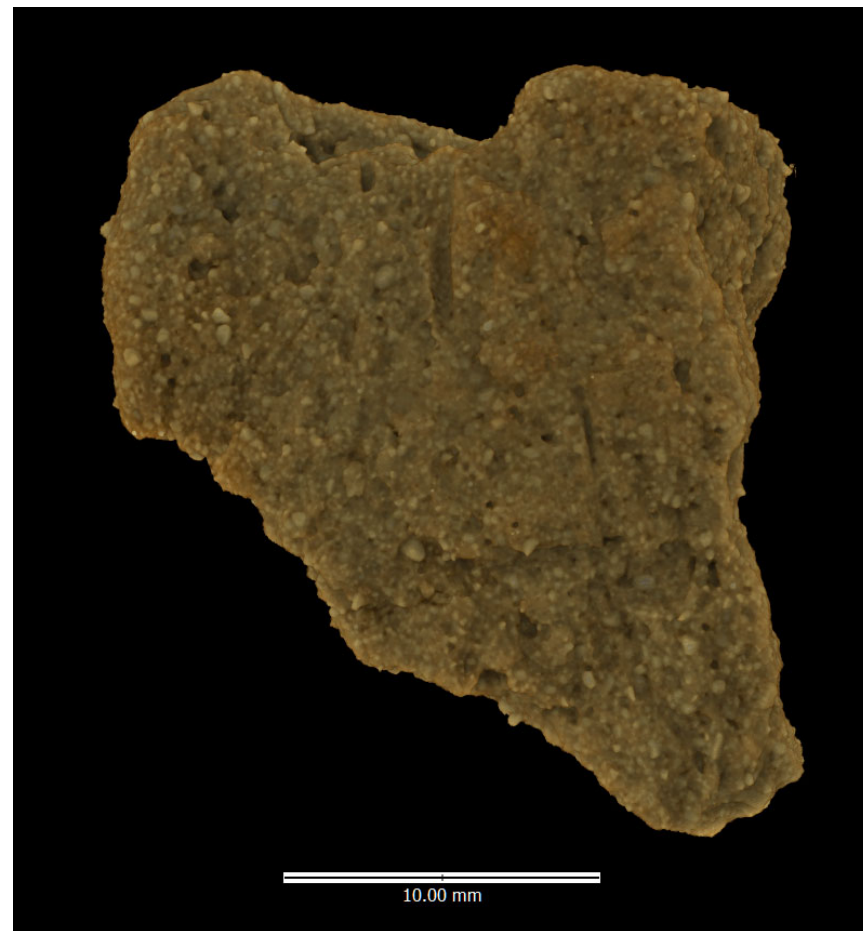

# Inclusion 4. Two views, fragmentary spikelet (lemma and palea)

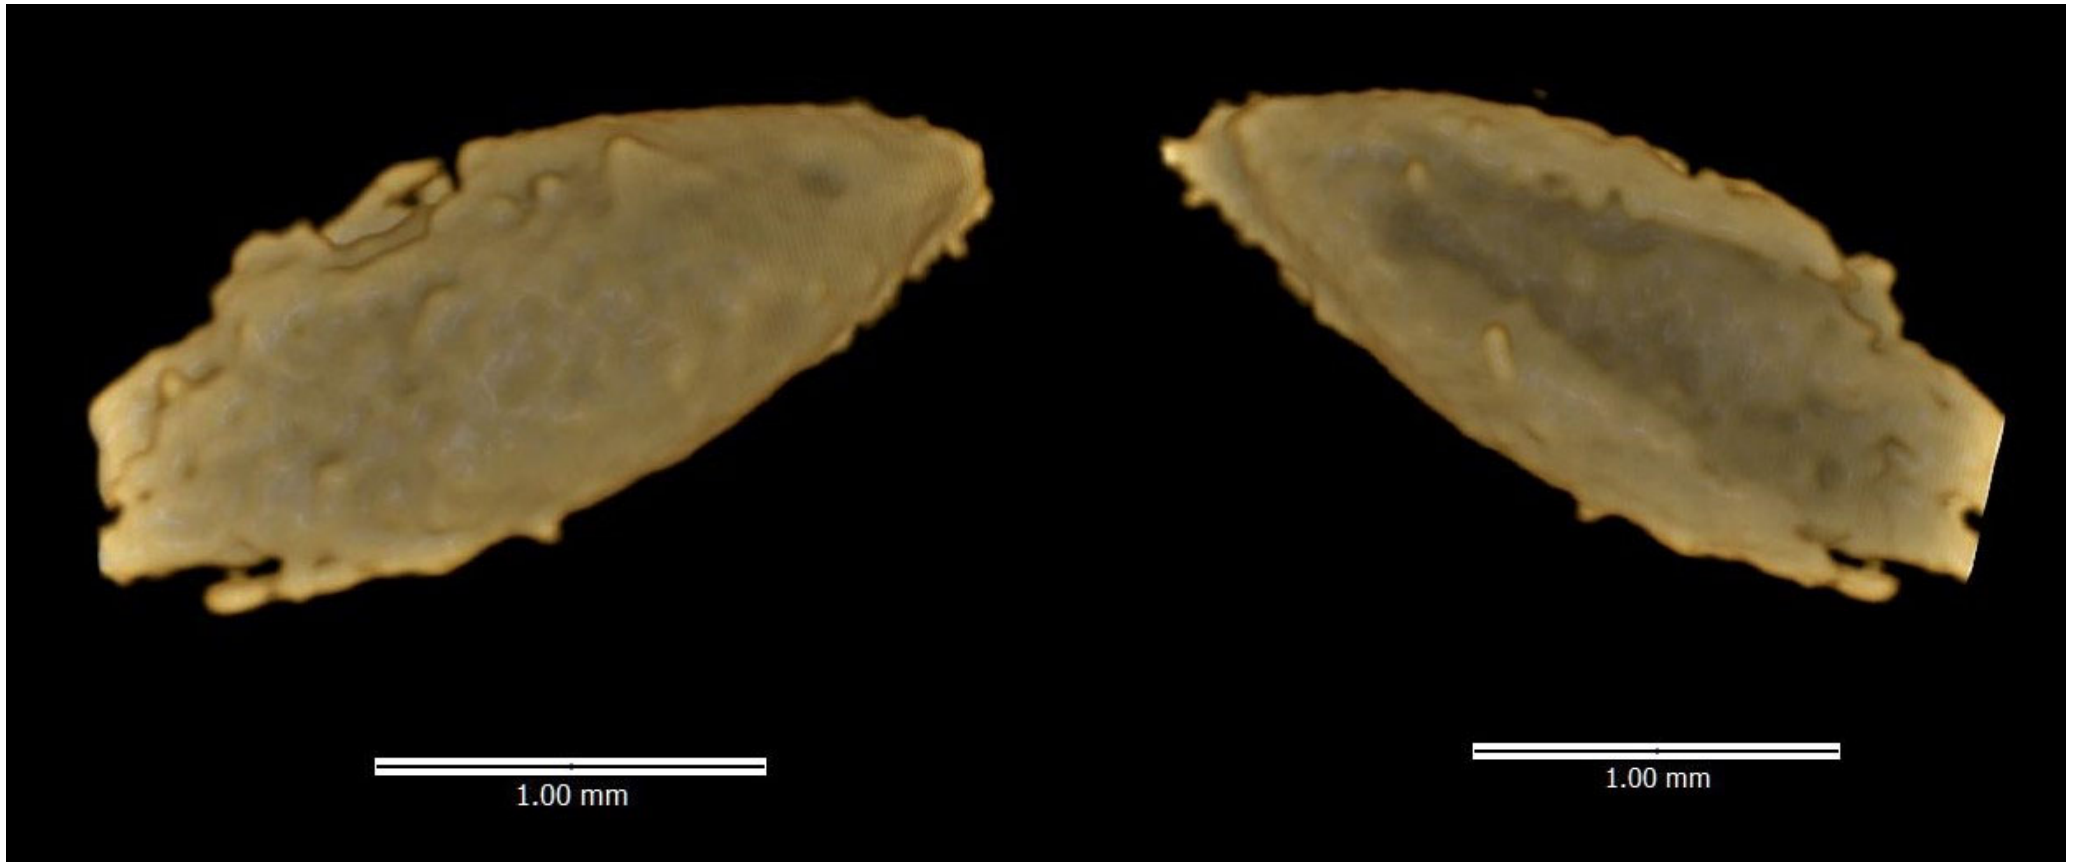

# Sherd 728

Decoration:

Perpendicular simple impression with  
round edged point

Impression simple perpendiculaire  
avec poinçon à partie active mousse  
(<https://lampea.cnrs.fr/cerafim/spip.php?article232>)

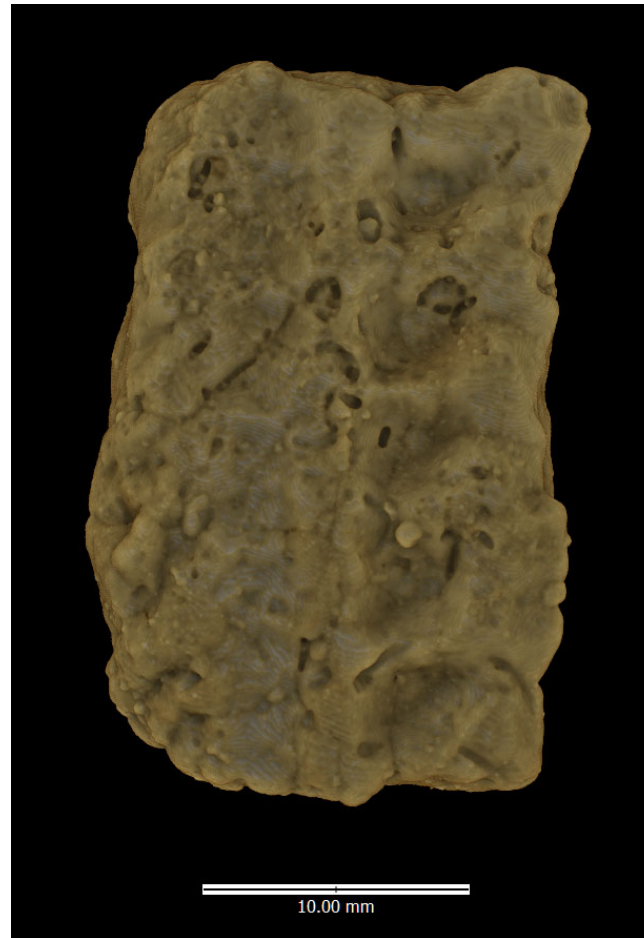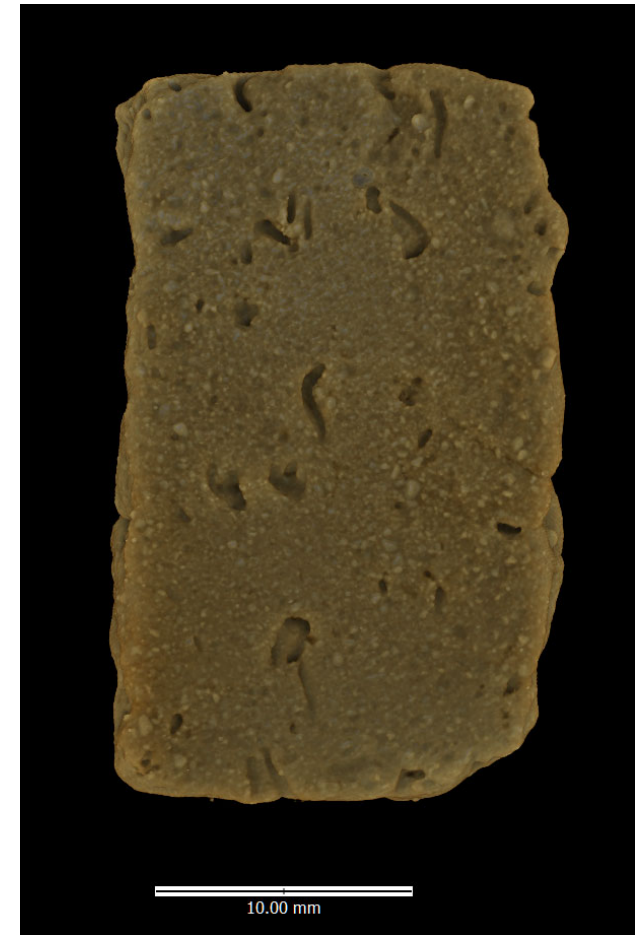

# Inclusion 5.

Bristle fragments from  
involucre base

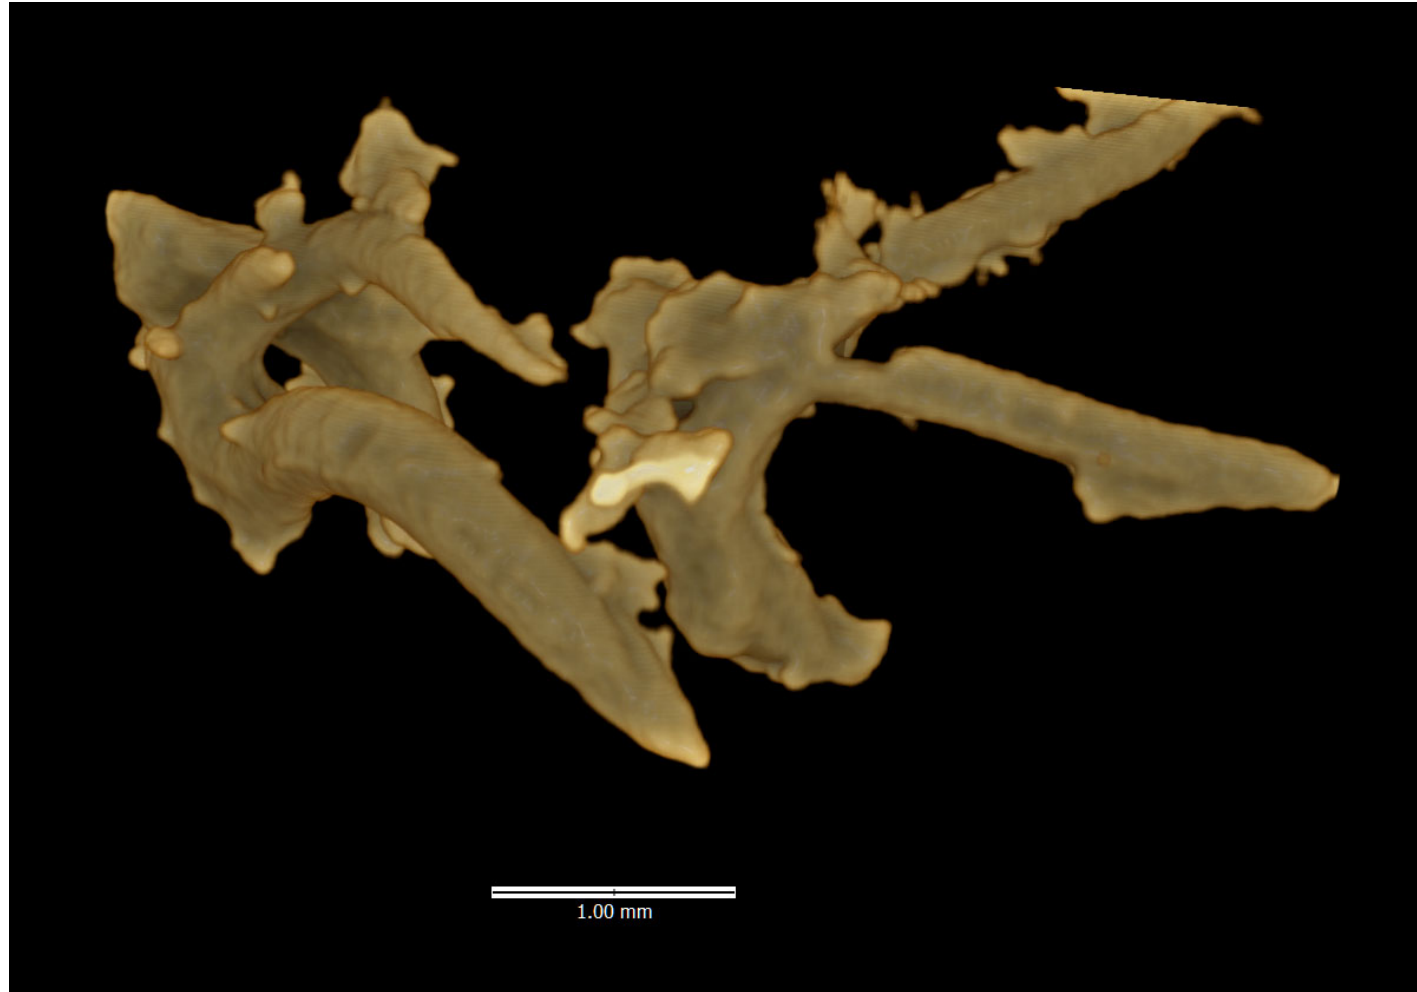



# Sherd 543

Decoration:

Pivoting impression A+B

Leiterband with a multiple teeth (dots and dashes) comb

Impression pivotante A+B

Leiterband avec un peigne à dents multiples mixtes.

<https://lampea.cnrs.fr/cerafim/spip.php?article242>

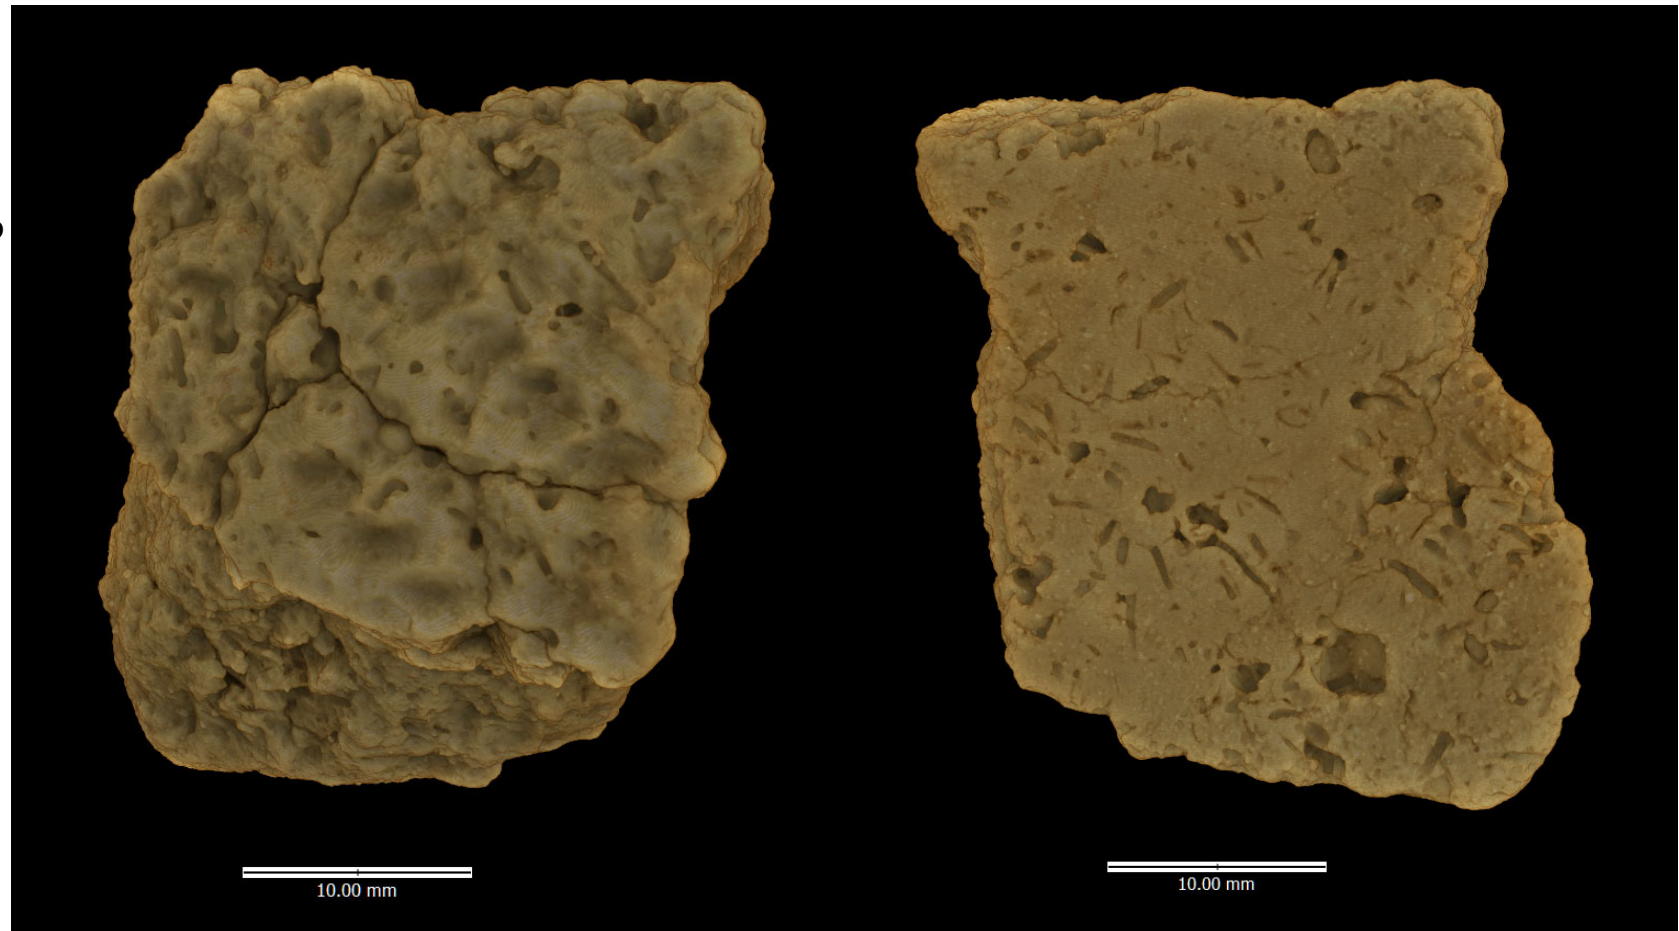

Inclusion 16. *Echinochloa* sp. in husk (spikelet without glumes)

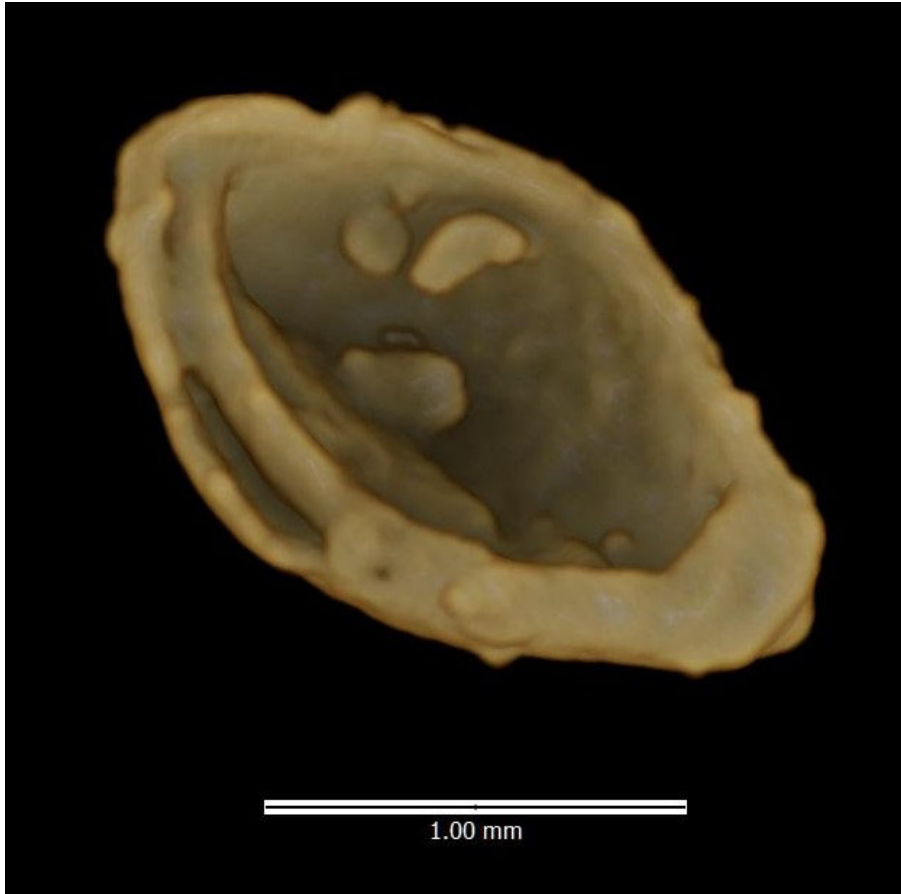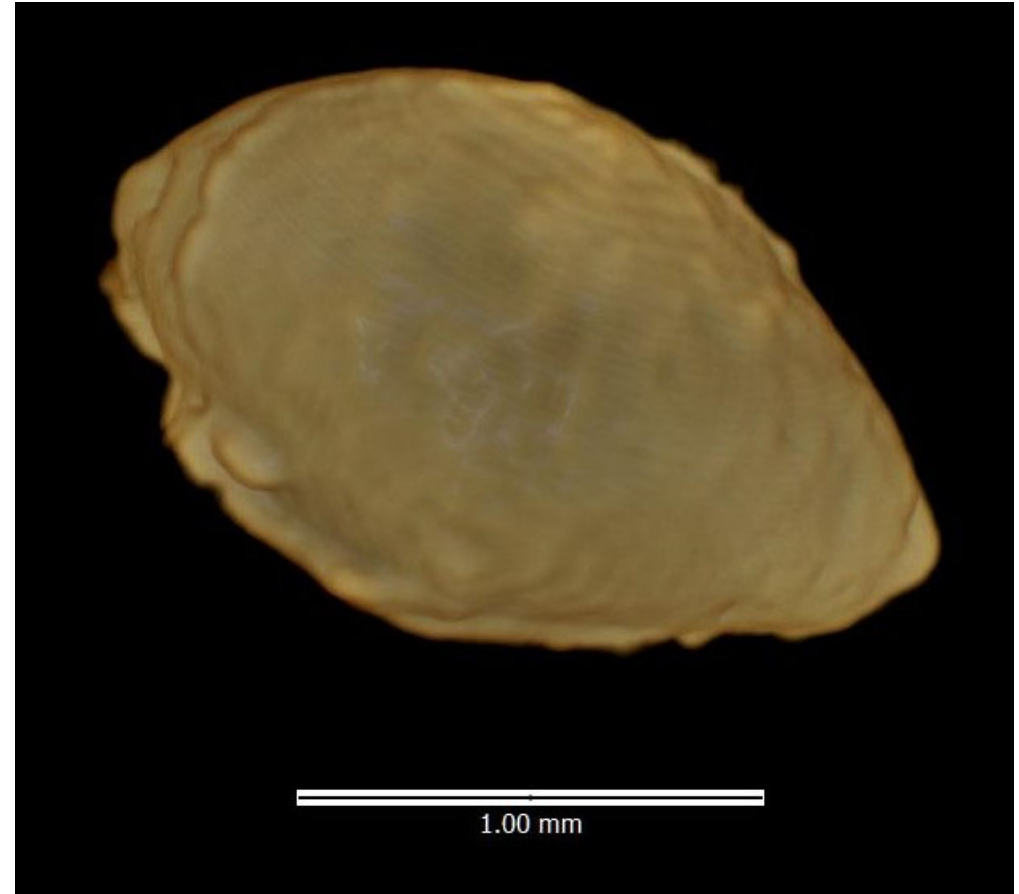

# Inclusion 17. Two views, spikelet

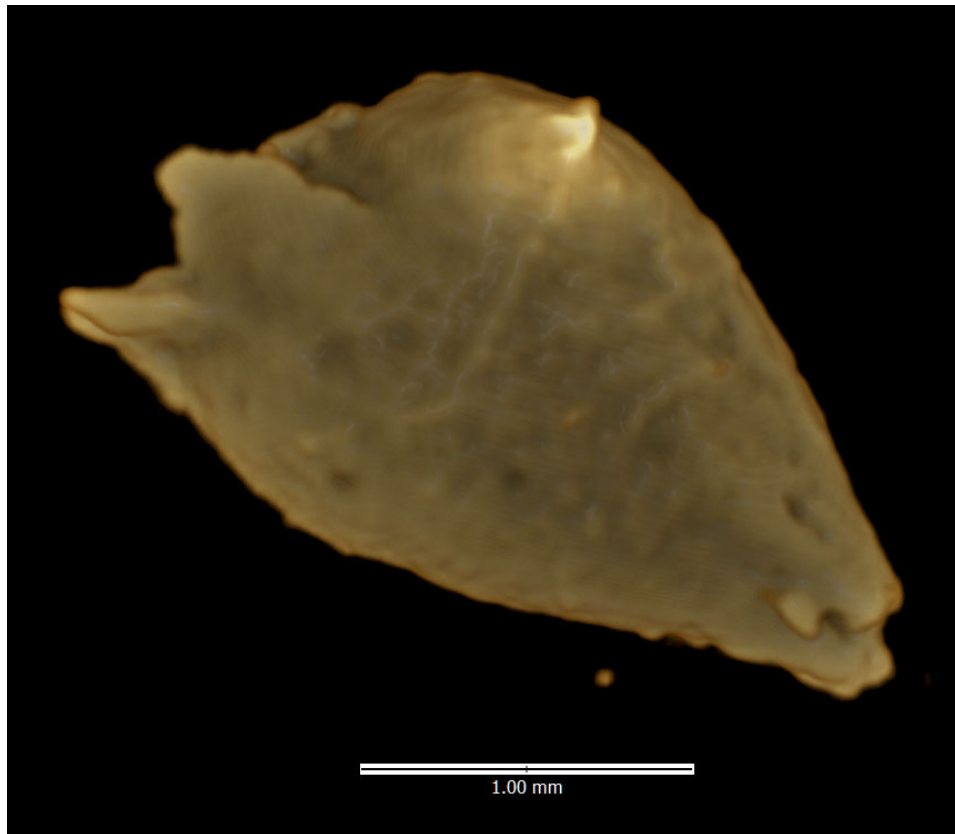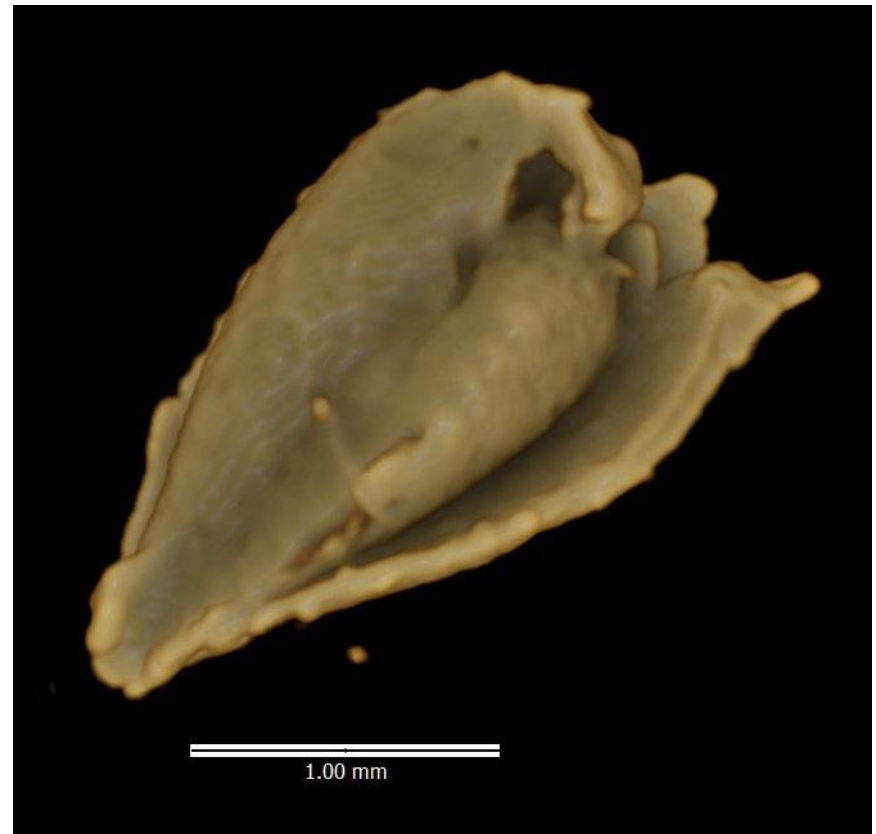

# Sherd 276

Eroded surface  
Indetermined decor

Surface érodée,  
Décor non identifiable

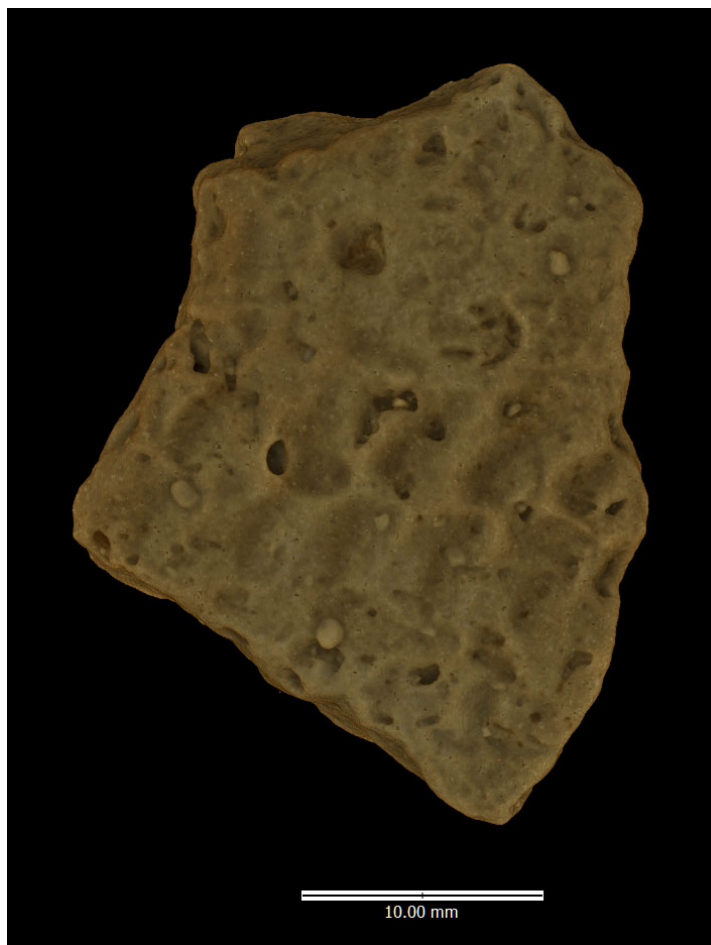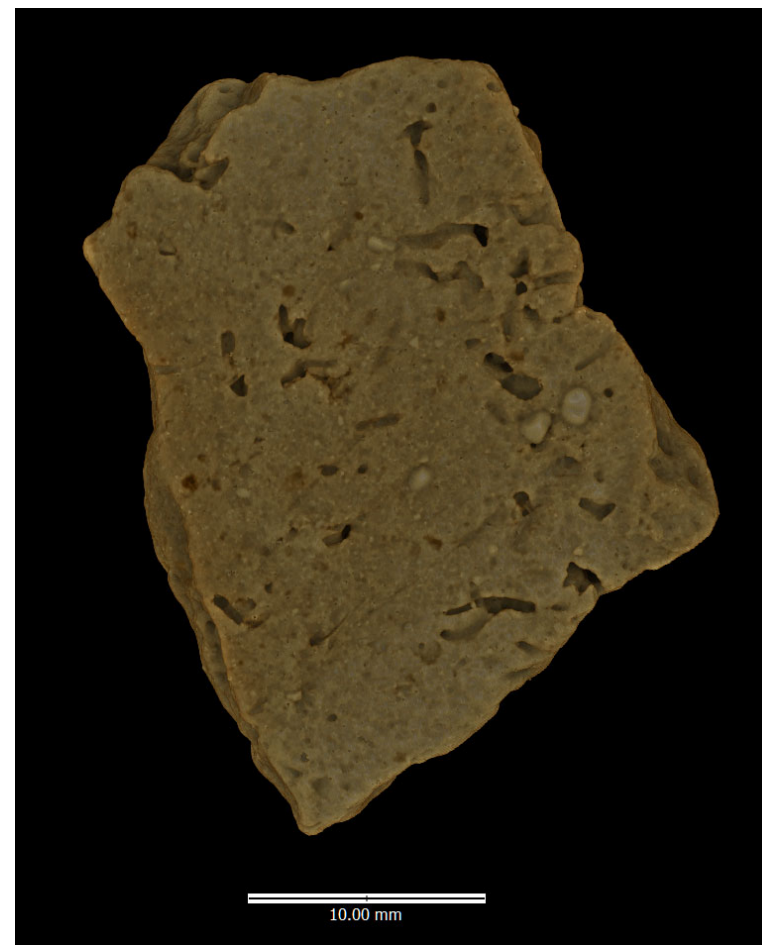

Inclusion 18. Two views of involucre base, with torn peduncle, and bristles.

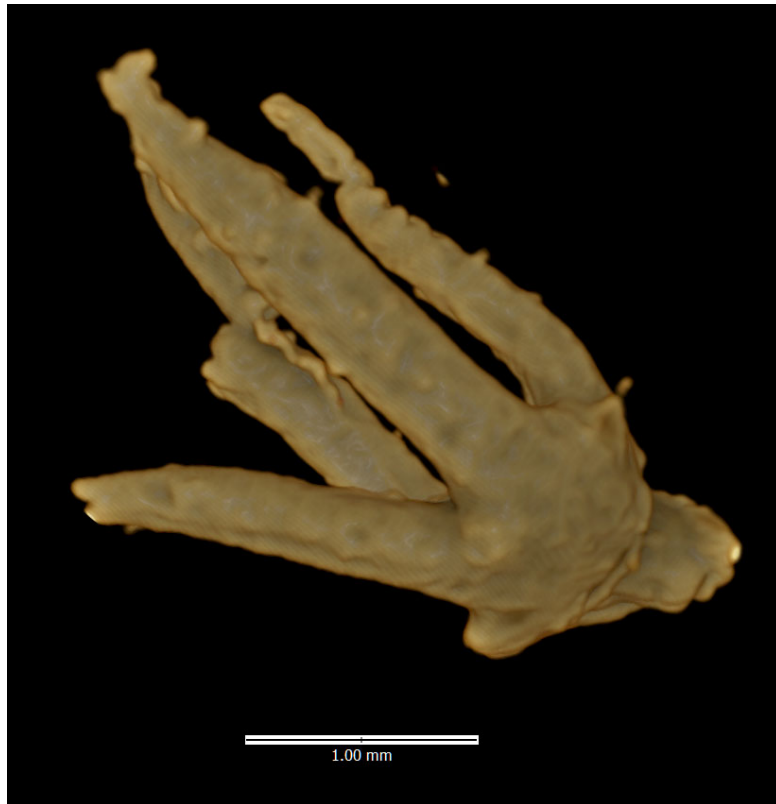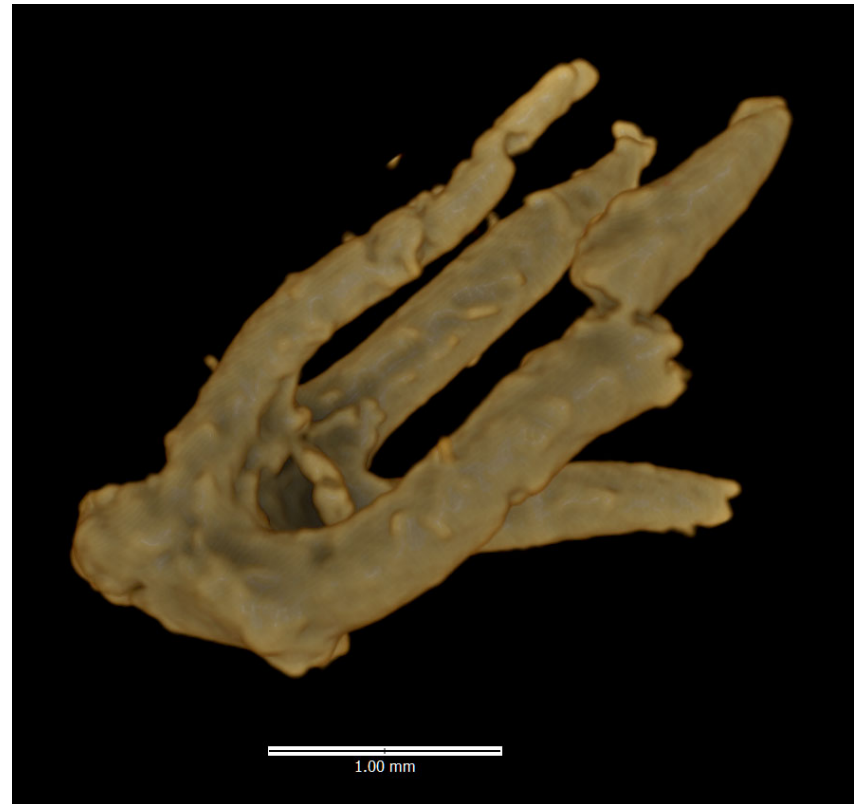

# Inclusion 19. Bristle fragments from involucre base

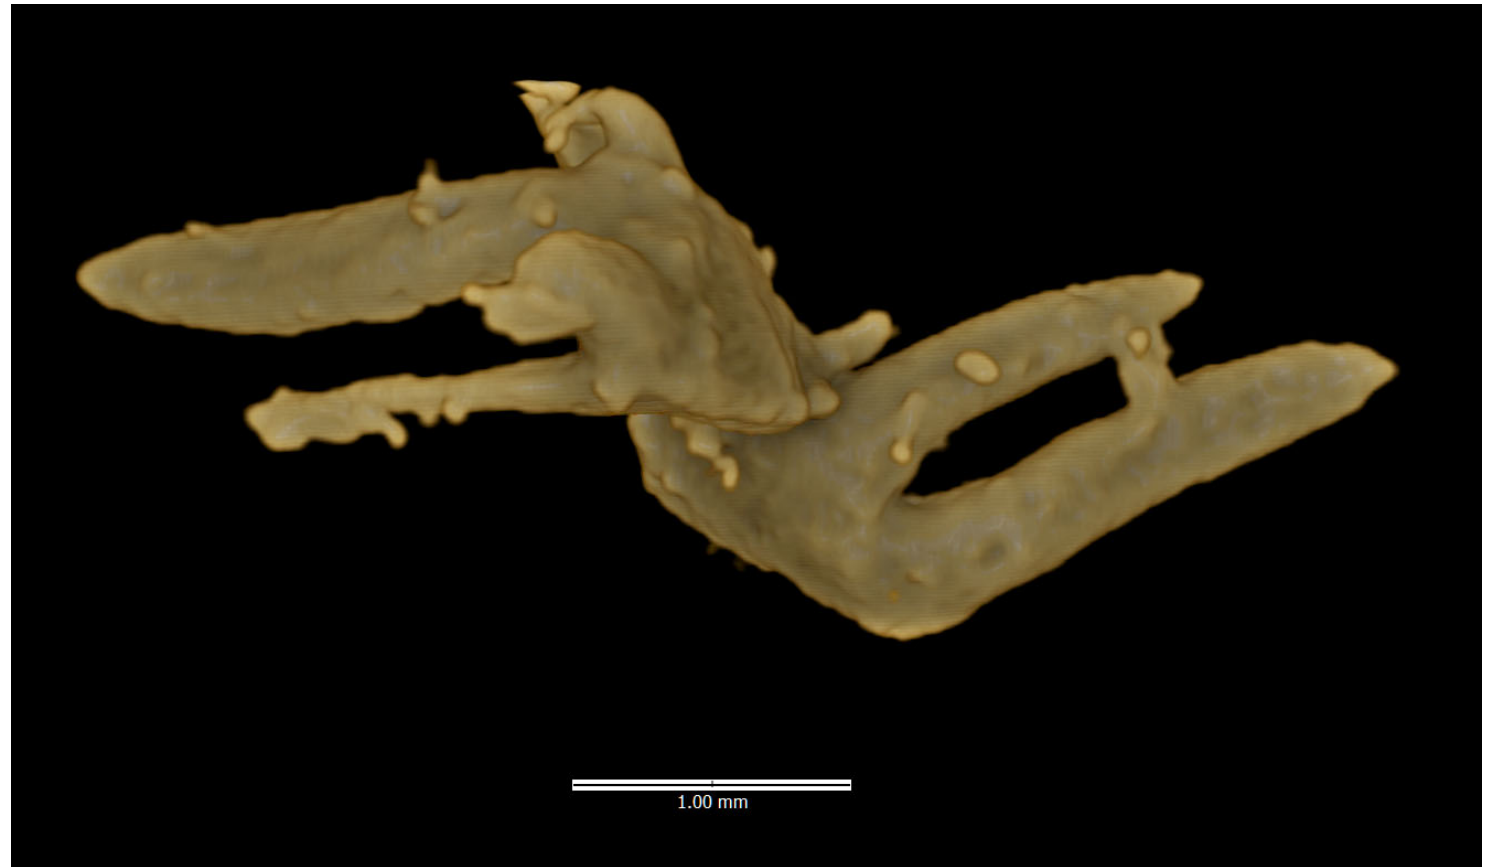

Inclusion 20. Two views: Involucre with sessile base (wild-type abscission) , and paired spikelets.

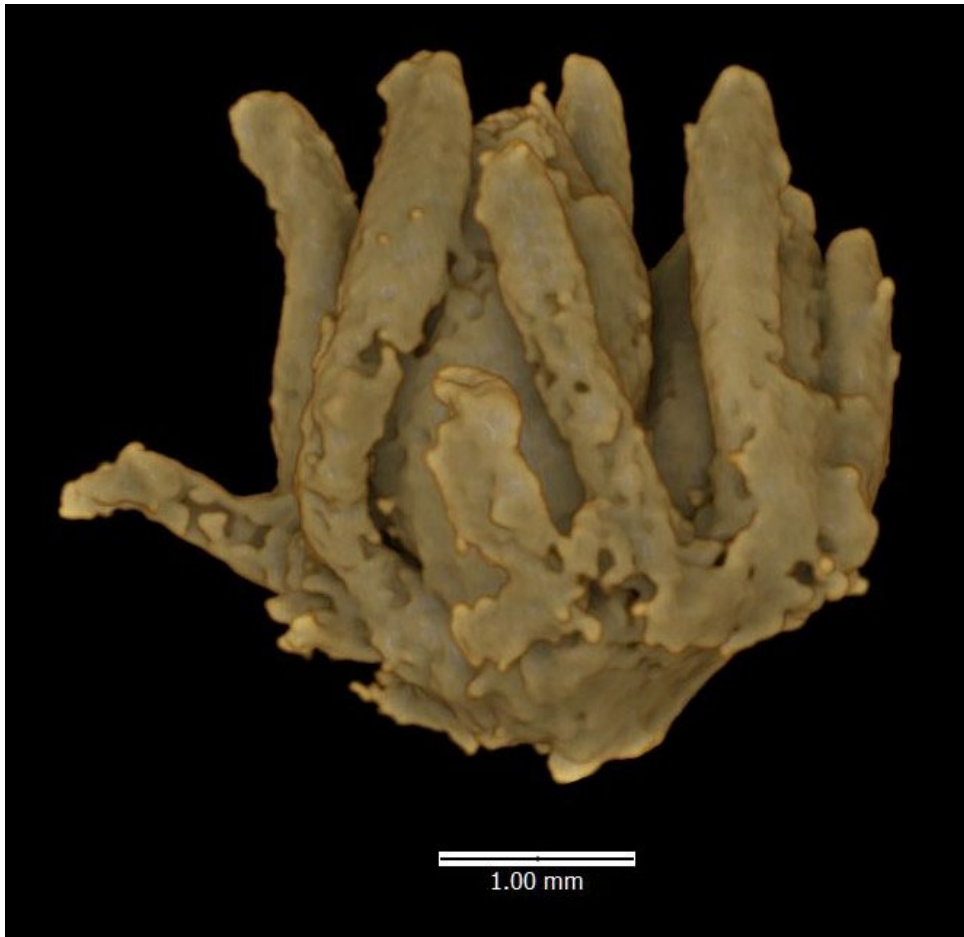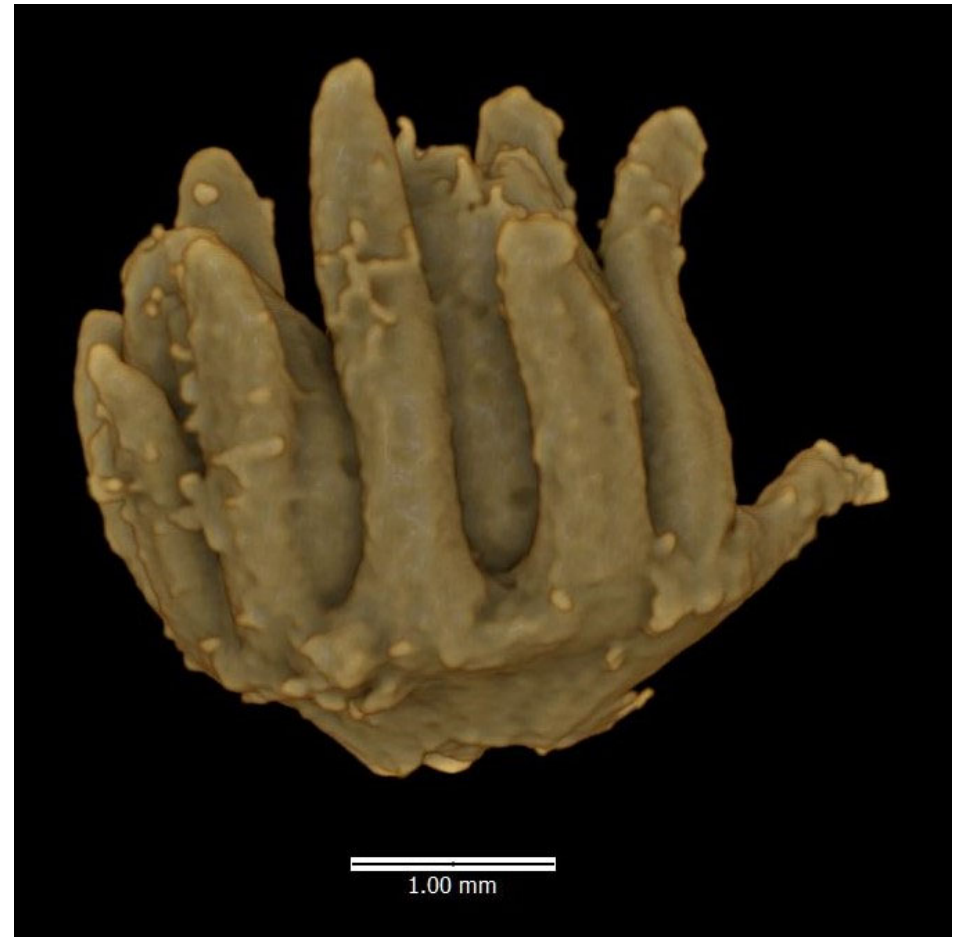

Inclusion 20. Two more views, highlighting sessile base (abscission scar) , and paired spikelets.

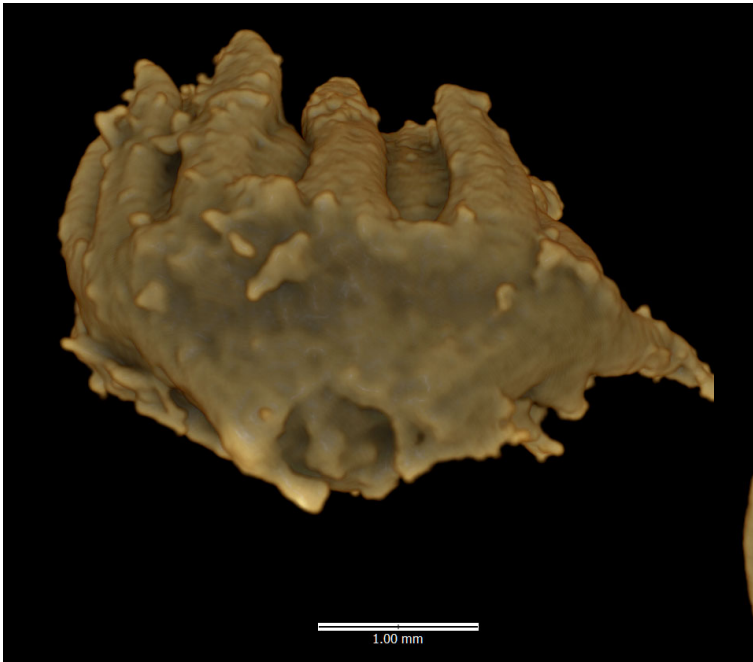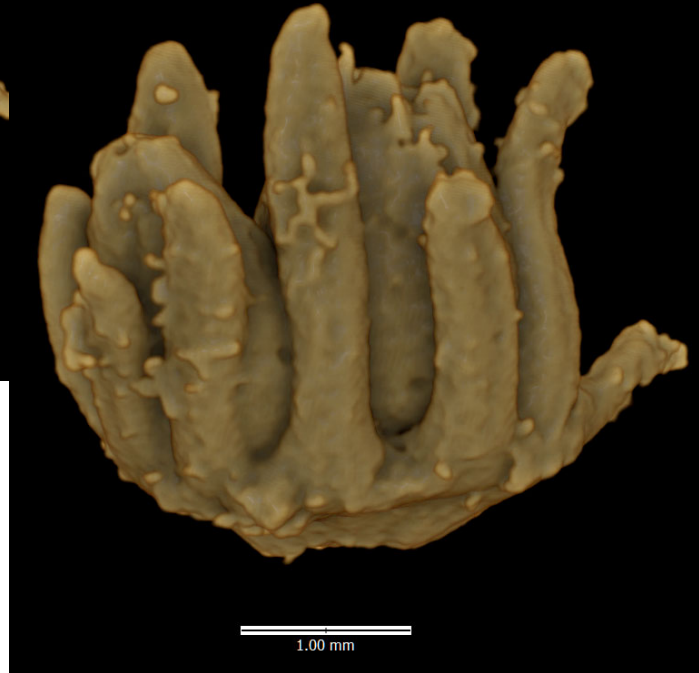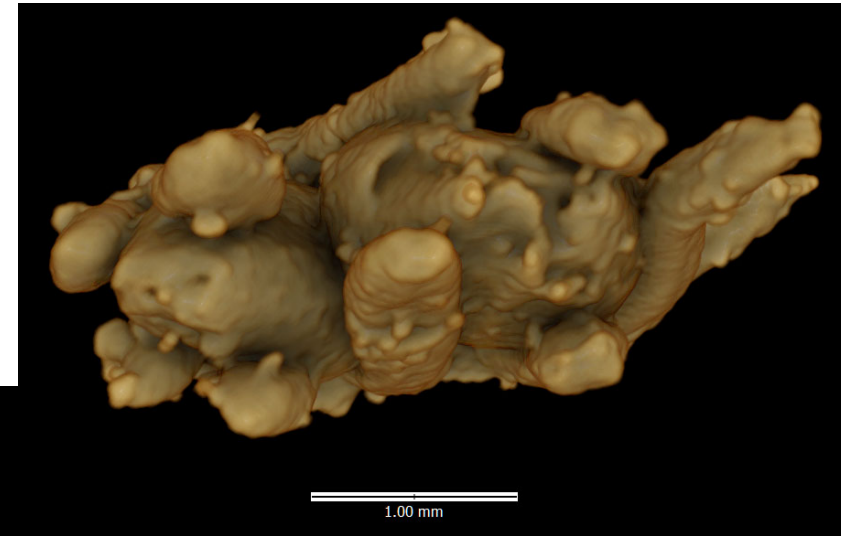



# Inclusion 21. Involucre, with bristles, indeterminate attachment type and spikelet number

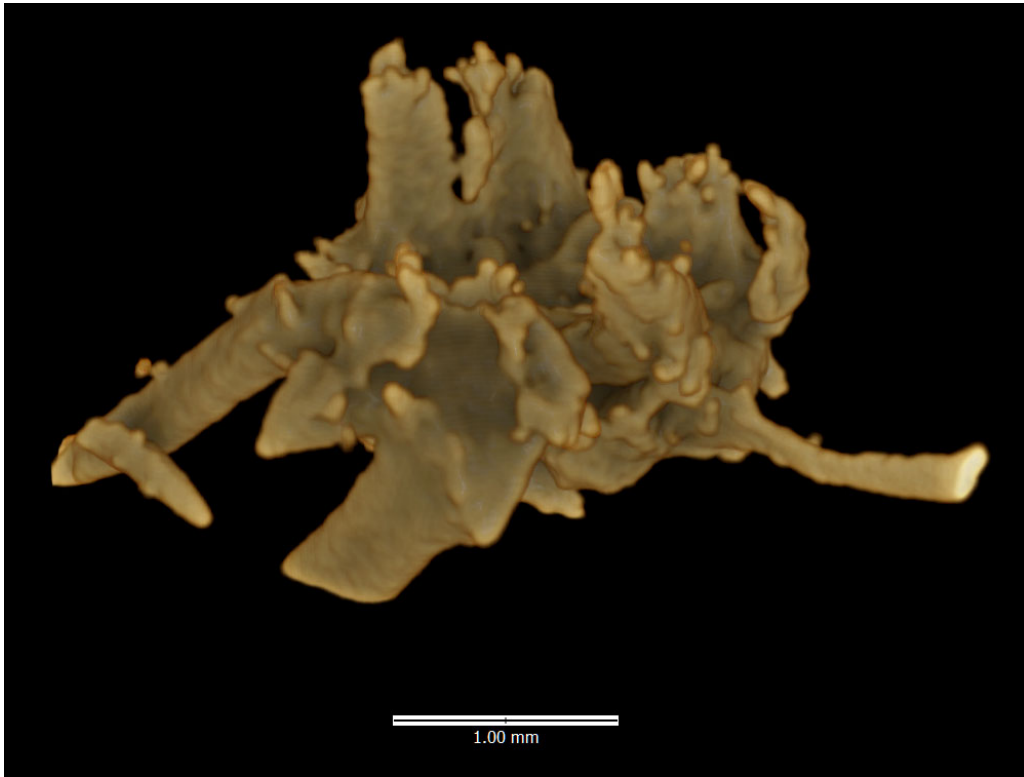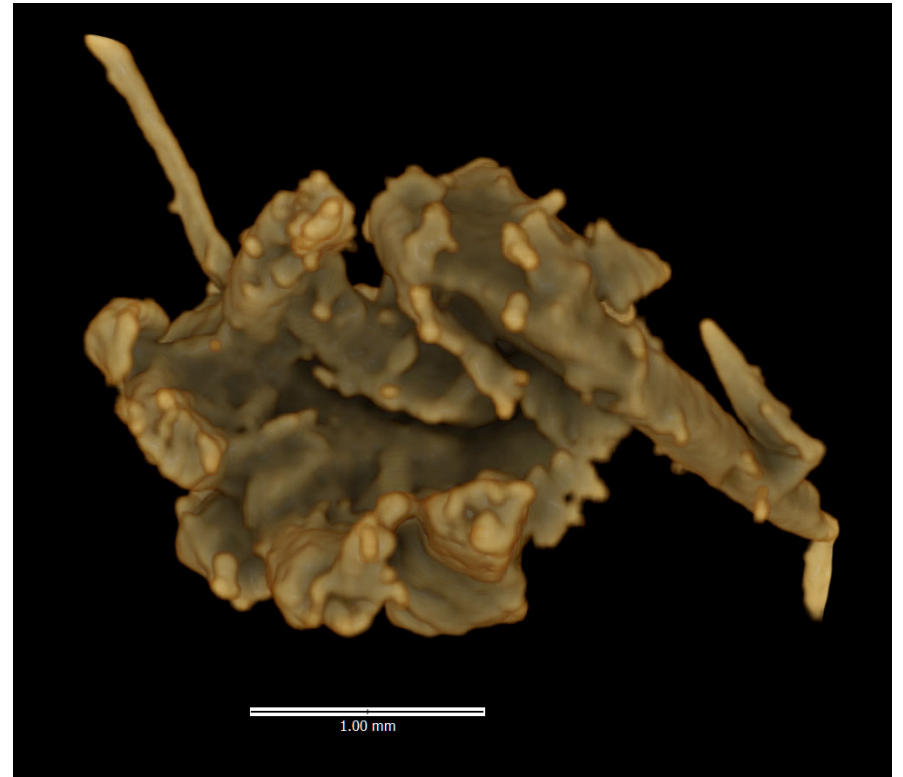

Inclusion 25. Two views: involucre with torn peduncle, indet. Spikelet number; additional bristle (at left)

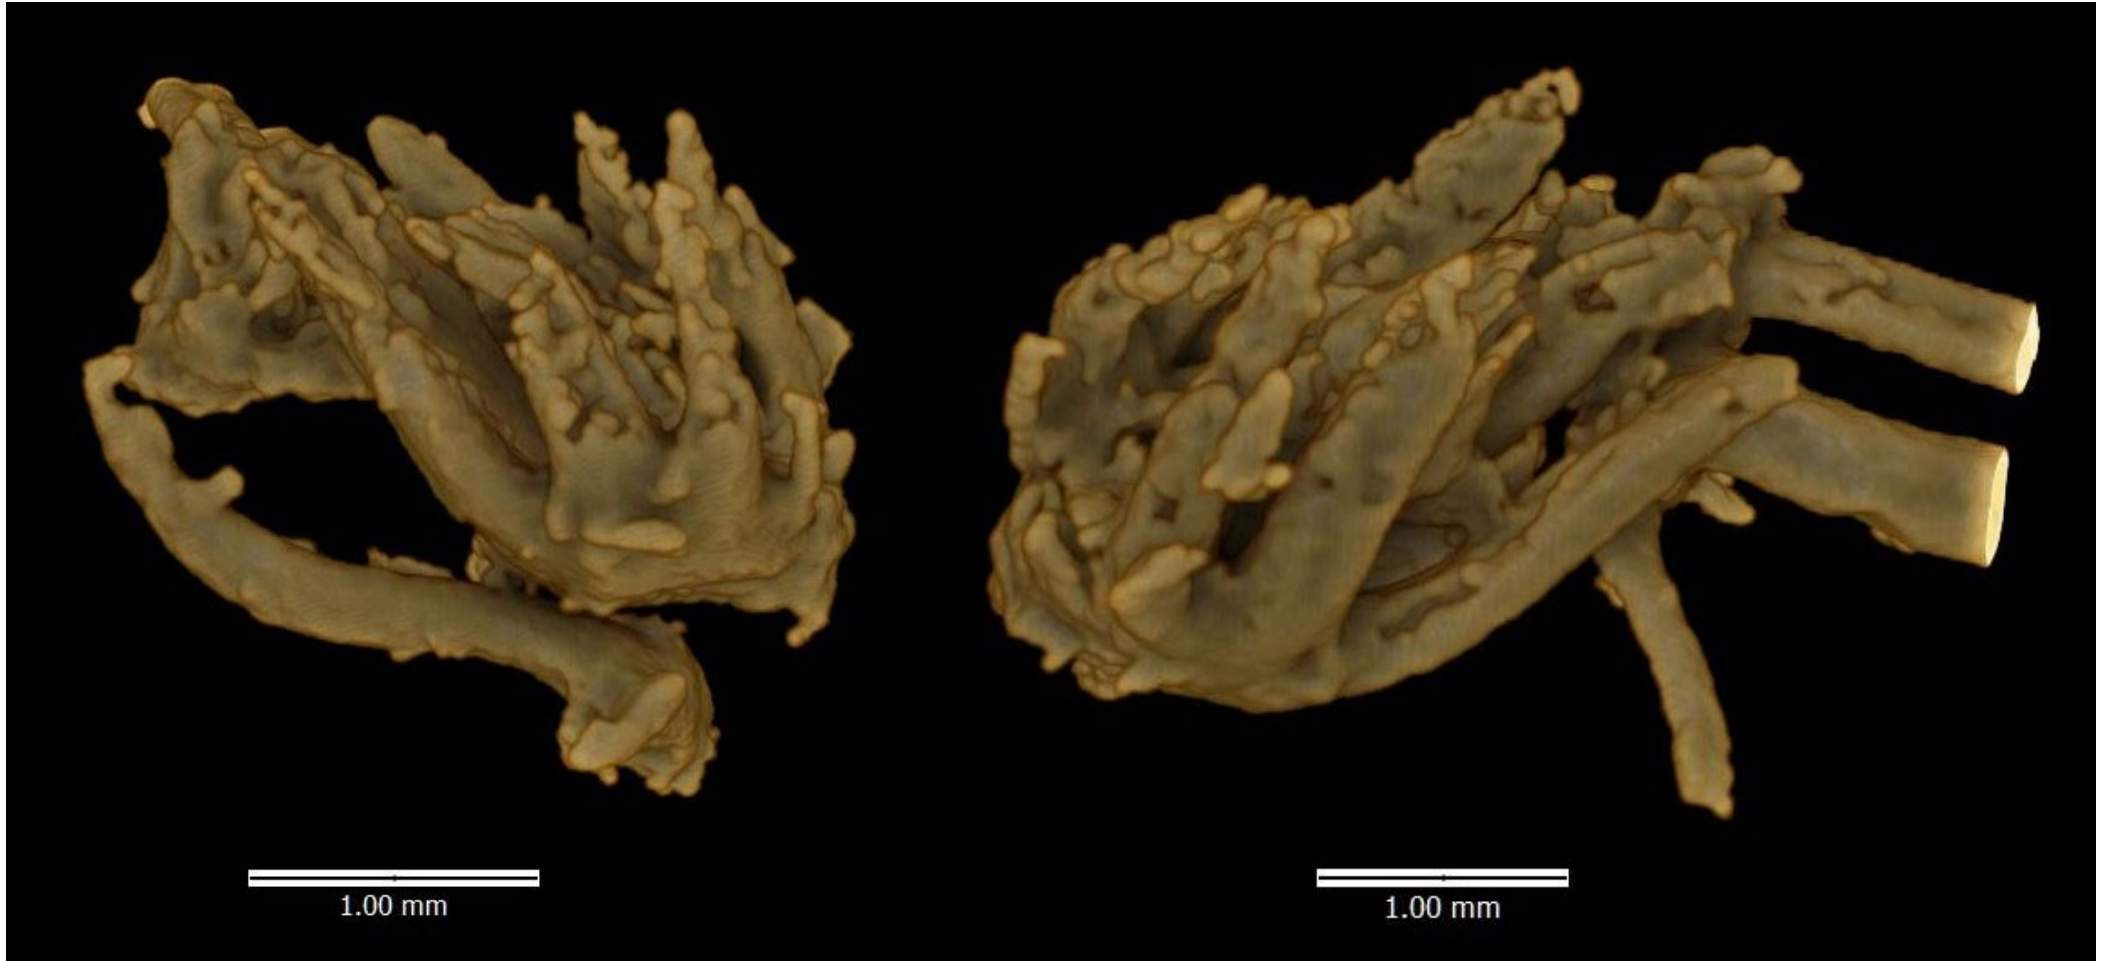

# Sherd 439

Decor:  
Pivoting impression  
A+B Leiterband with a  
multiple teeth (dots and  
dashes) comb

Impression pivotante  
A+B Leiterband avec un  
peigne à dents multiples  
mixtes.

<https://lampea.cnrs.fr/cerafim/spip.php?article242>

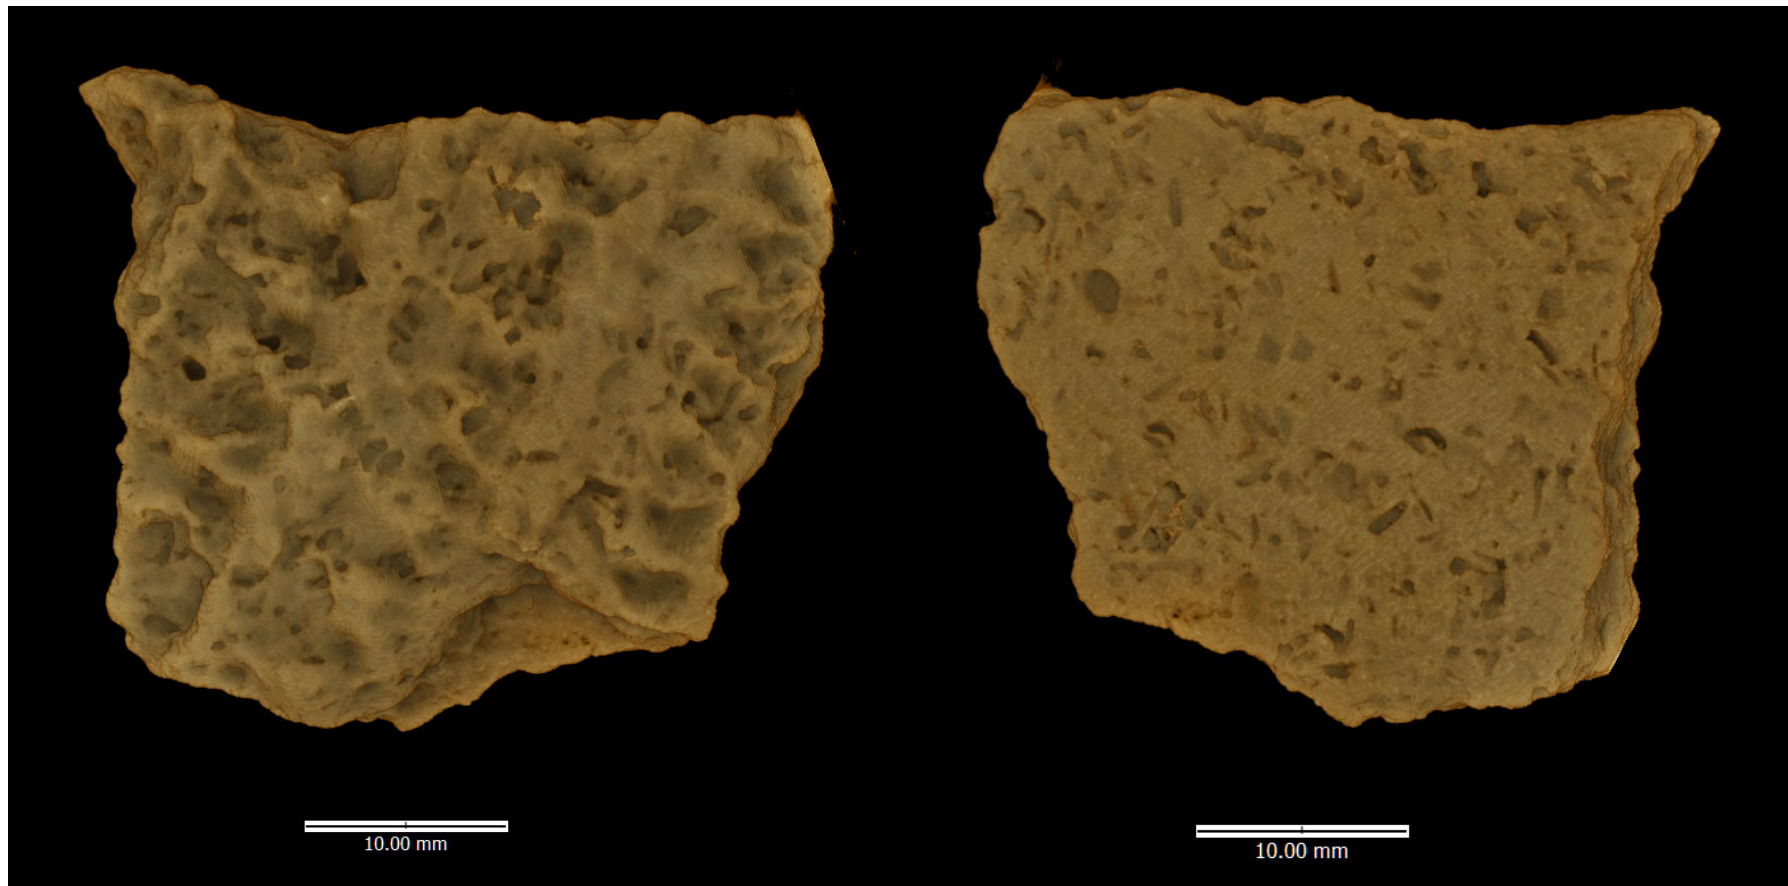

# Inclusion 3.

Involucre with smooth base (sessile).

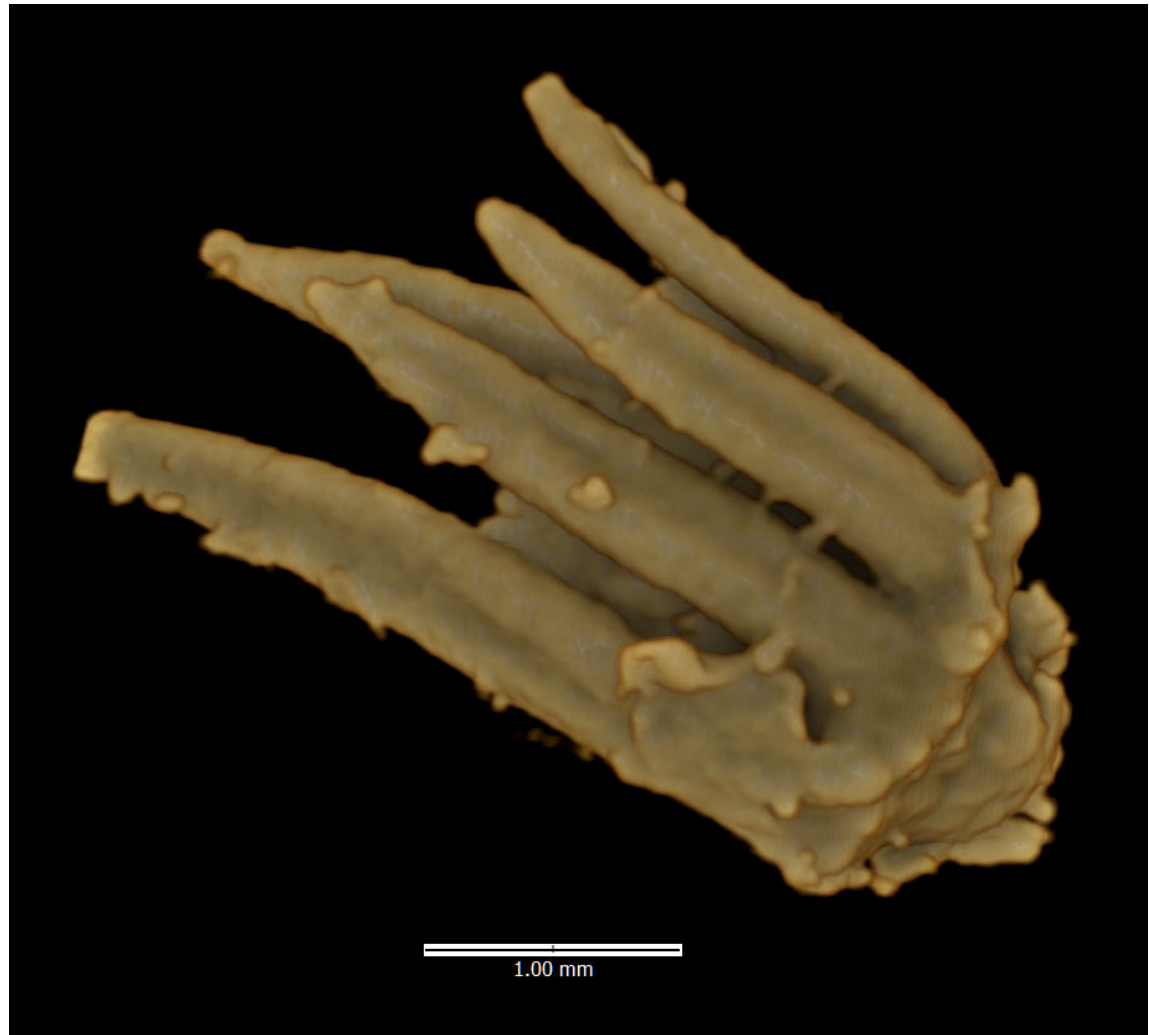

# Sherd 587

No diagnostic organic  
inclusions

Eroded surface  
Indetermined decor

Surface érodée,  
Décor non identifiable

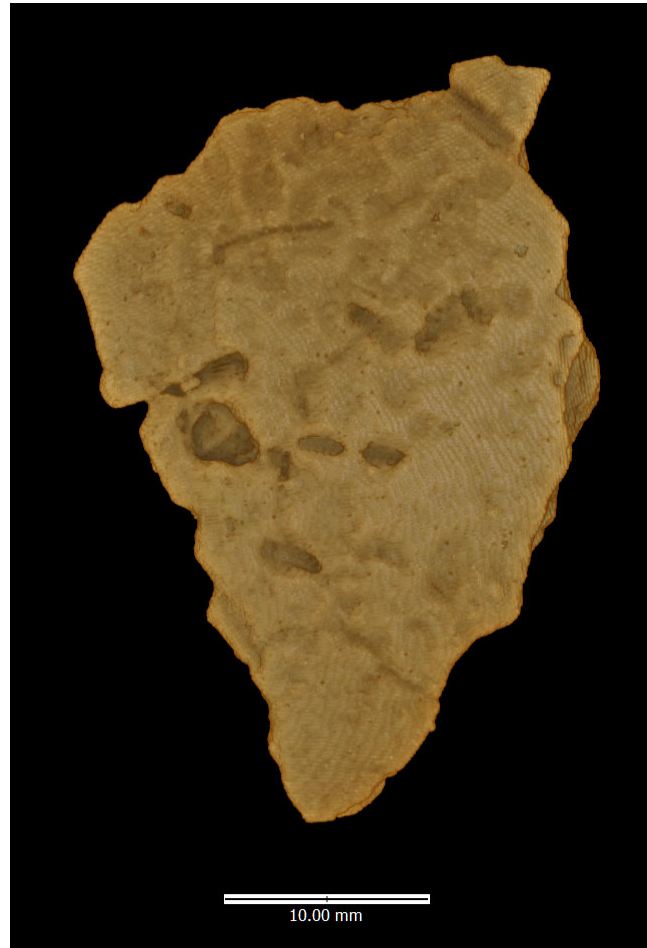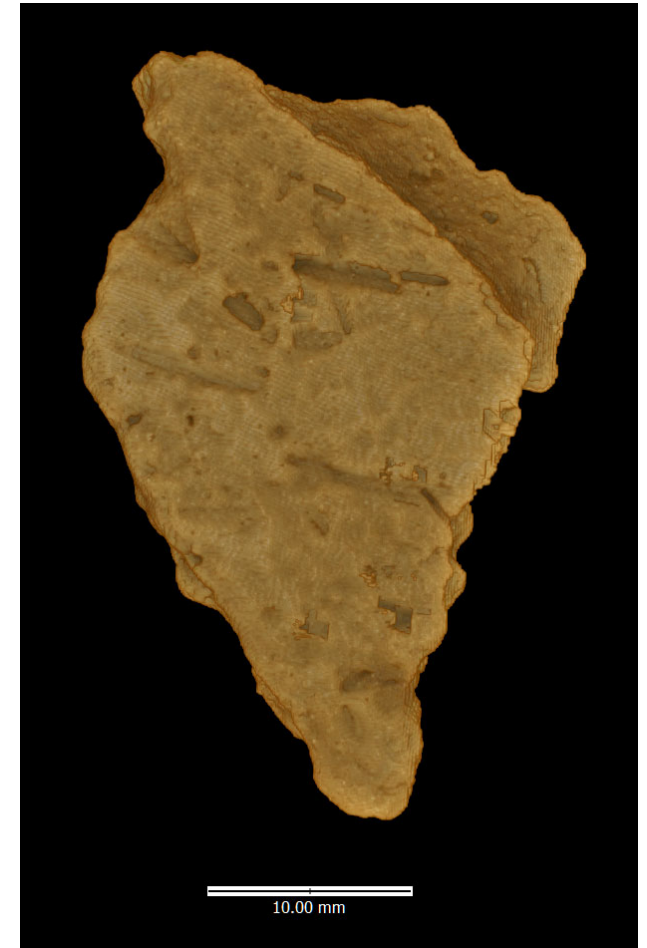

# Sherd 460

No diagnostic organic  
inclusions

Eroded surface  
Indetermined decor

Surface érodée,  
Décor non identifiable

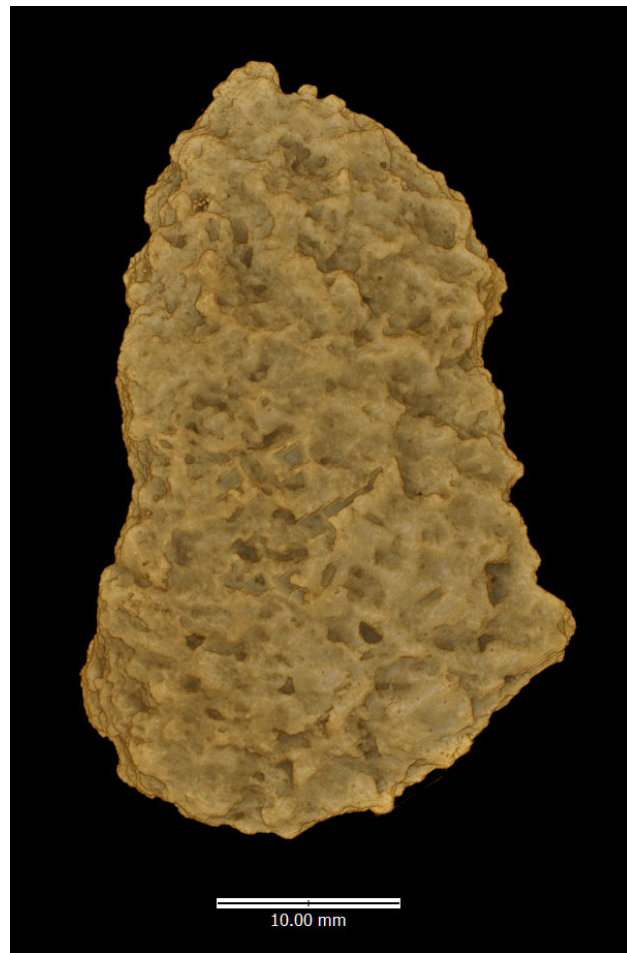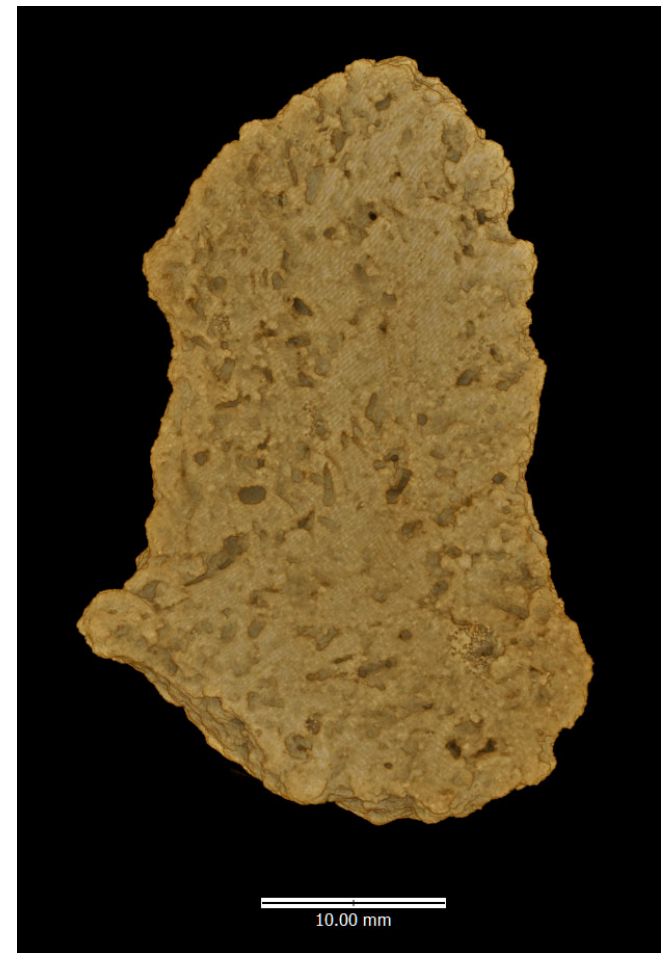

# Sherd 1324

No diagnostic organic  
inclusions

Décor:  
Simple or pivoting impression A+B with  
a rectilinear edge spatula

Impression simple ou pivotante avec  
spatule à front droit

[https://lampea.cnrs.fr/cerafim/spip.php?  
article238](https://lampea.cnrs.fr/cerafim/spip.php?article238)

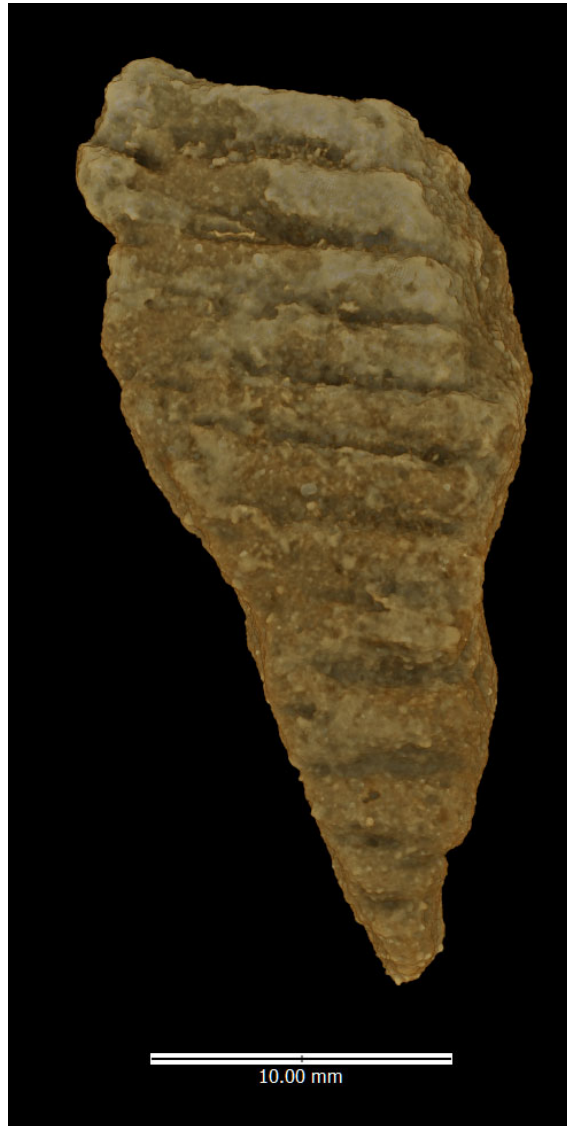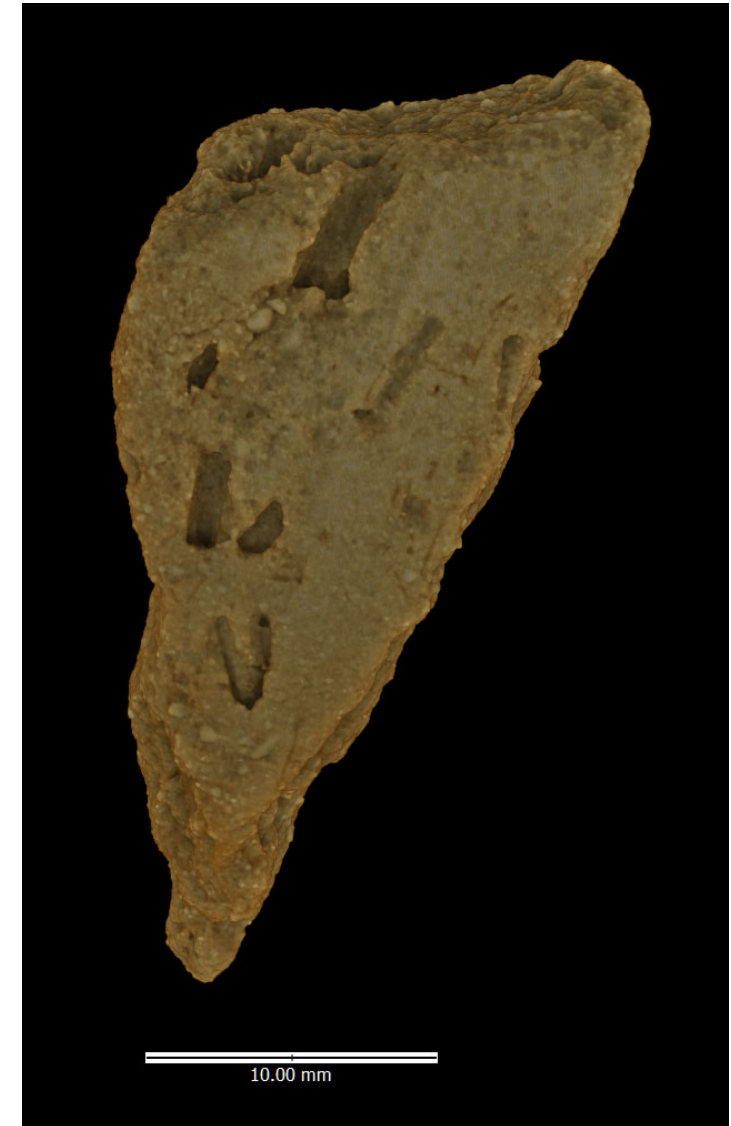

# AZ22

## Sherd 27

Décor:

Pivoting impression A+B with a  
multiple teeth (dashes) comb

Impression pivotante A+B avec  
peigne à dents multiples plates

<https://lampea.cnrs.fr/cerafim/spip.php?article240>

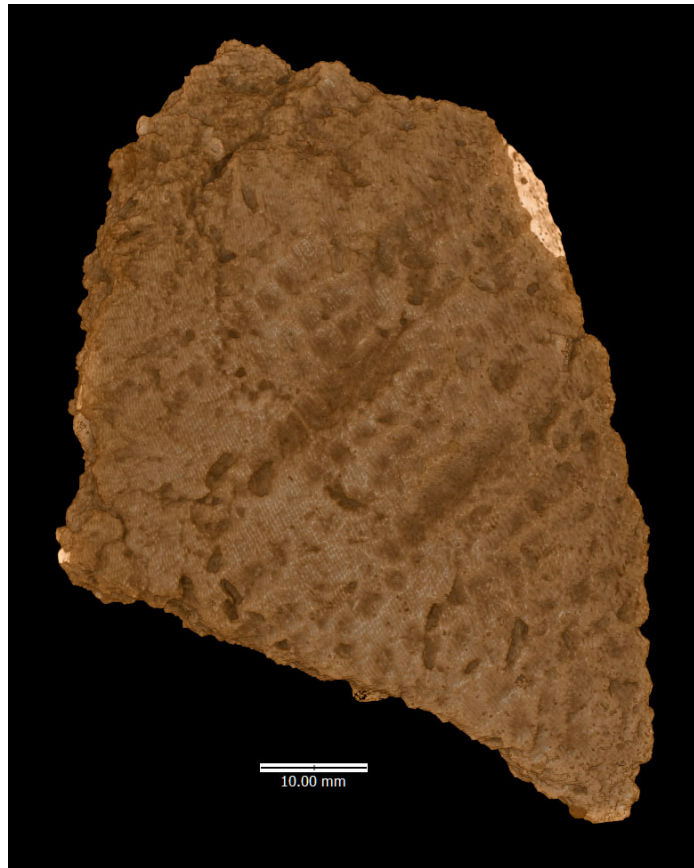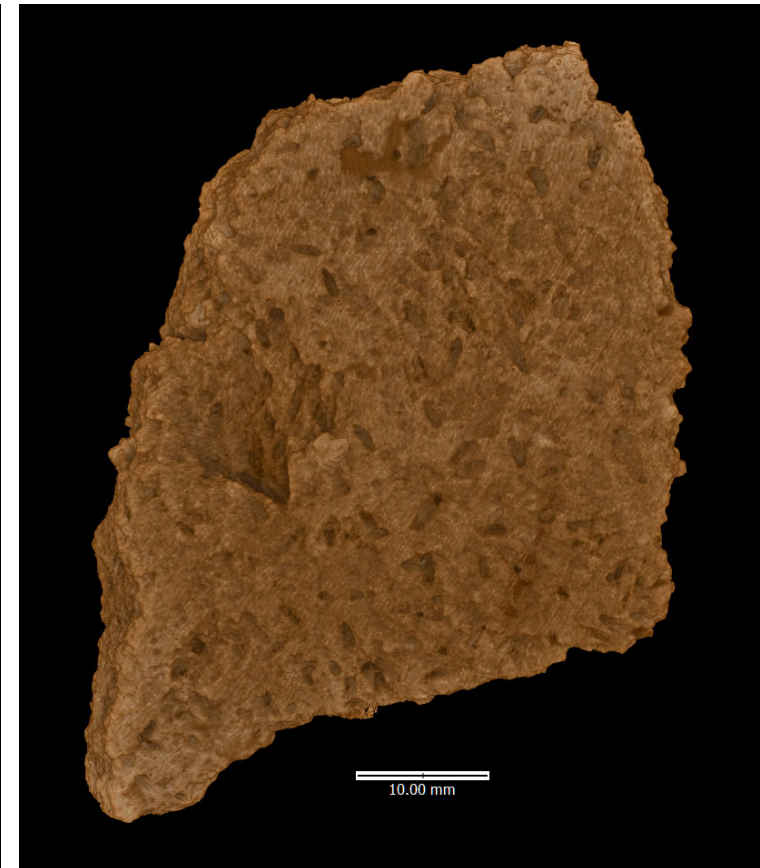



# Inclusion 1. Two views: Sessile involucre, solitary spikelet

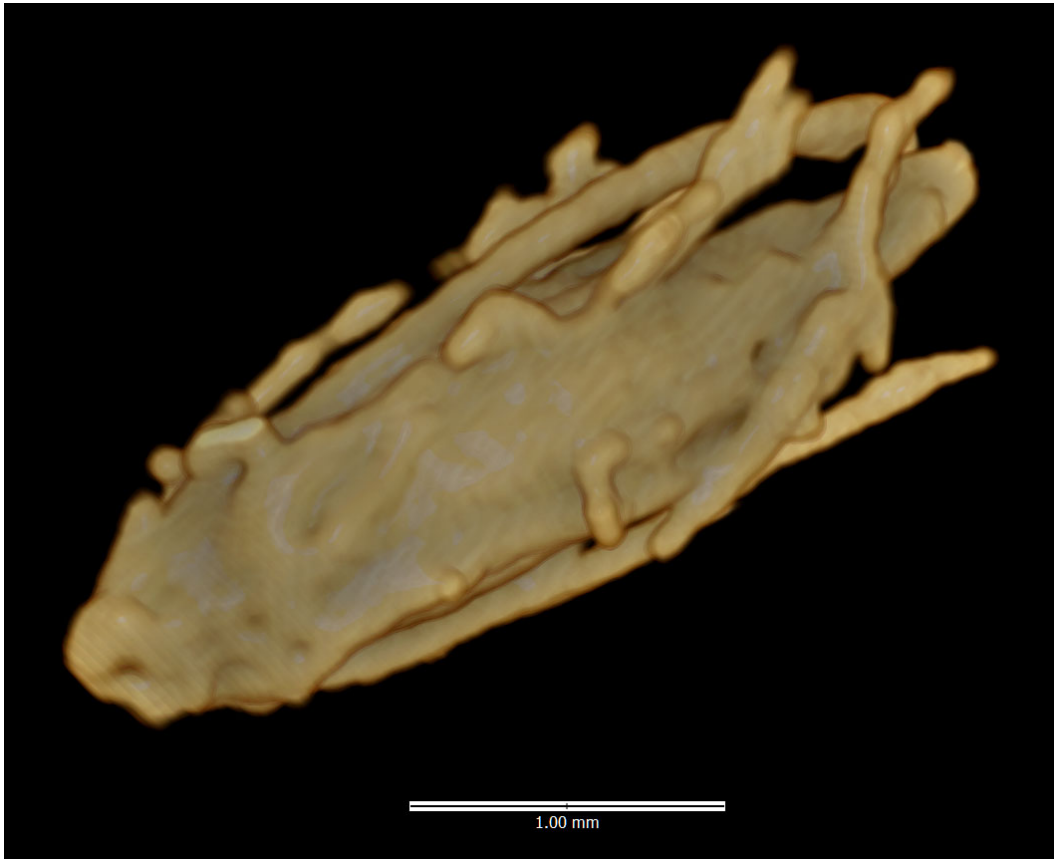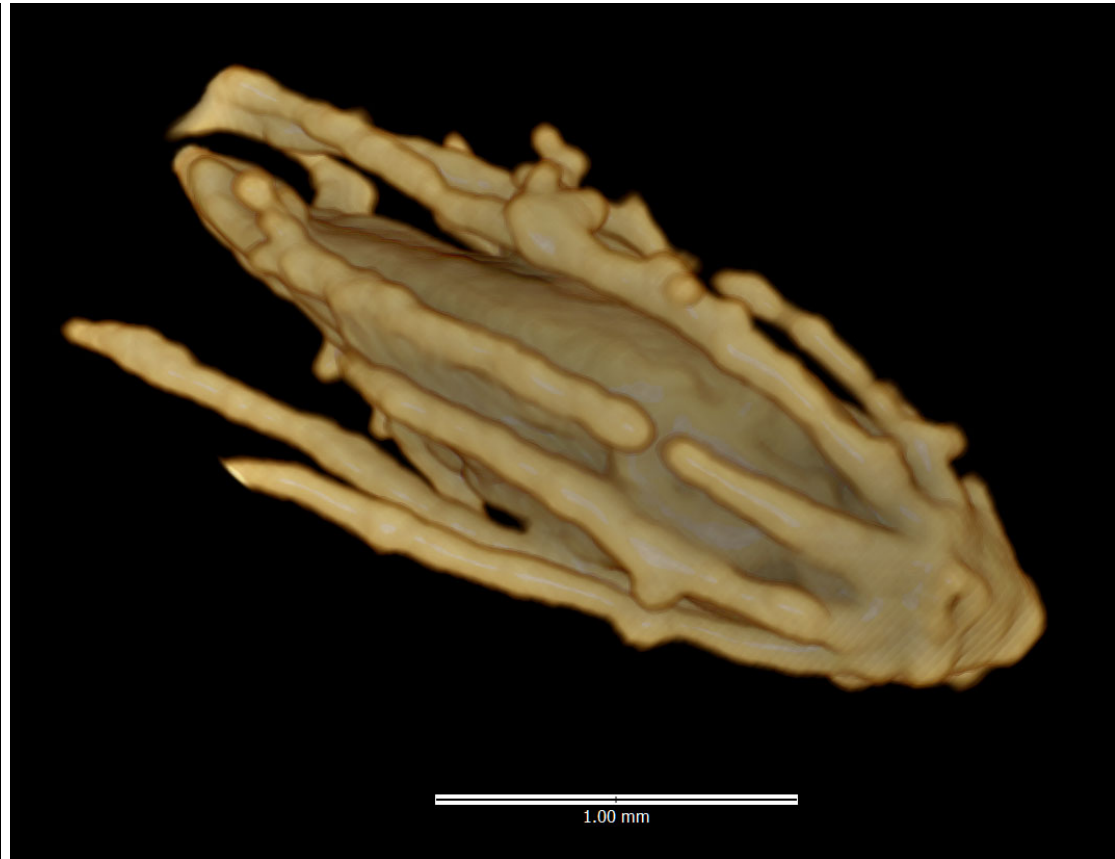

# Inclusion 4a. Two views: Sessile involucre, solitary spikelet

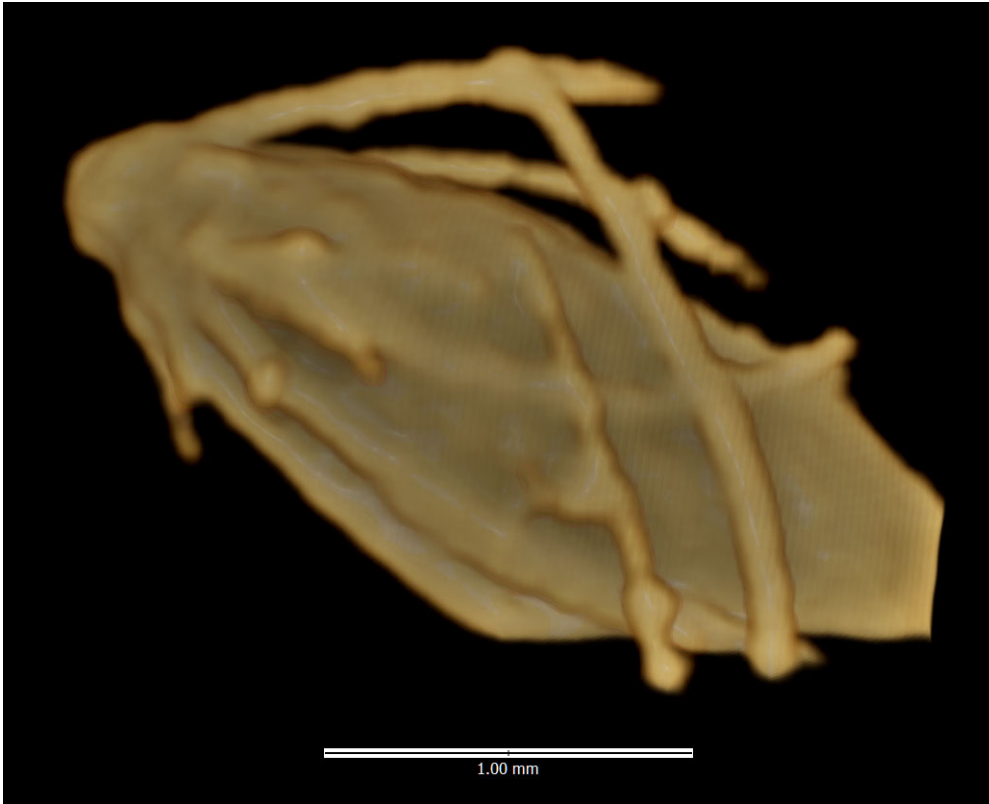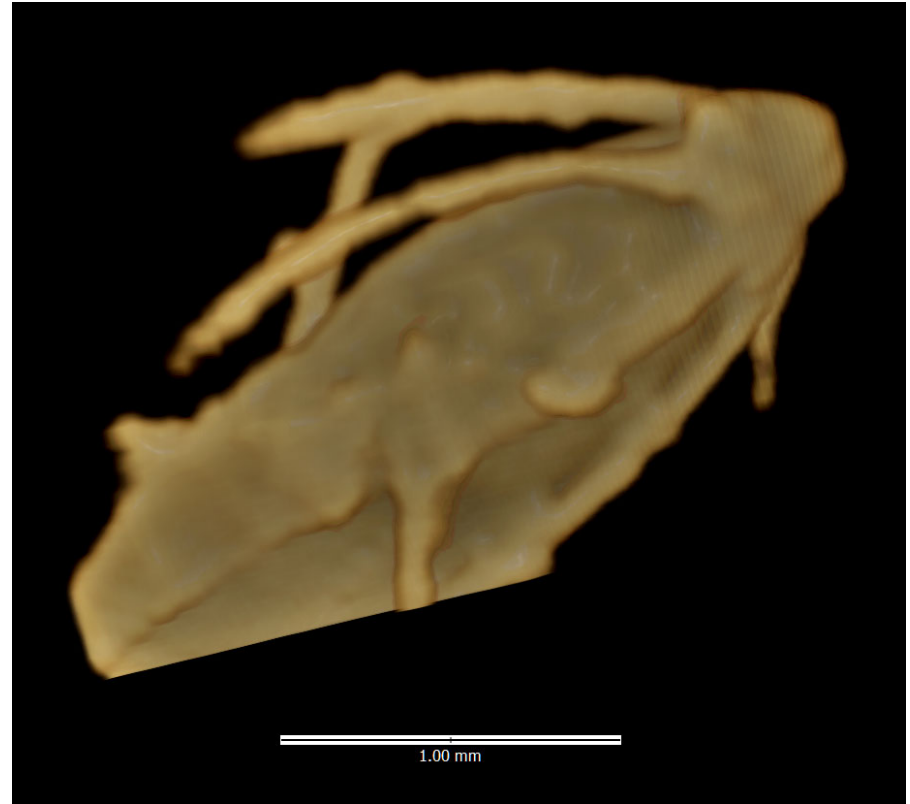

# Inclusion 5. Two views: Sessile involucre, solitary spikelet

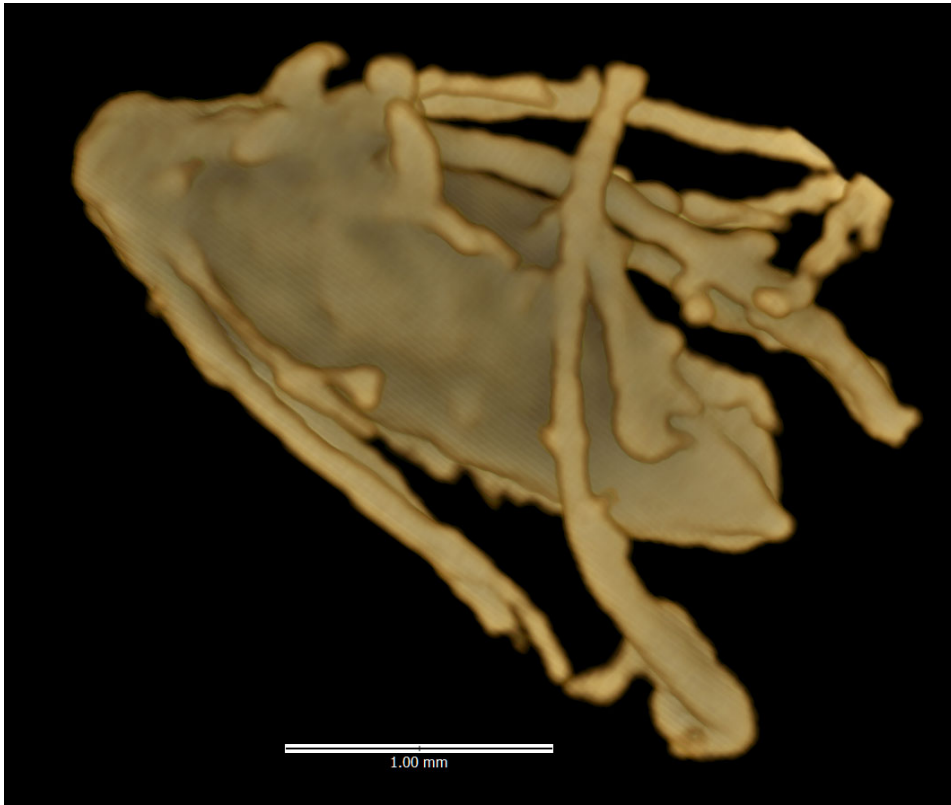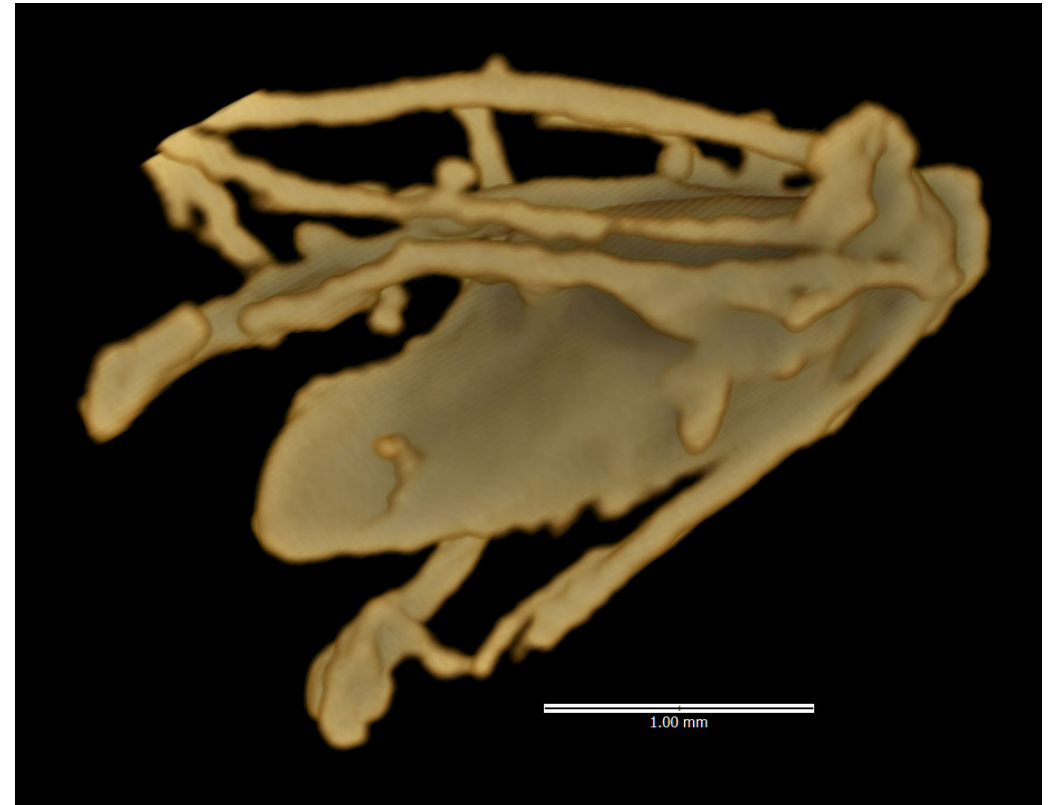

# Inclusion 7. Two views: Sessile involucre, solitary spikelet

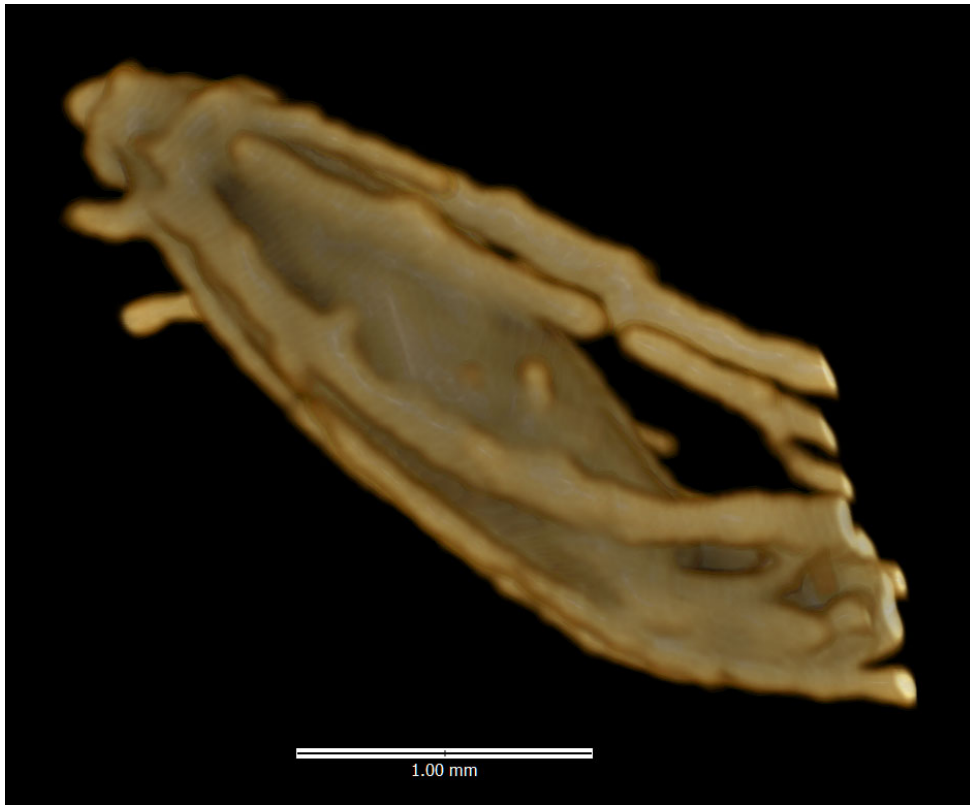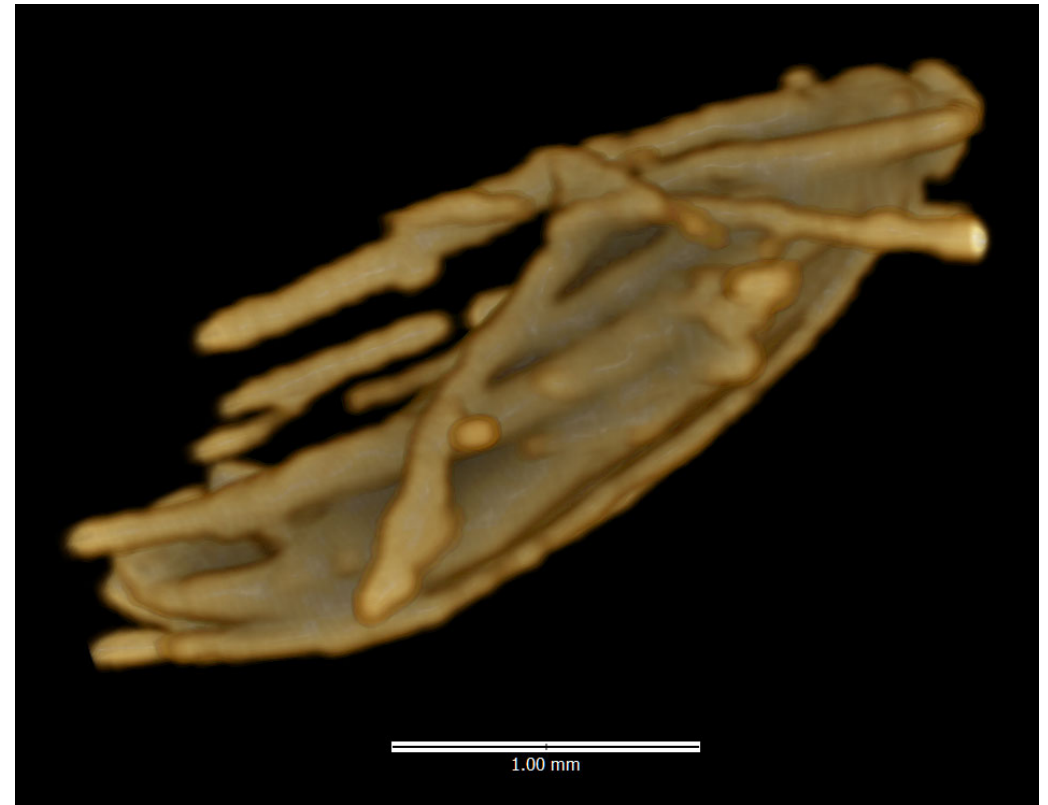

# Inclusion 8. Two views: Sessile involucre, solitary spikelet

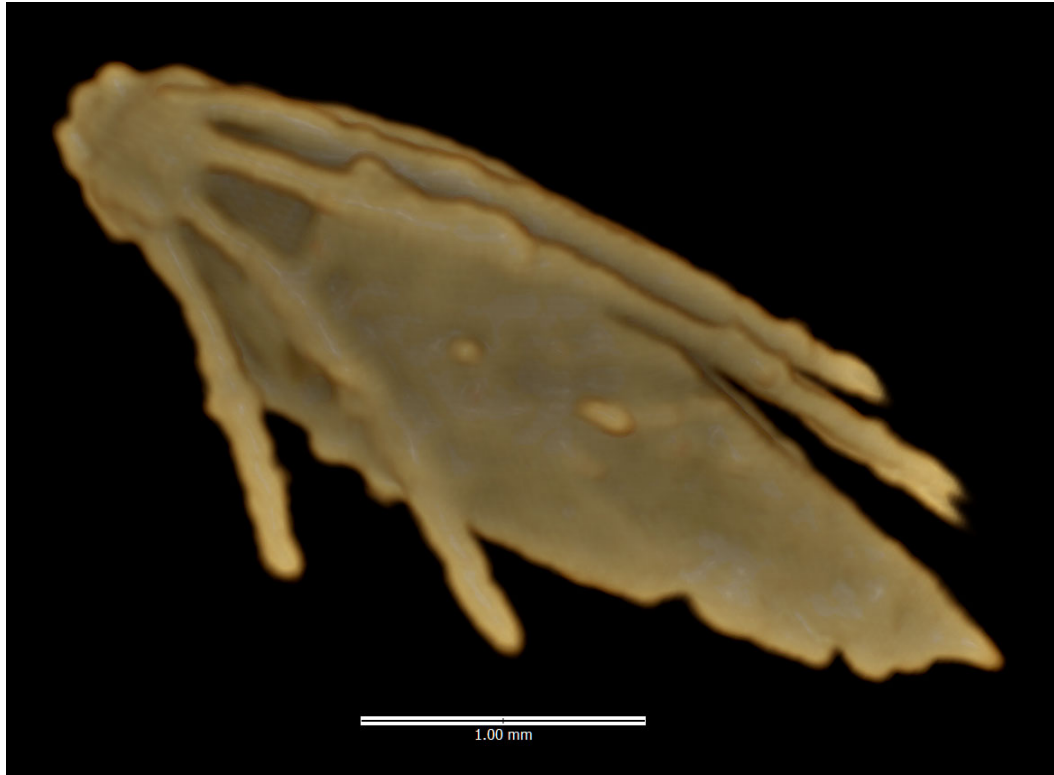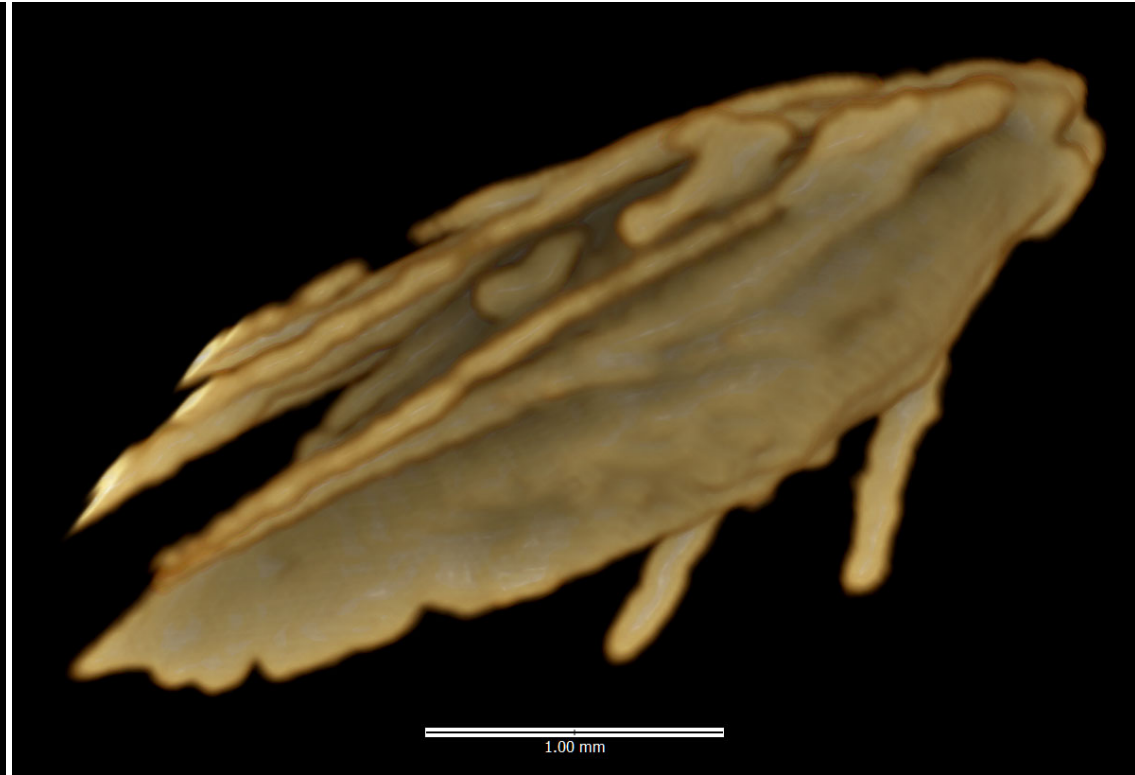

# Inclusion 9. Two views: Sessile involucre, solitary spikelet

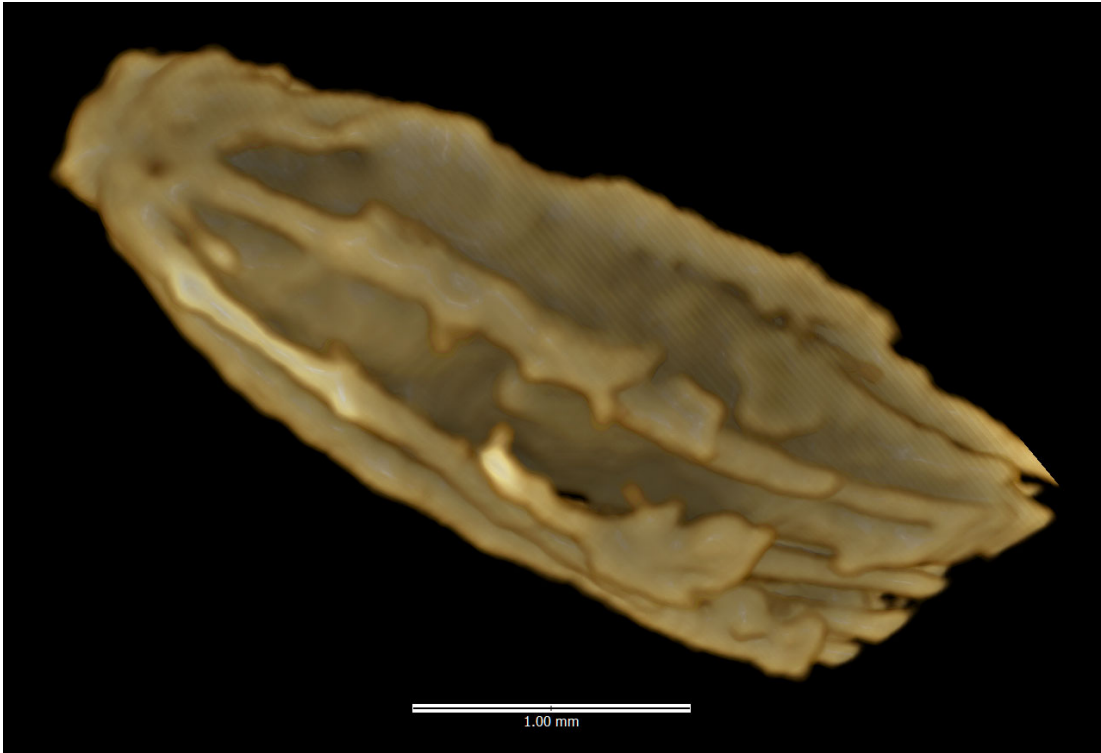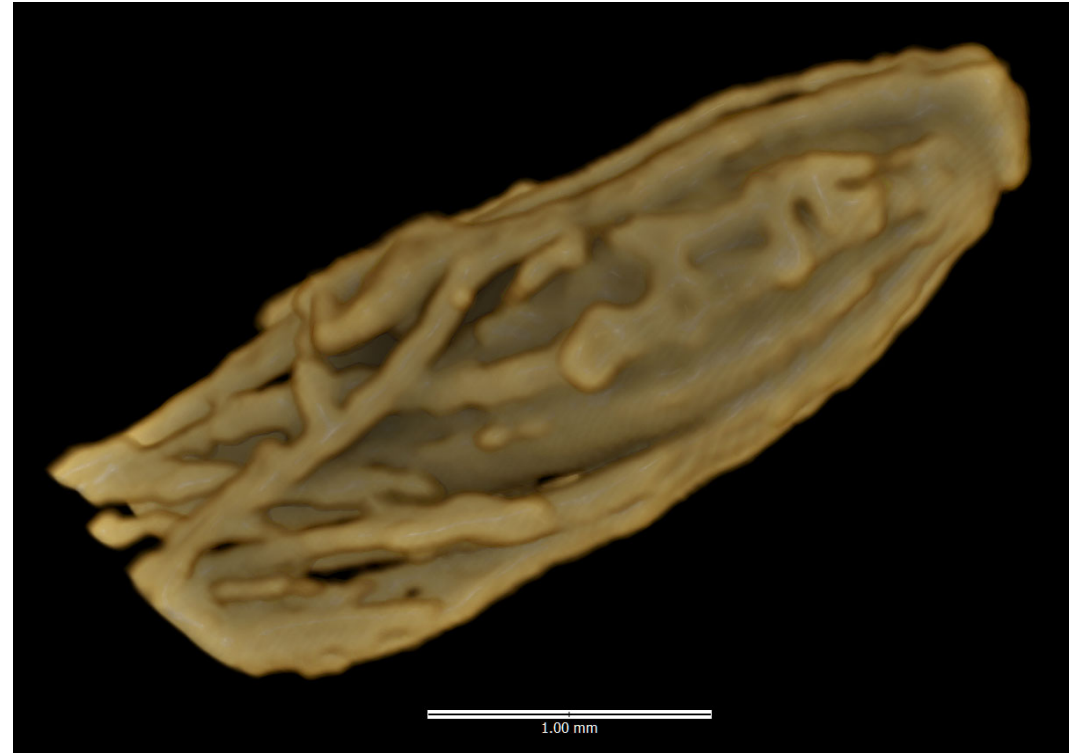

# Inclusion 11. Two views: Sessile involucre, solitary spikelet

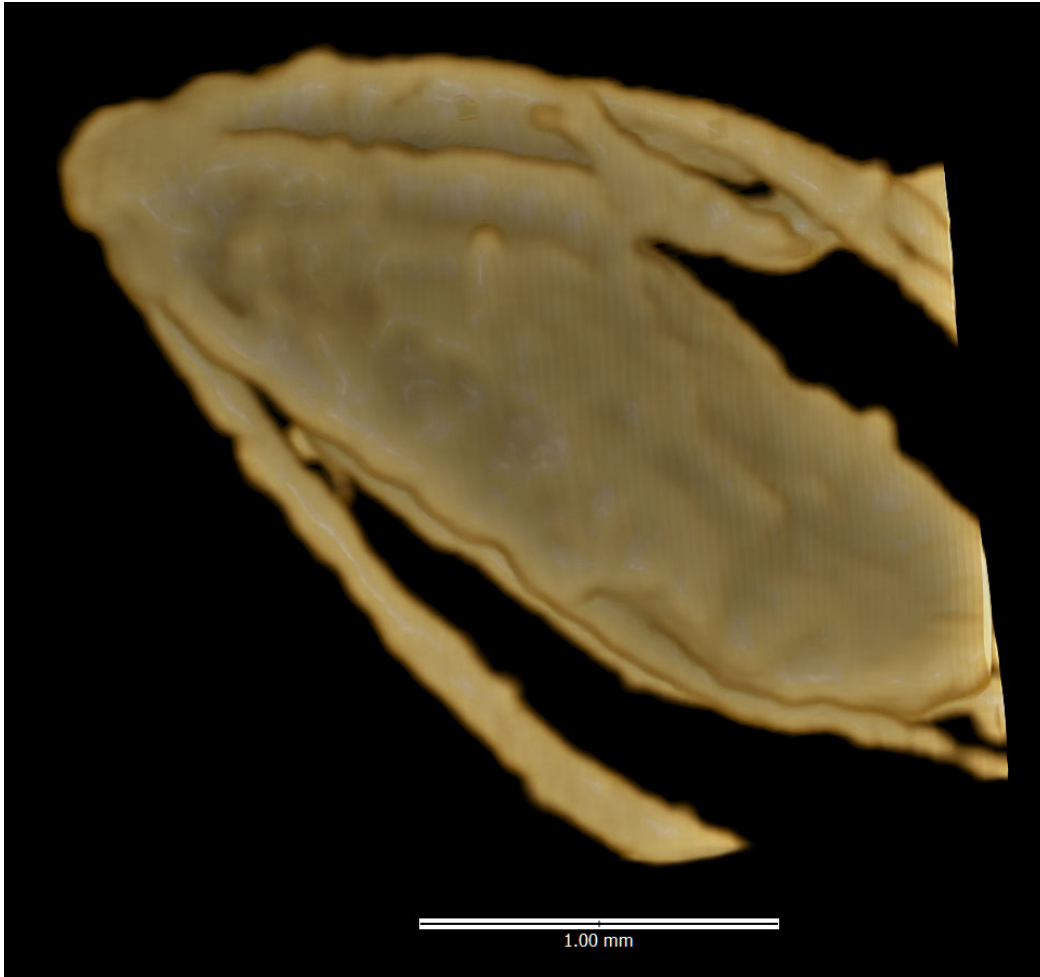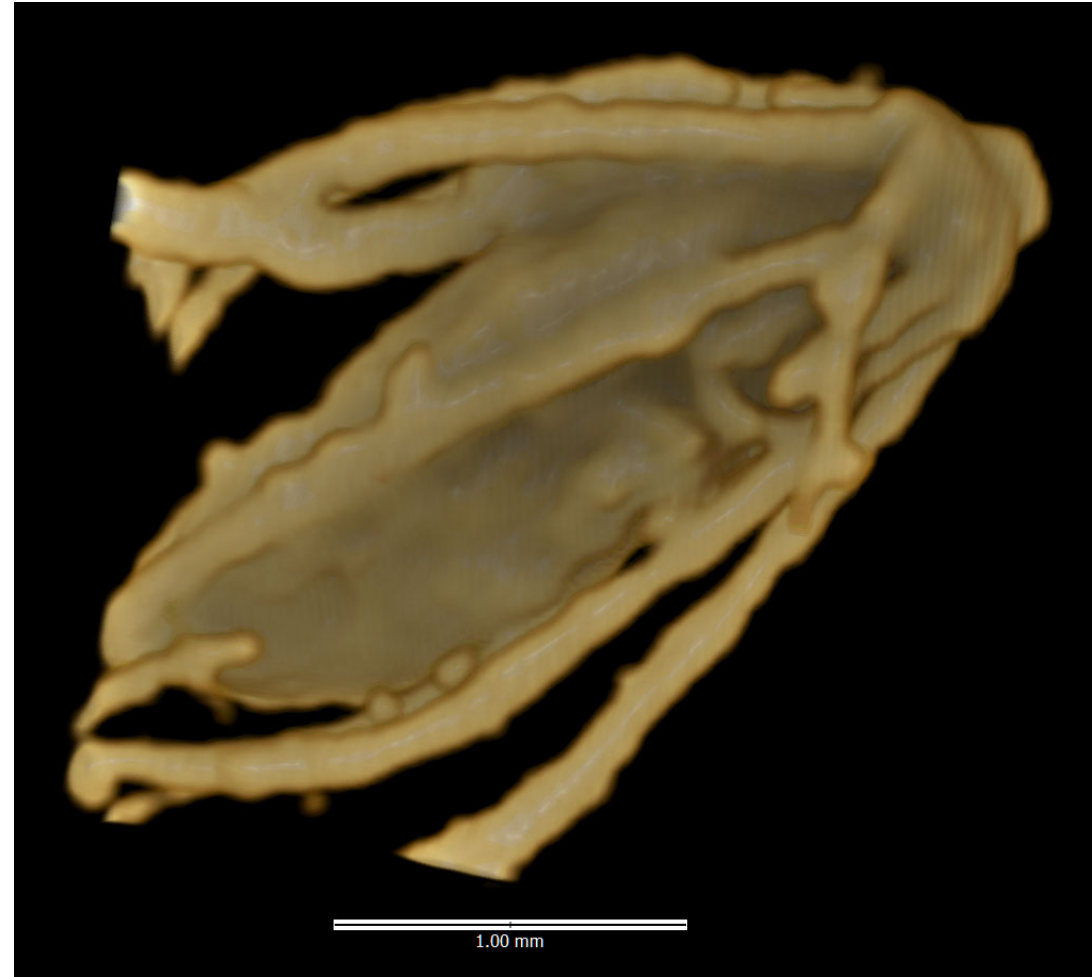

# Inclusion 12. Two views: Sessile involucre, solitary spikelet

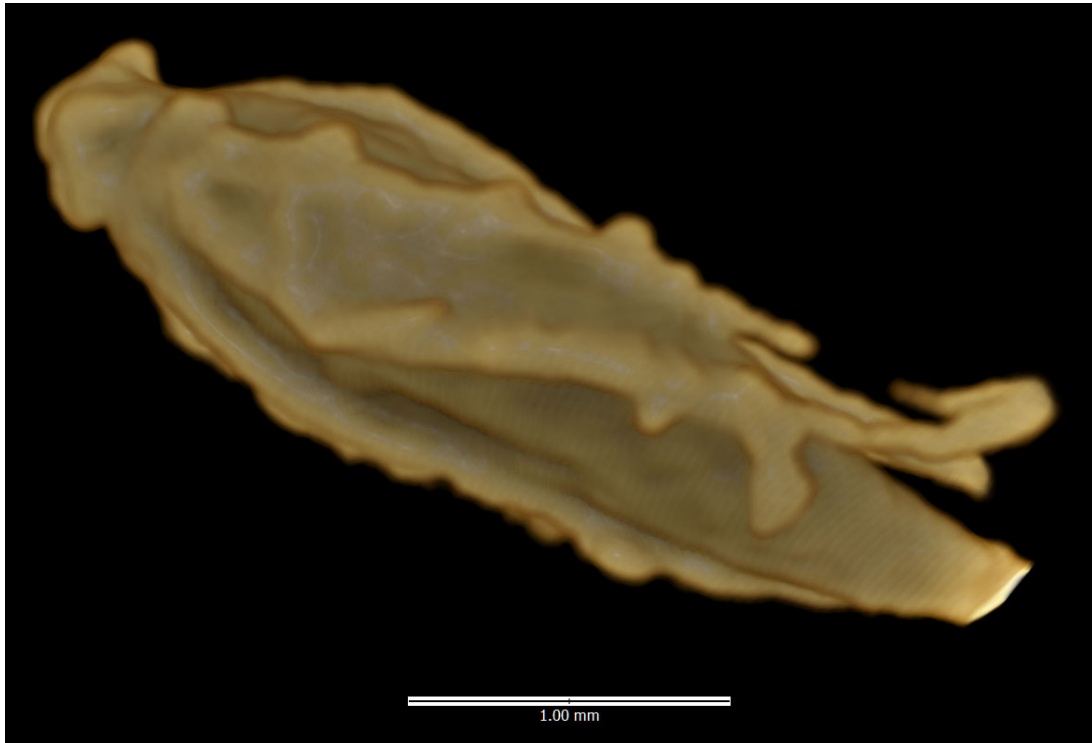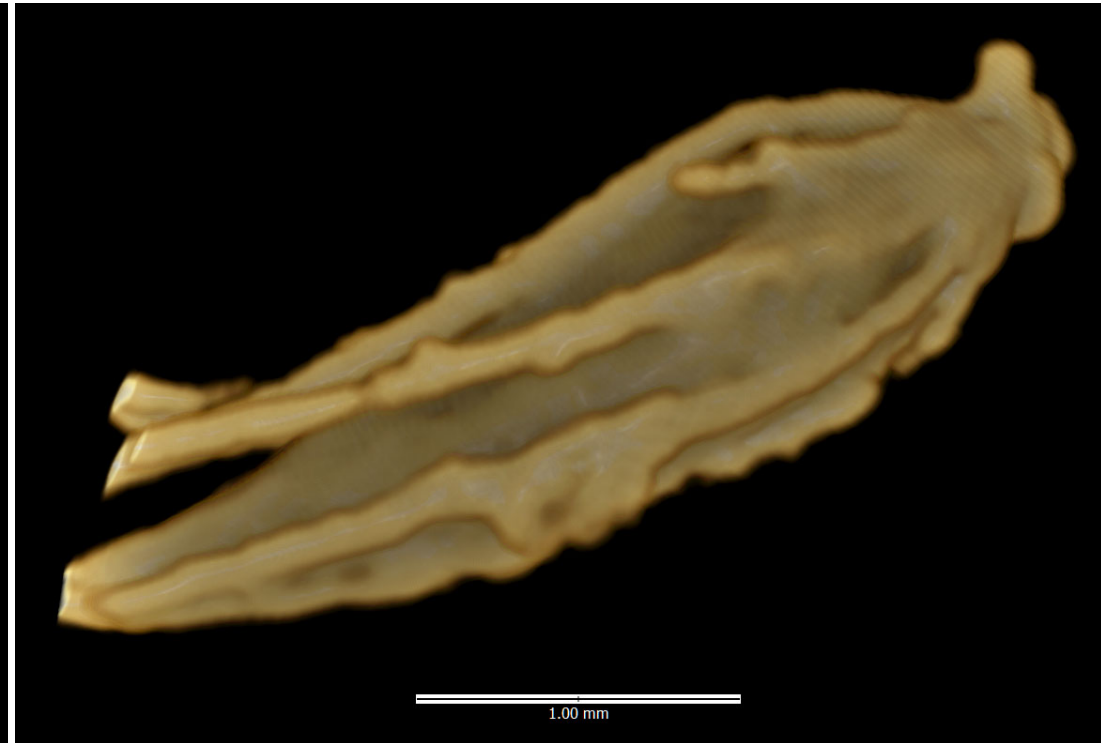



# Inclusion 13. Two views: Sessile involucre, solitary spikelet

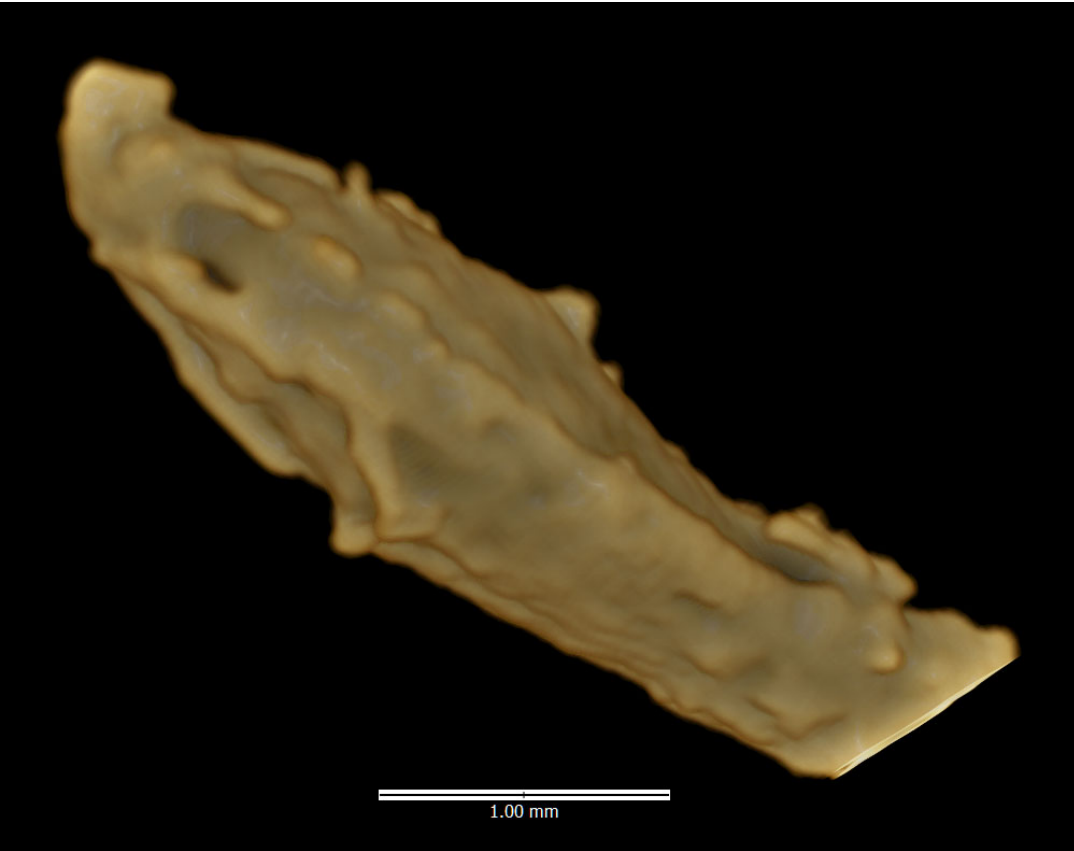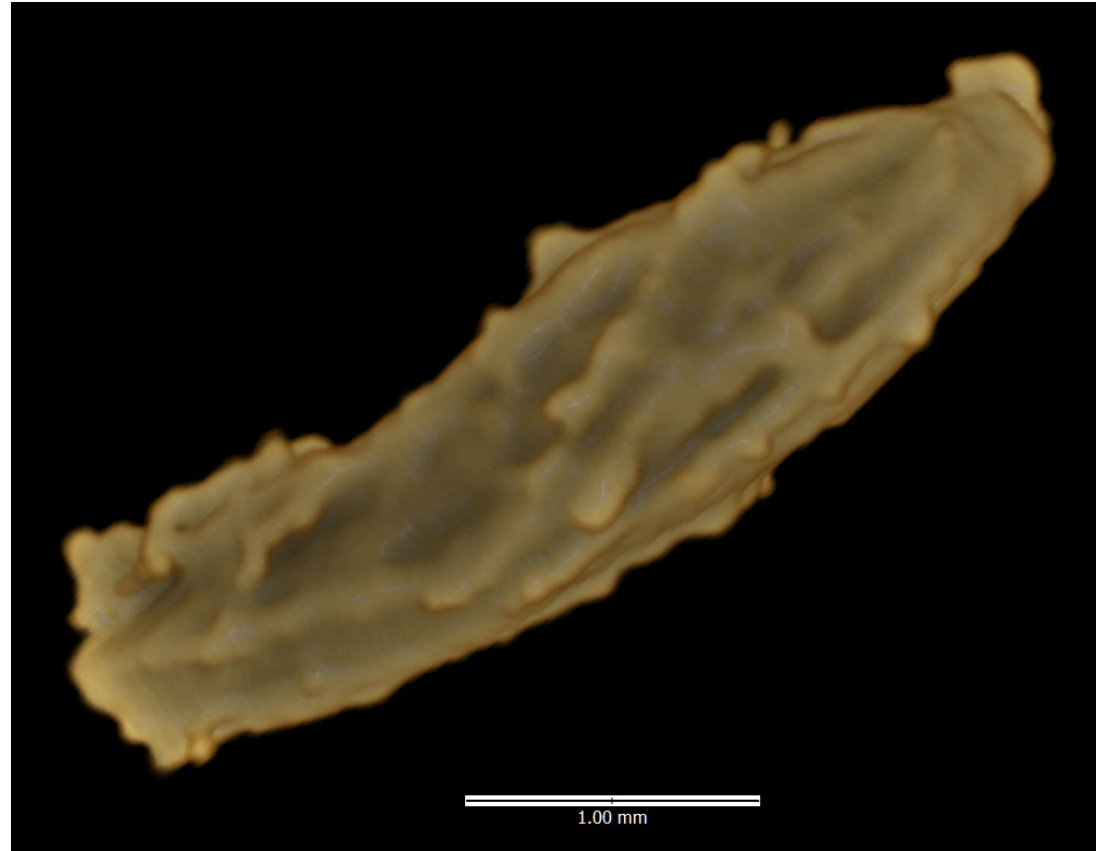

# Inclusion 14. Two views: Sessile involucre, solitary spikelet

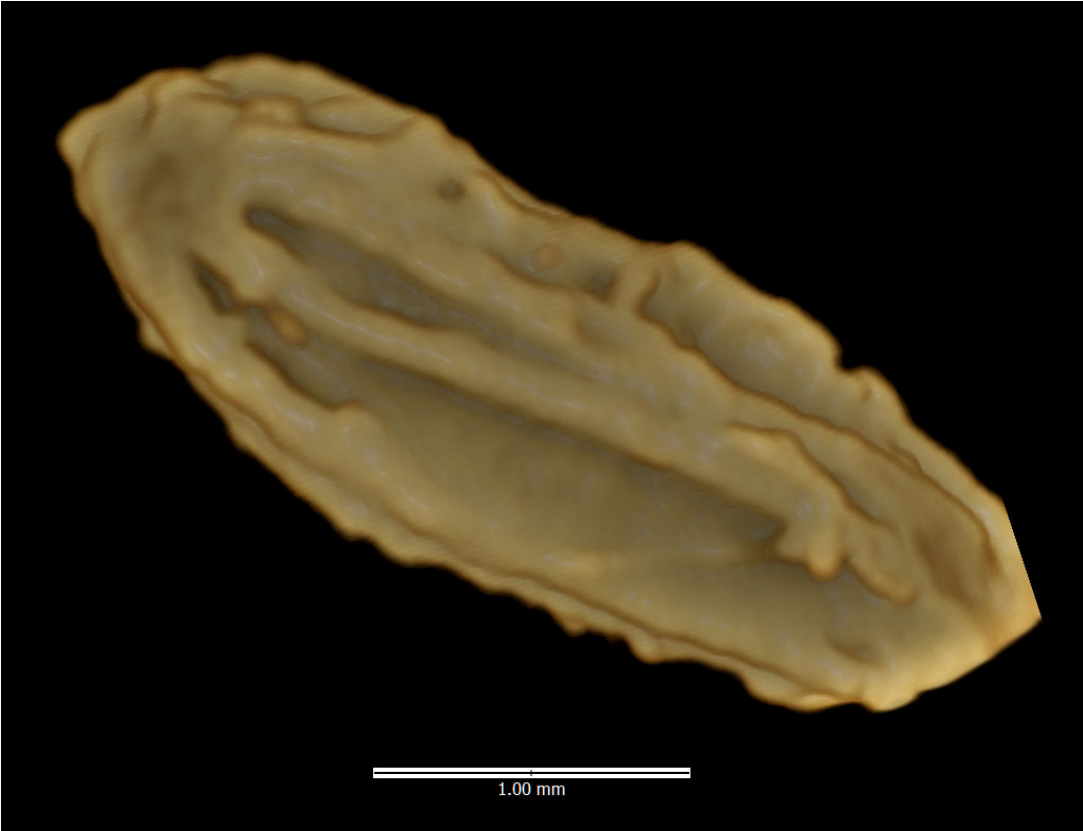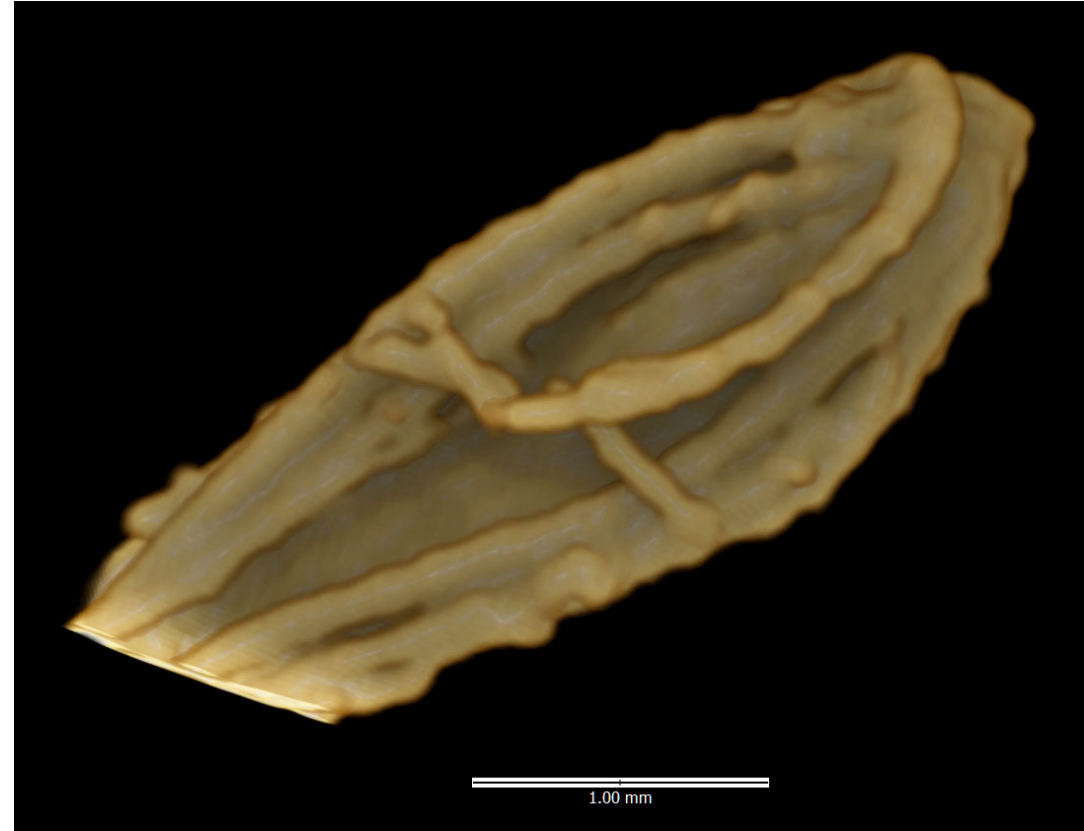

# Inclusion 15. Two views: Sessile involucre, solitary spikelet

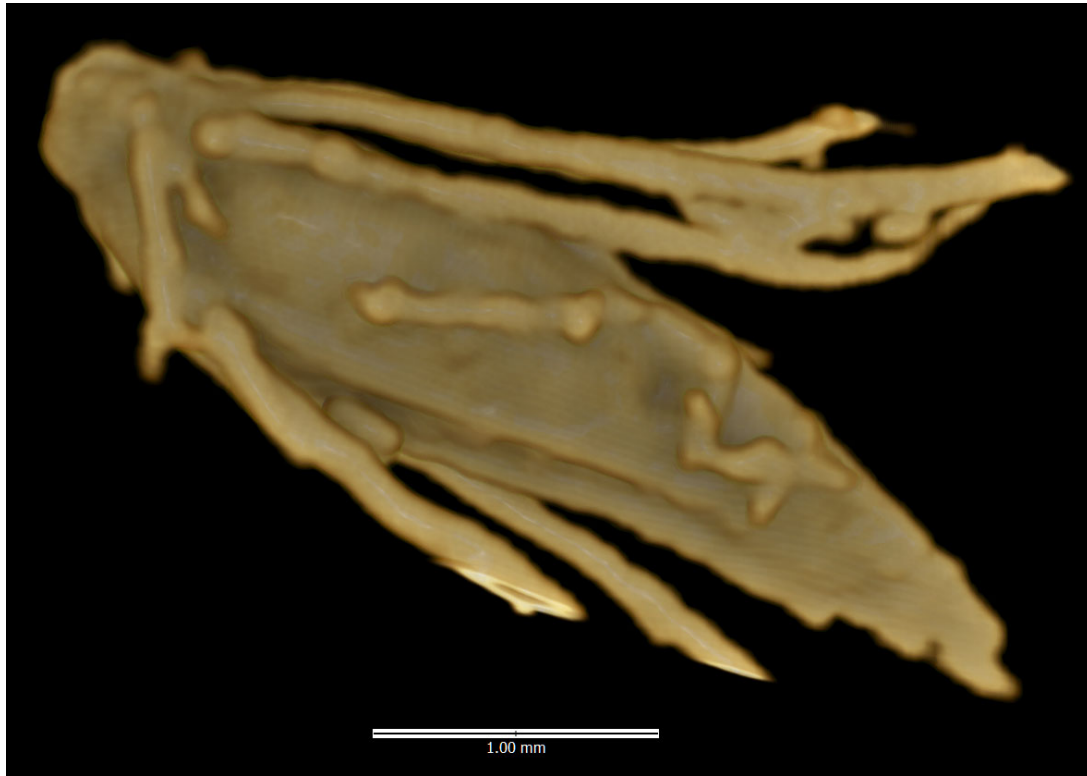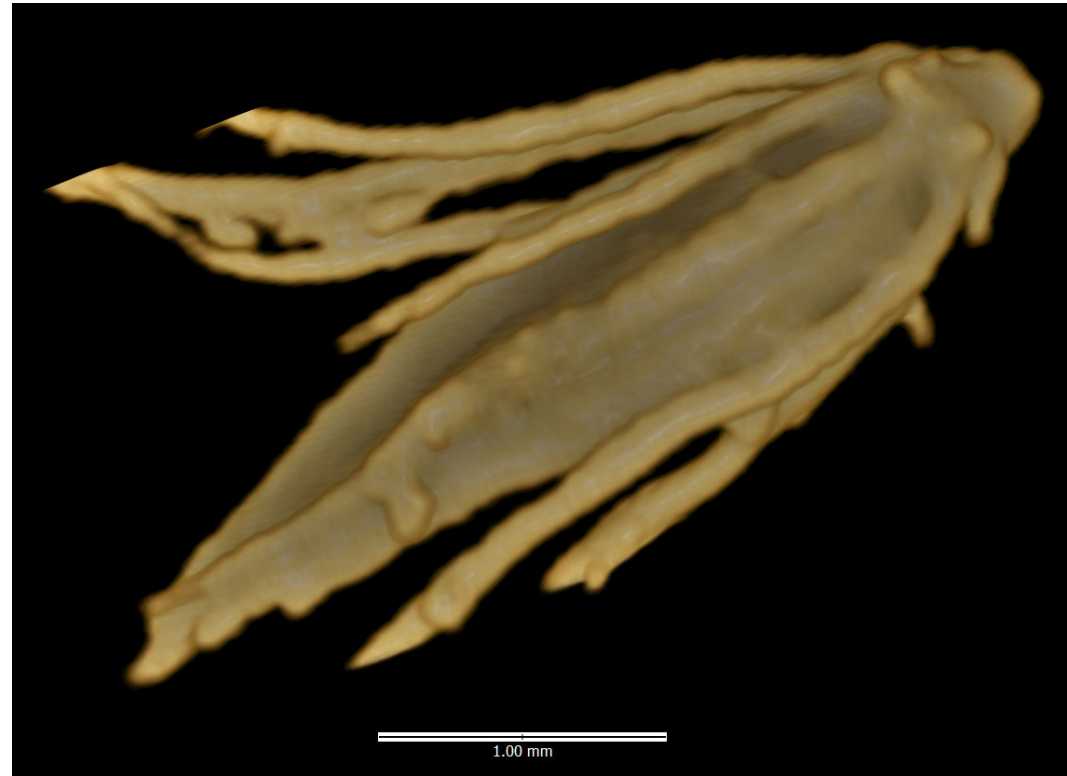

# Inclusion 16. Two views: Sessile involucre, solitary spikelet

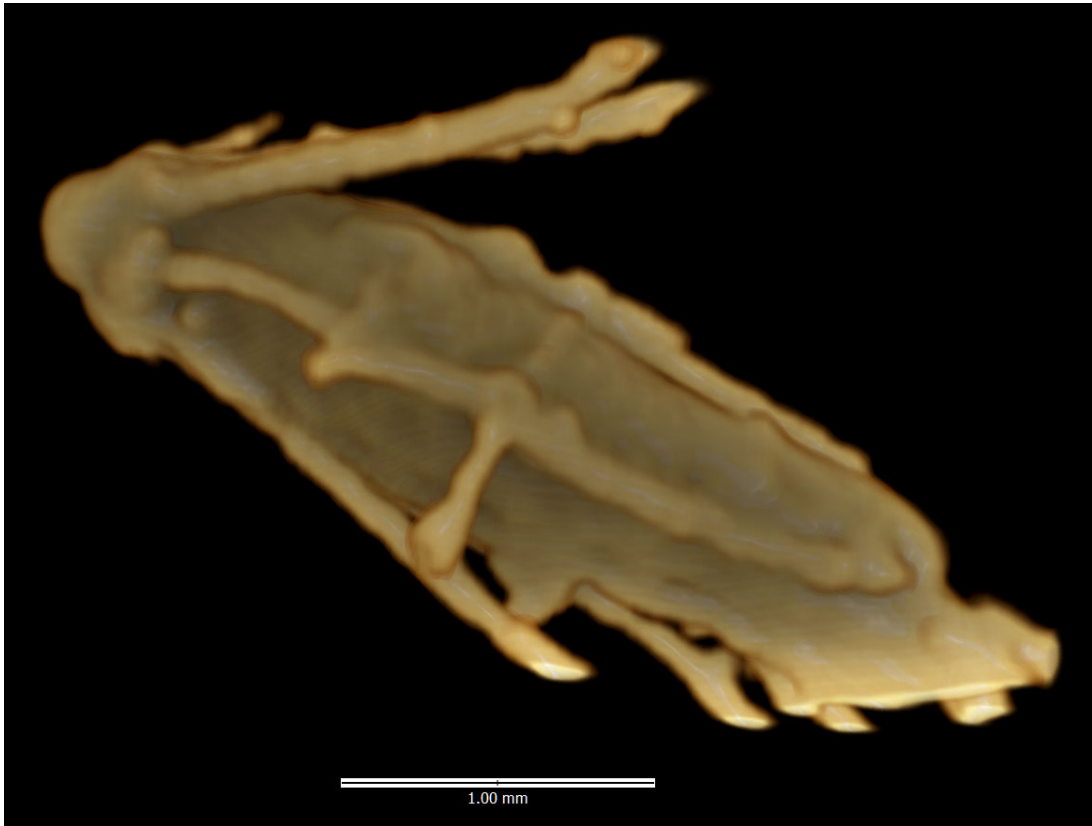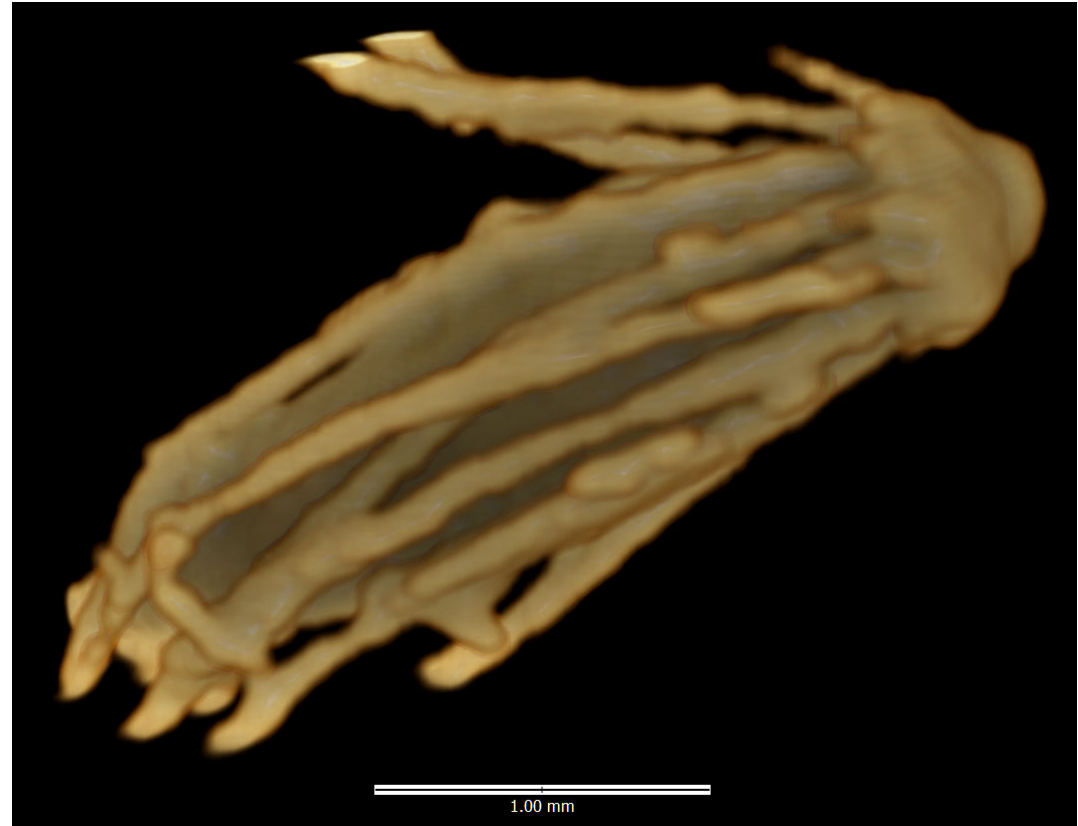

# Inclusion 17. Two views: Sessile involucre, solitary spikelet

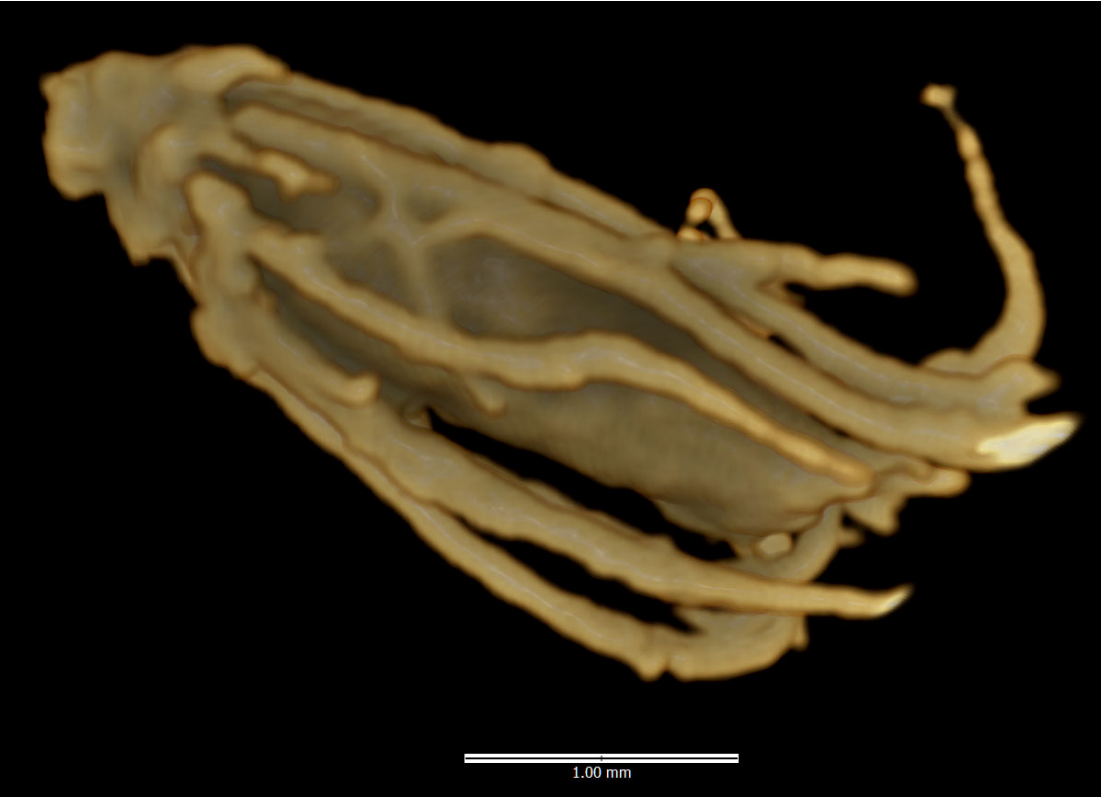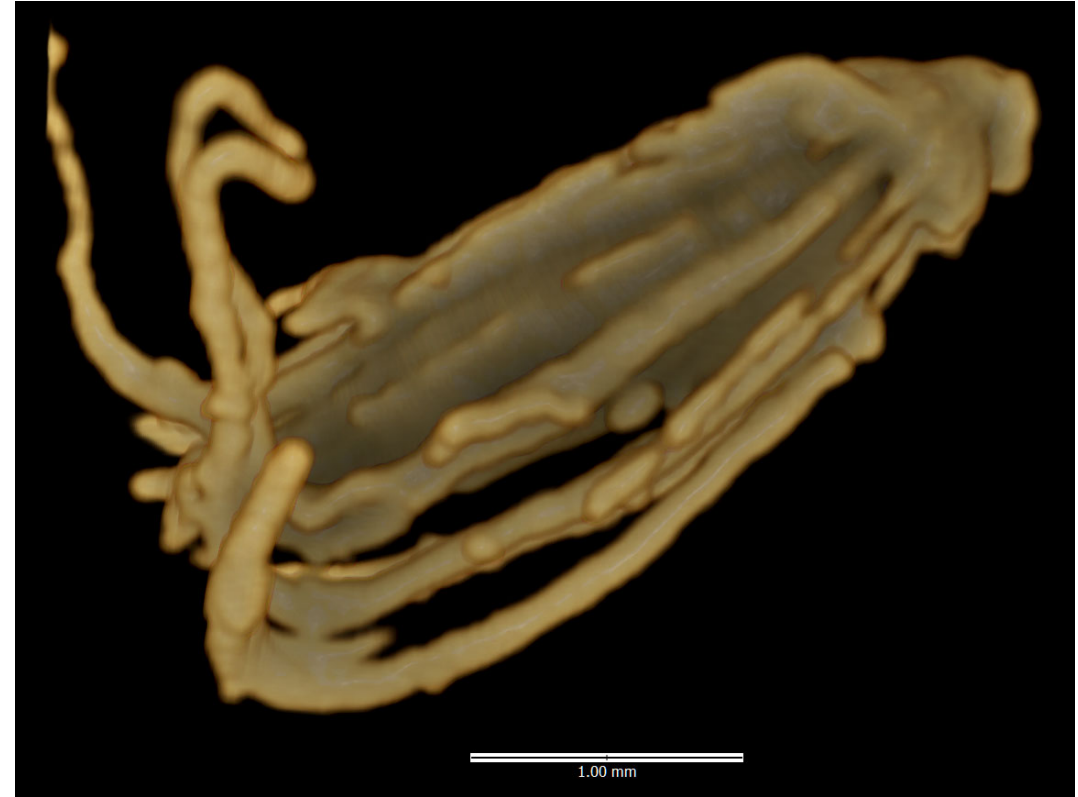

# Inclusion 19. involucre, indeterminate attachment, solitary spikelet

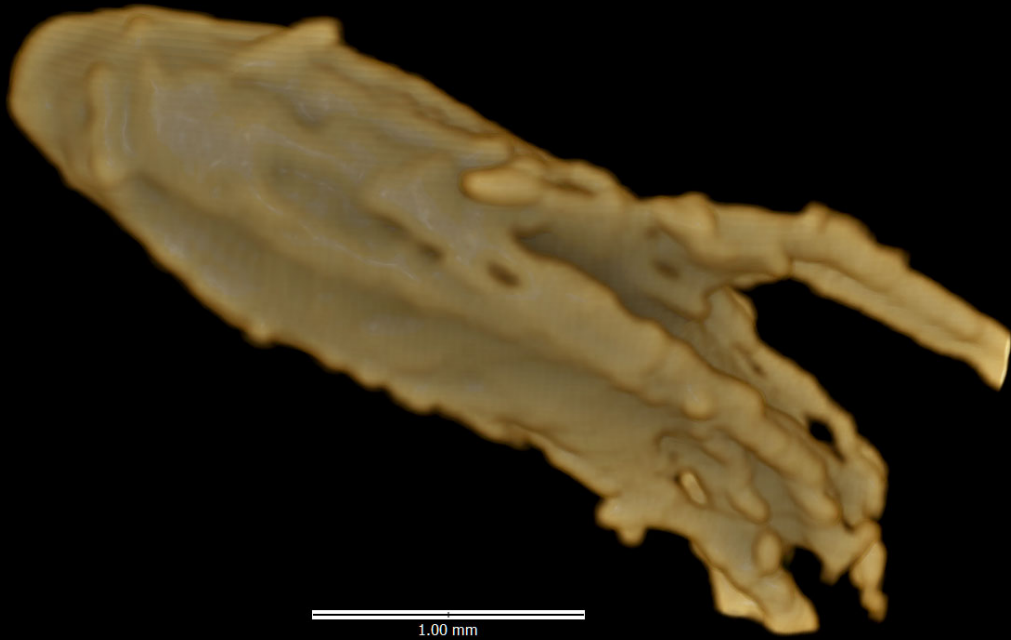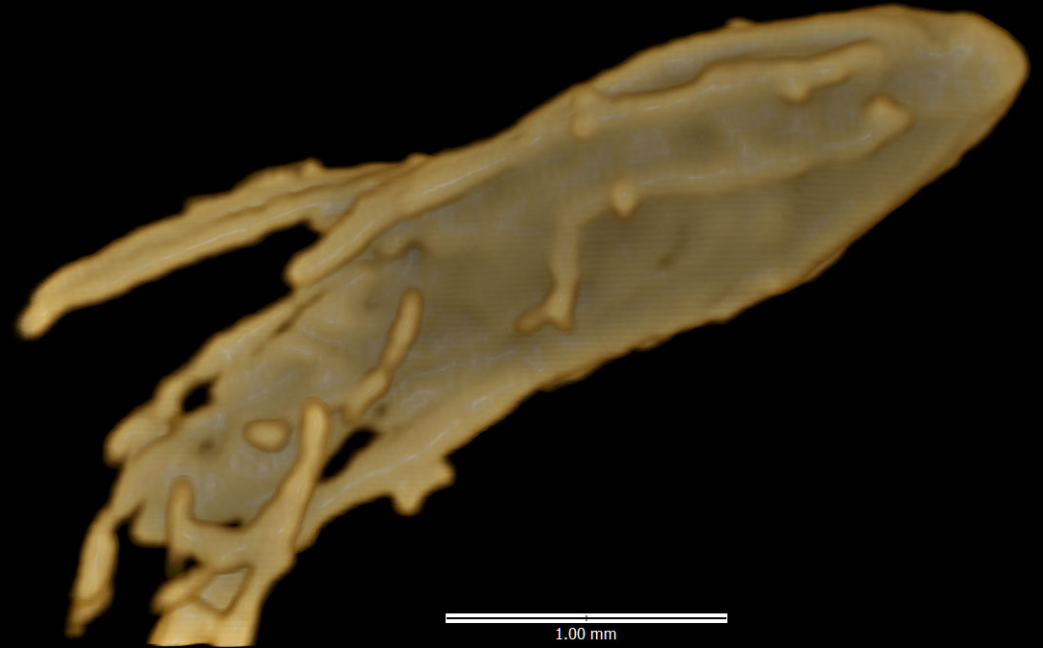

Inclusion 20. involucre, indeterminate attachment, solitary spikelet

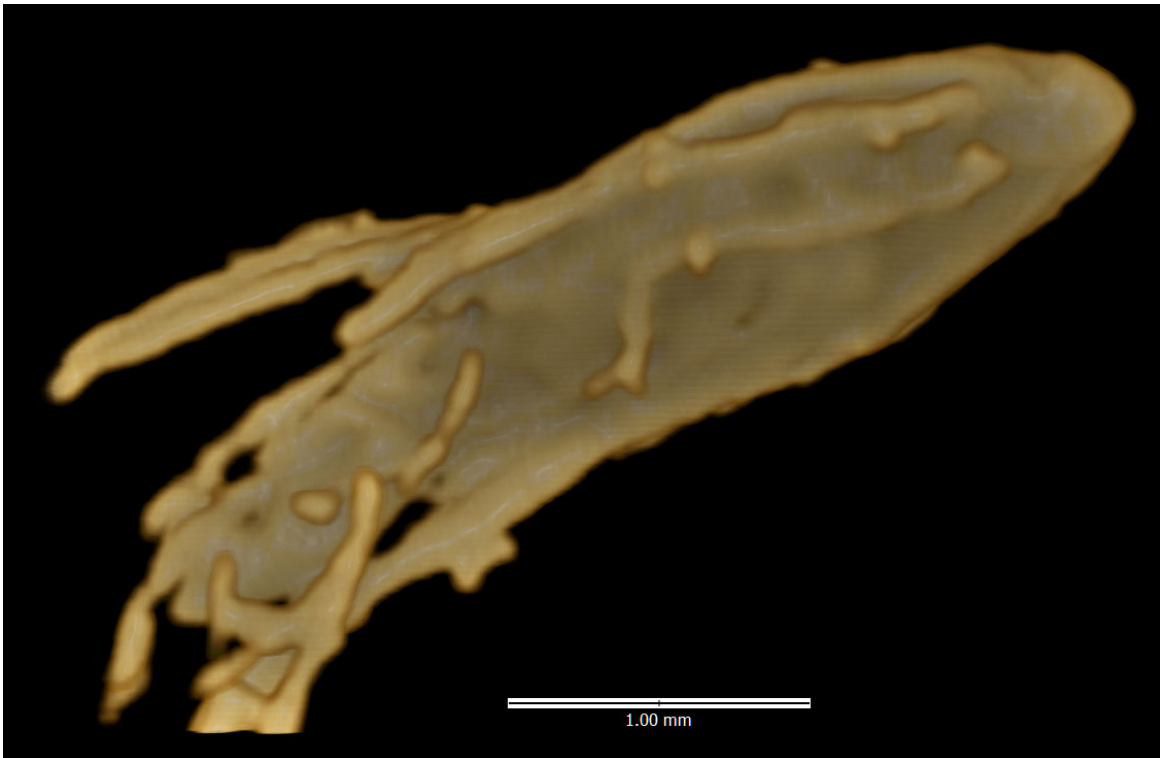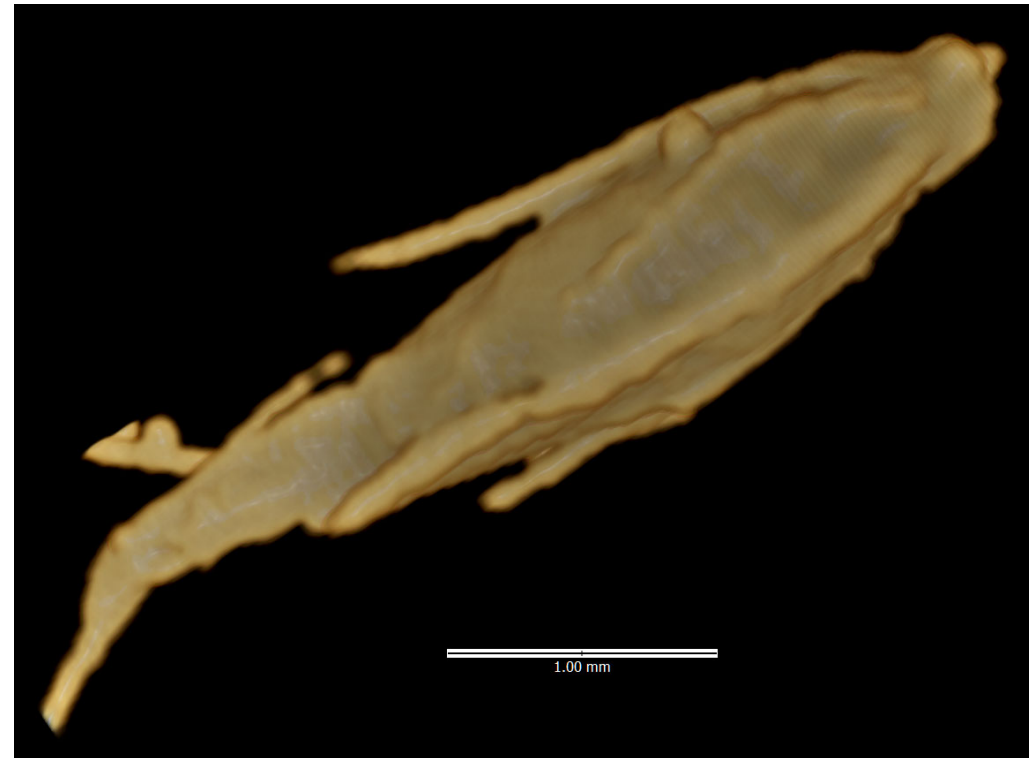

**Inclusion 21.** Two views: Sessile involucre(?), solitary spikelet. This specimen shows some elongation that could indicate formation of a peduncle, but it is within the range of likely variation in sessile specimens with some additional torn culm tissue (i.e. if harvested slightly green).

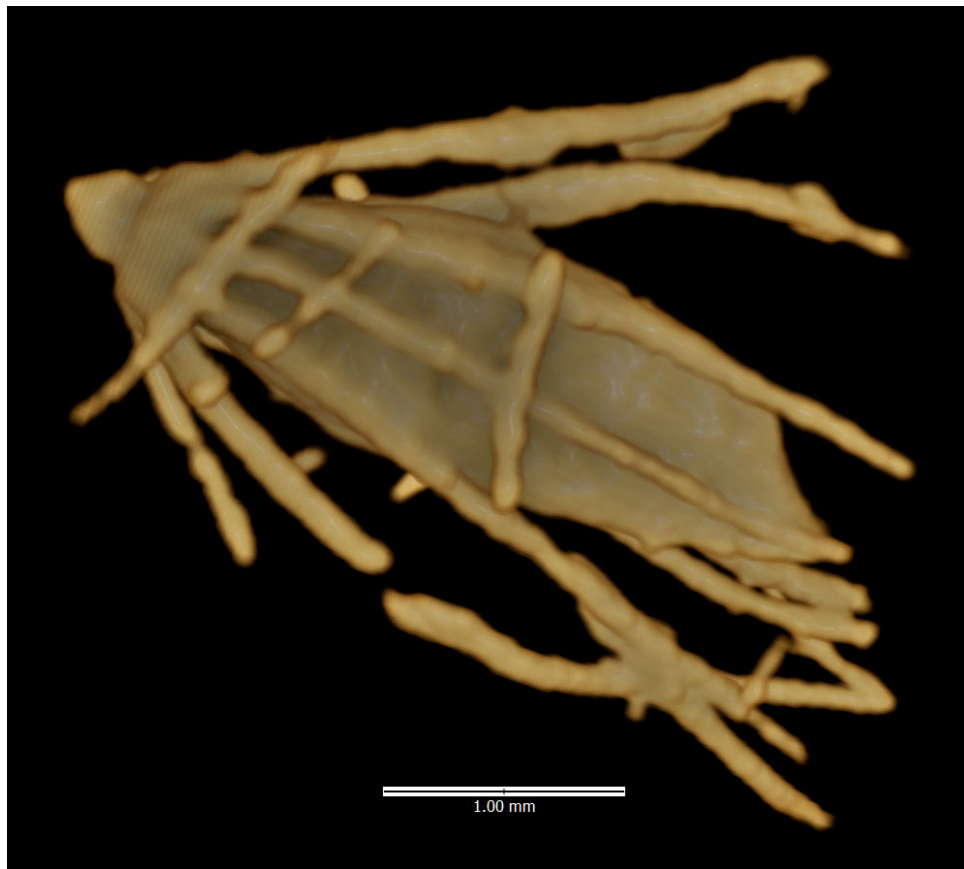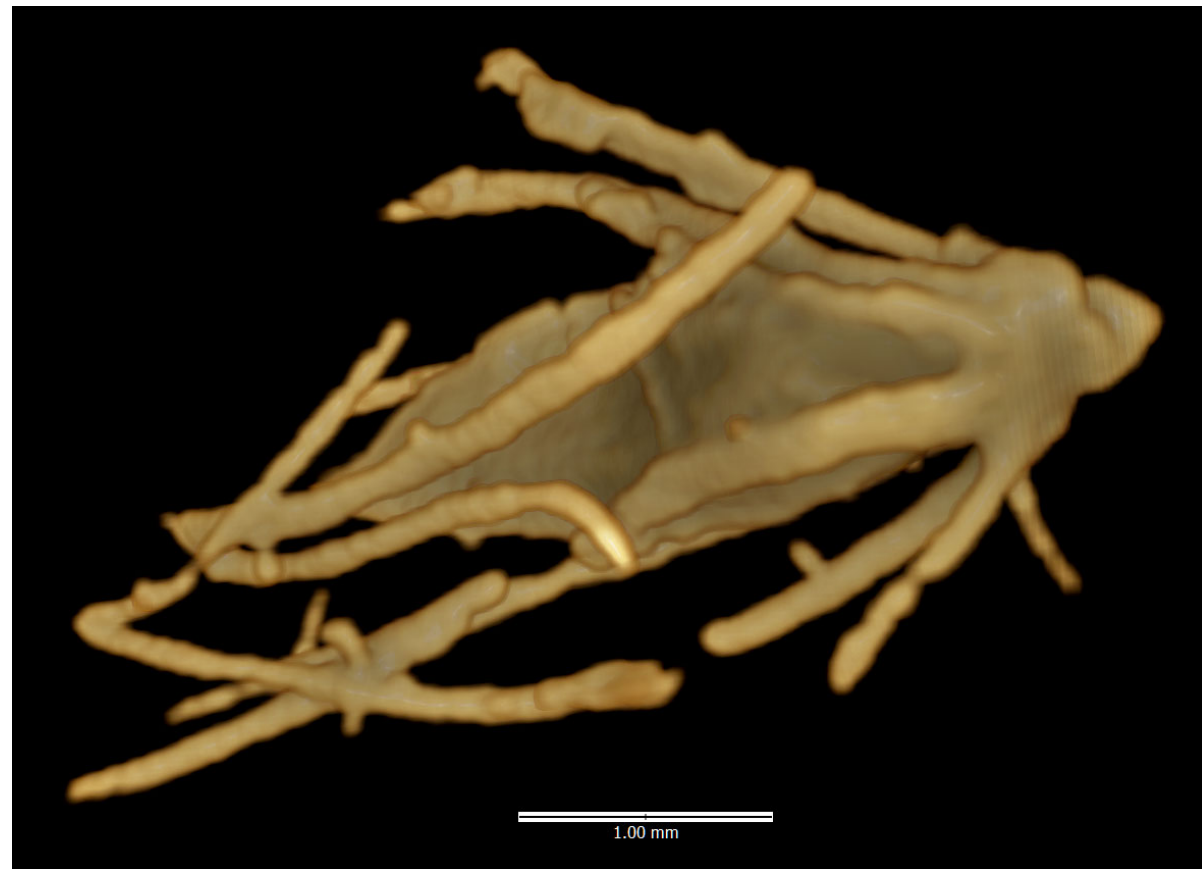



# Inclusion 22. Two views: Sessile involucre, solitary spikelet

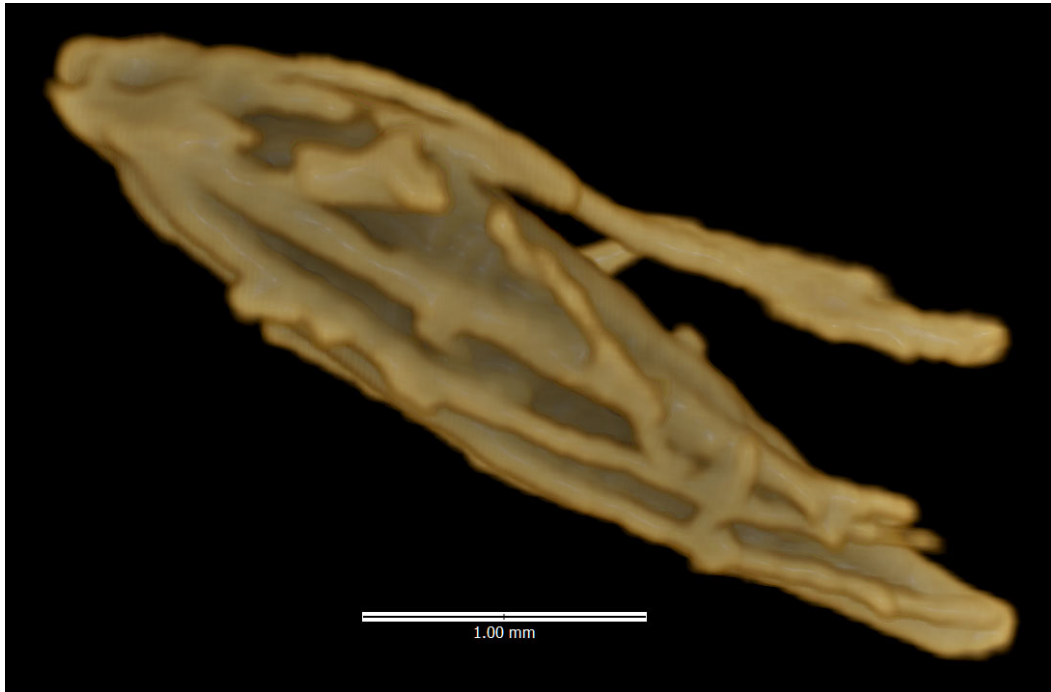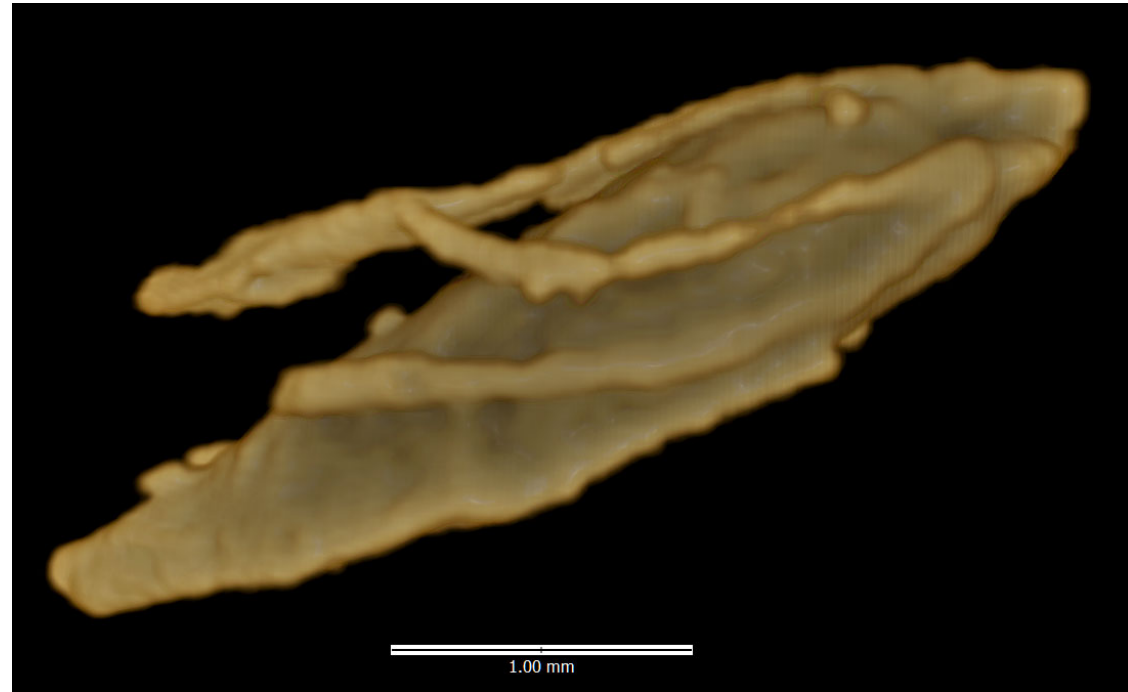

# Inclusion 23. Two views: Sessile involucre, solitary spikelet

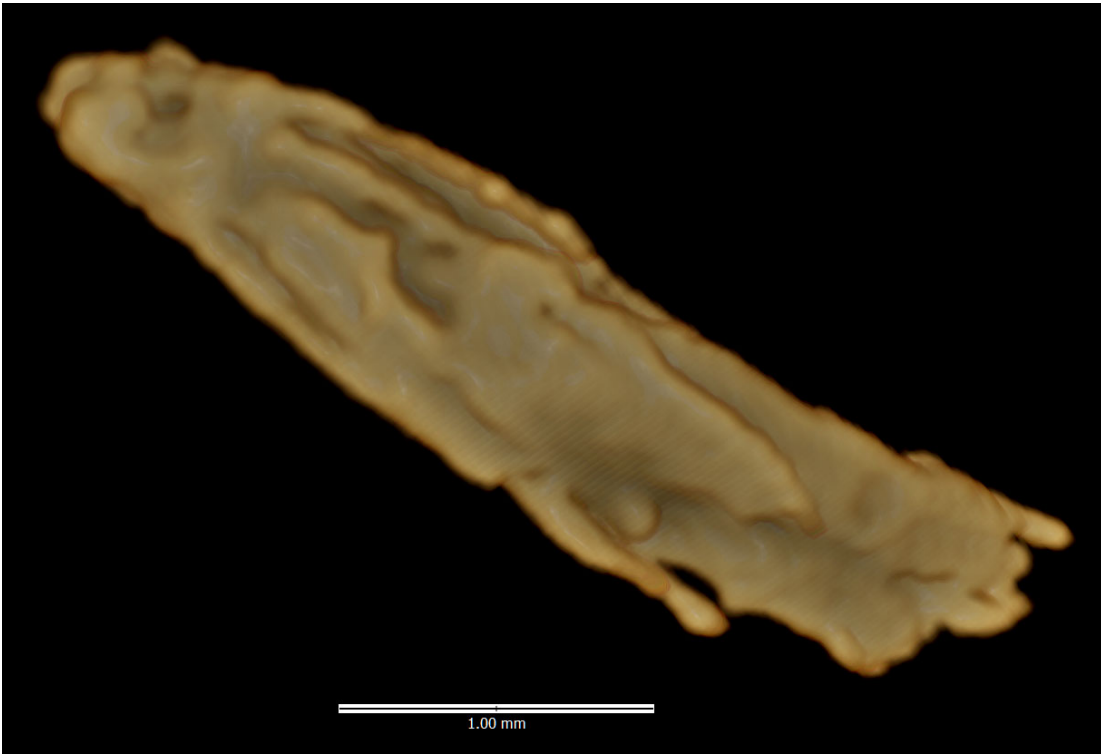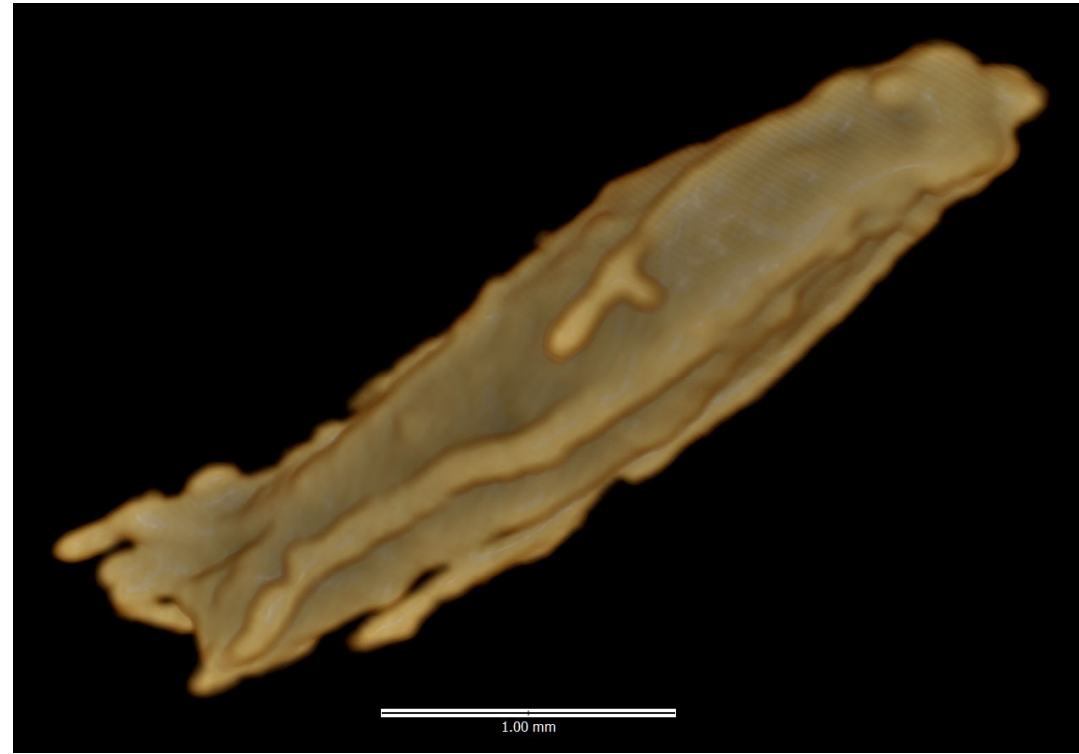

# Inclusion 24. Two views: Sessile involucre, solitary spikelet

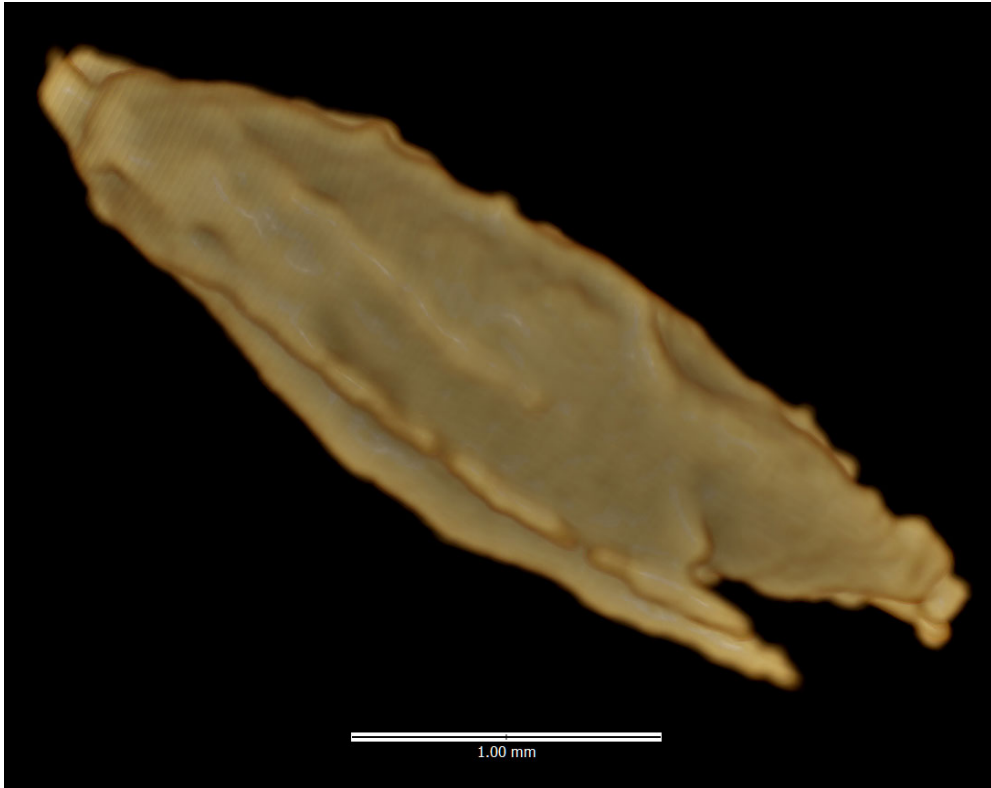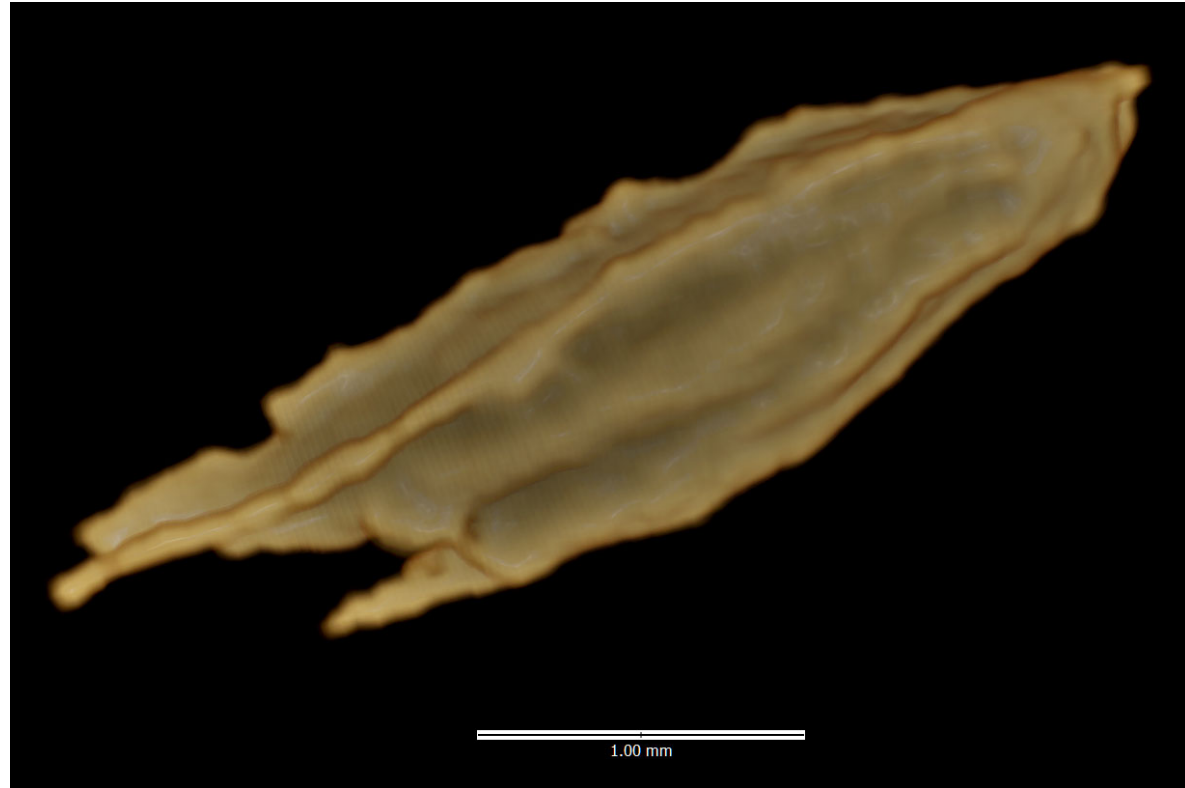

# Inclusion 25

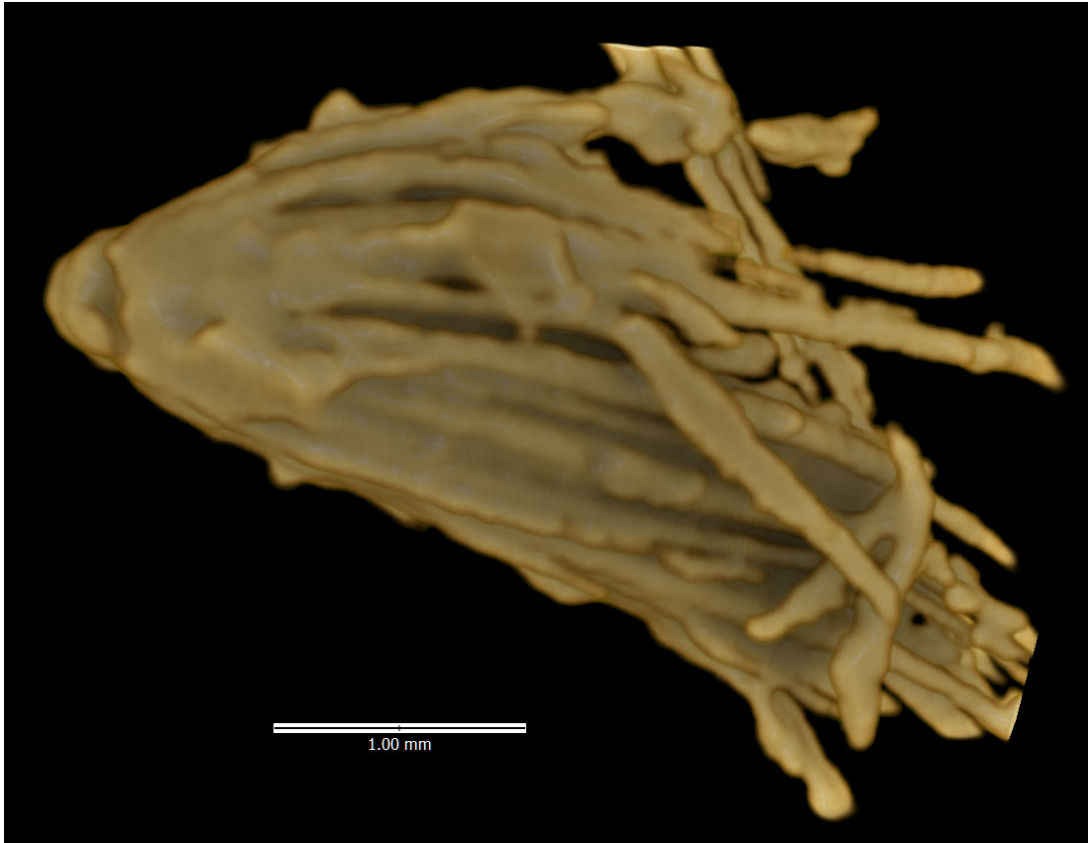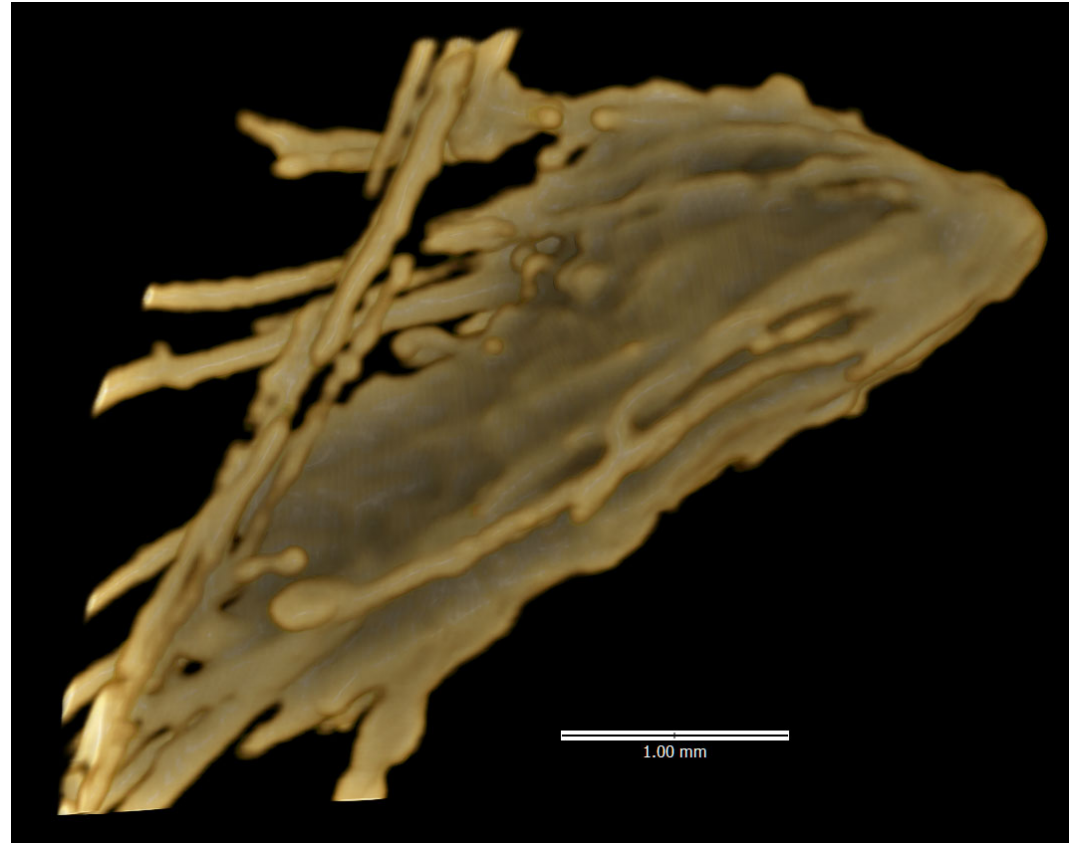

# Inclusion 26. Two views: Sessile involucre, solitary spikelet

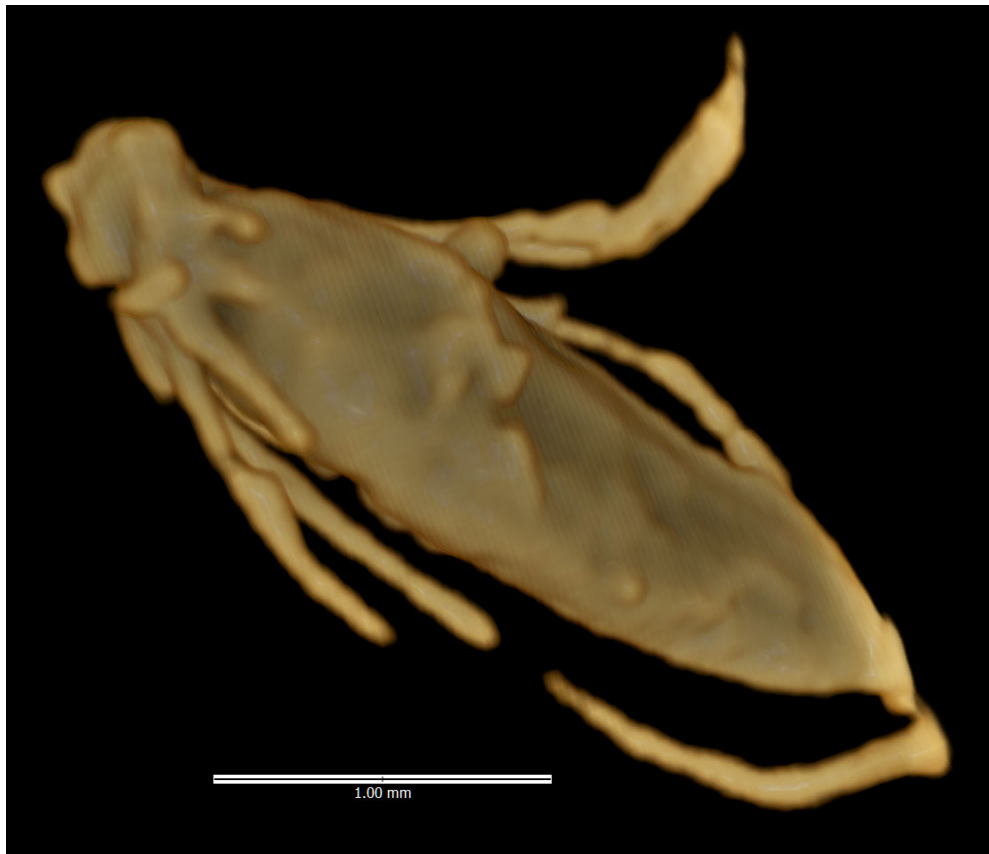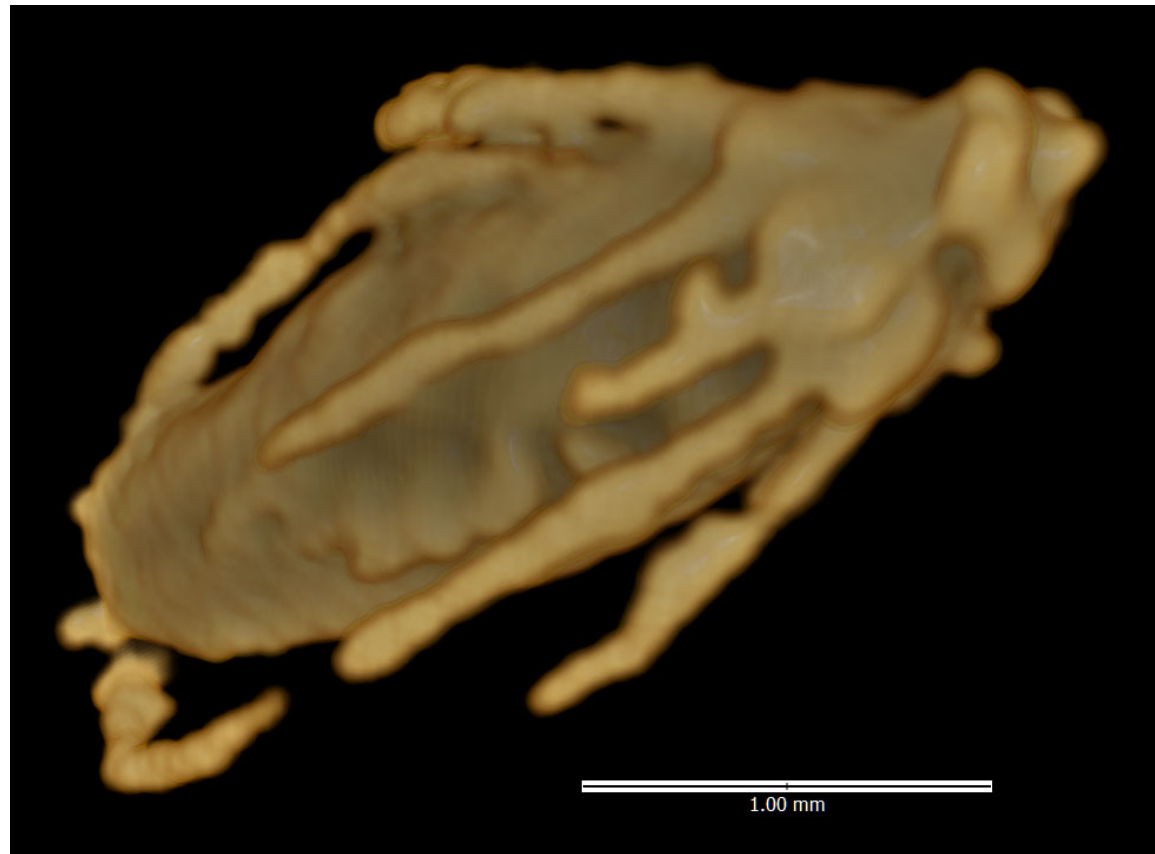

# Inclusion 27. Two views: Sessile involucre, solitary spikelet

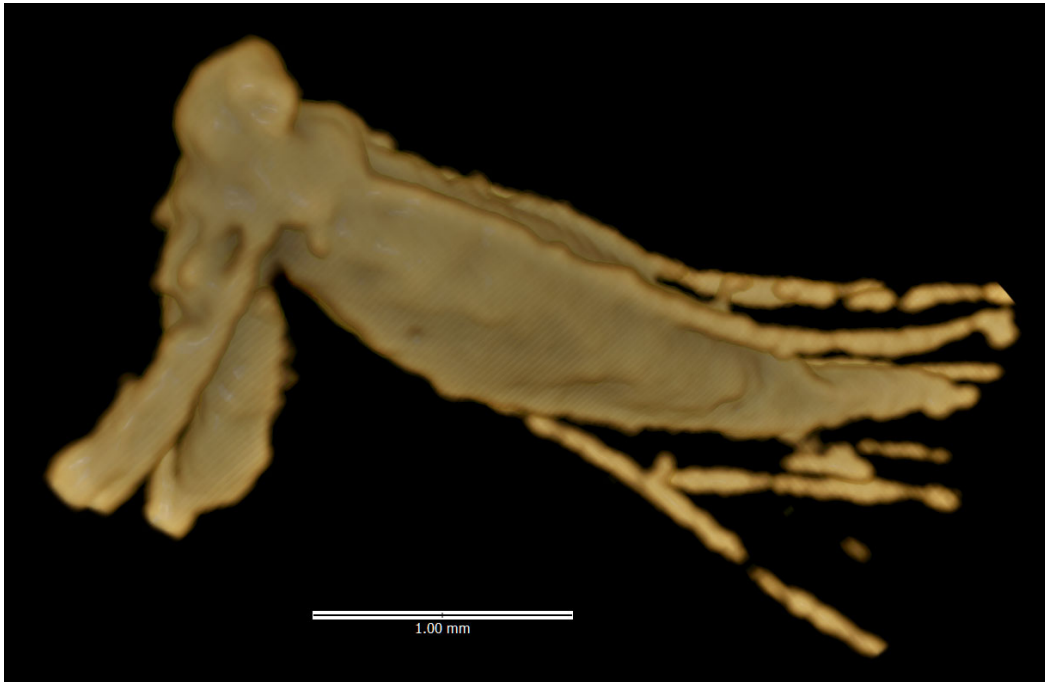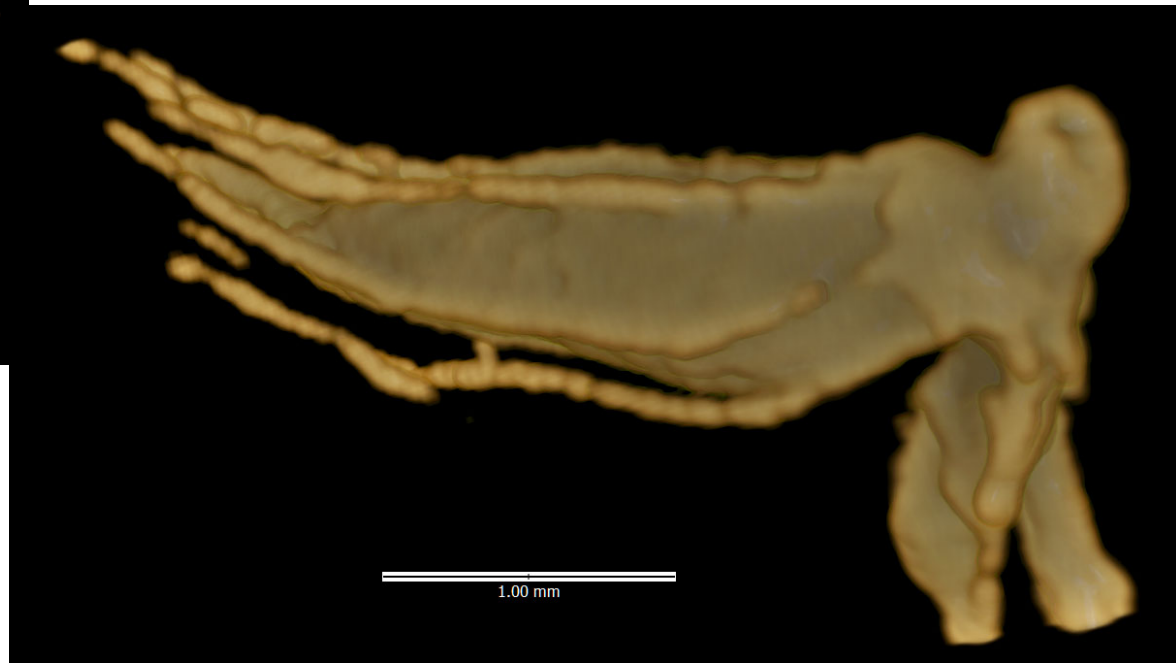

# Inclusion 28. Two views: Sessile involucre, solitary spikelet

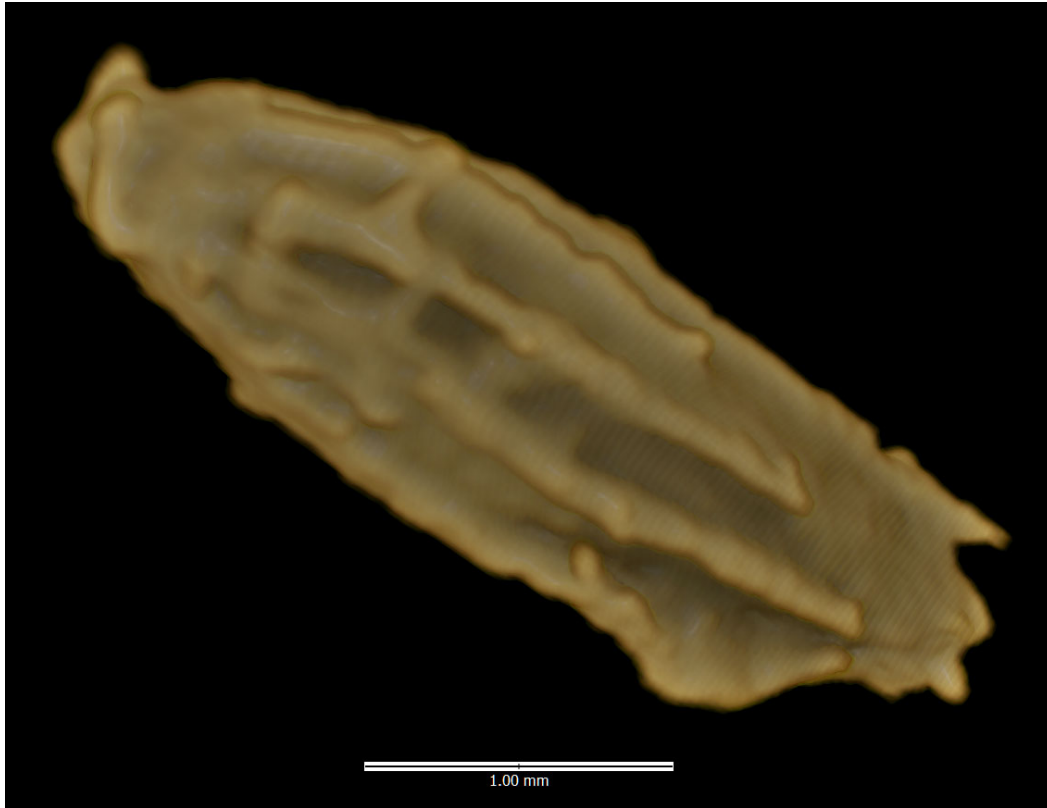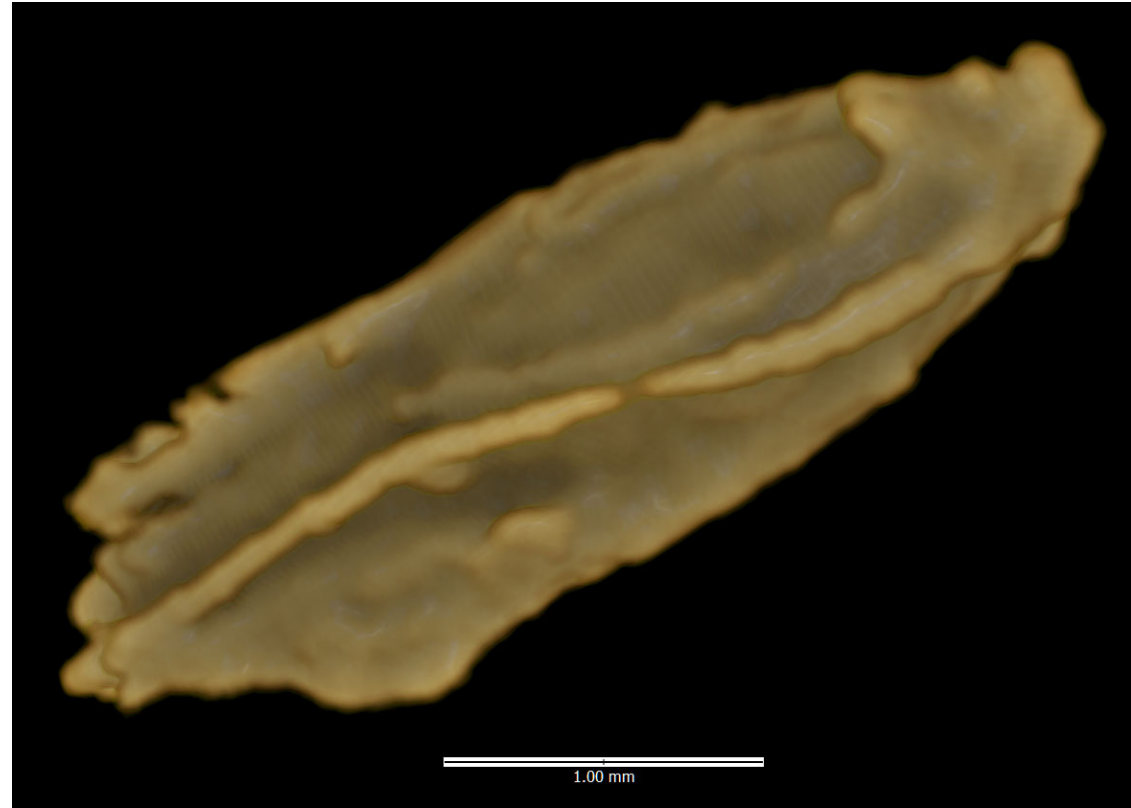

# Inclusion 29. Two views: Sessile involucre, solitary spikelet

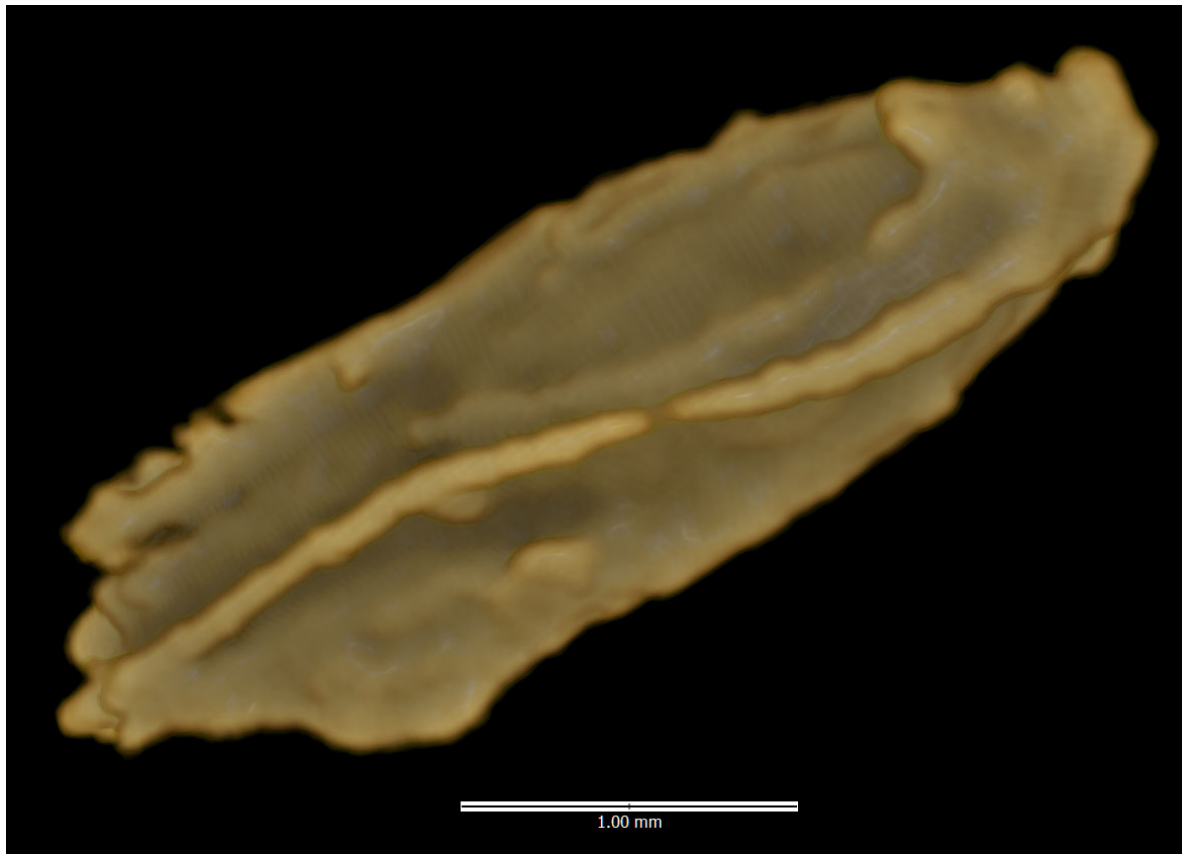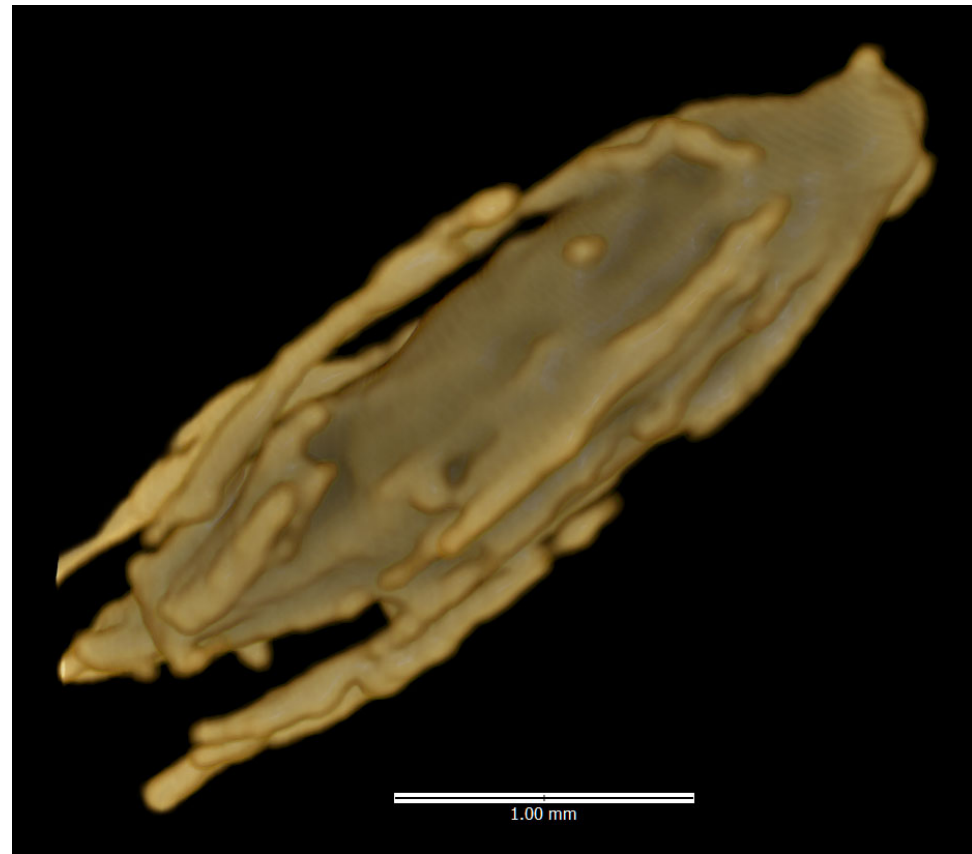



# Inclusion 30. Two views: Sessile involucre, solitary spikelet

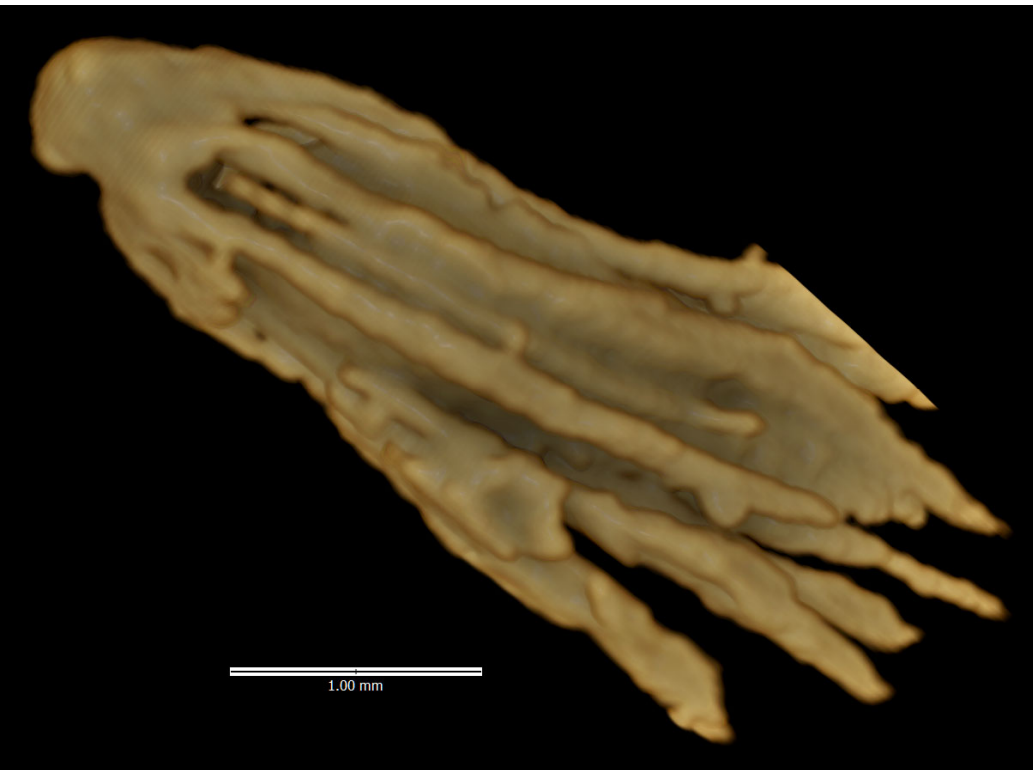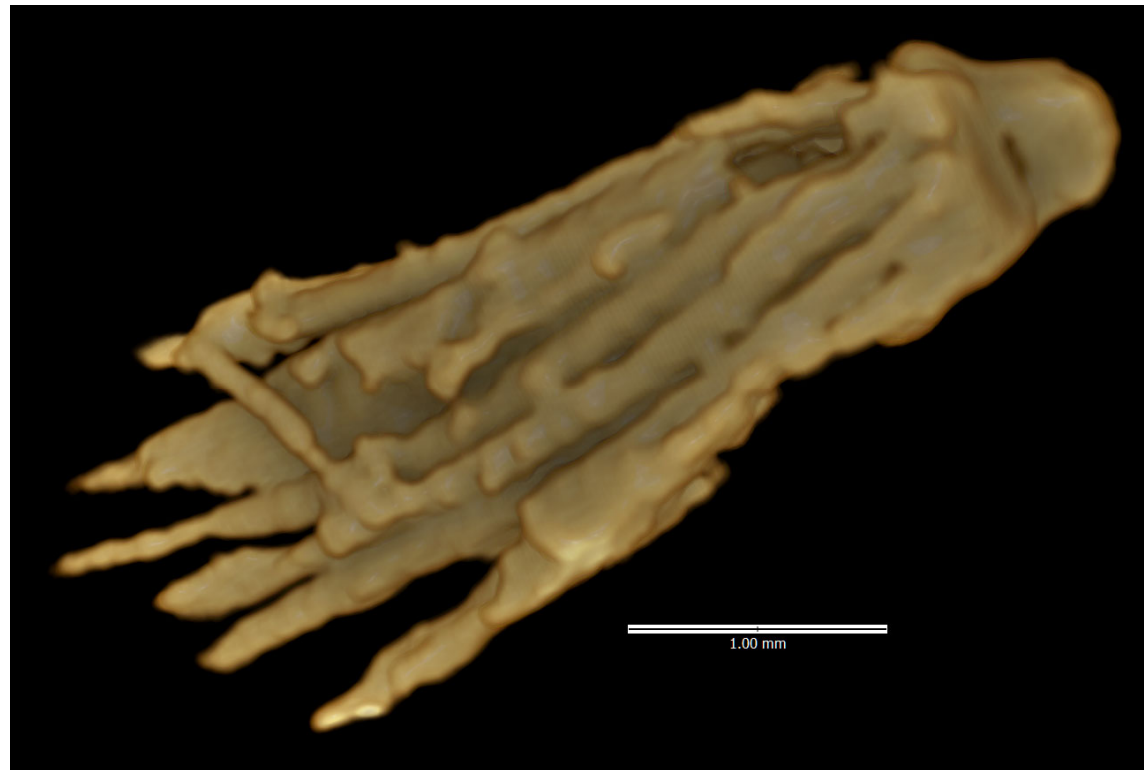

# Inclusion 32. Two views: involucre, indeterminate attachment, solitary spikelet

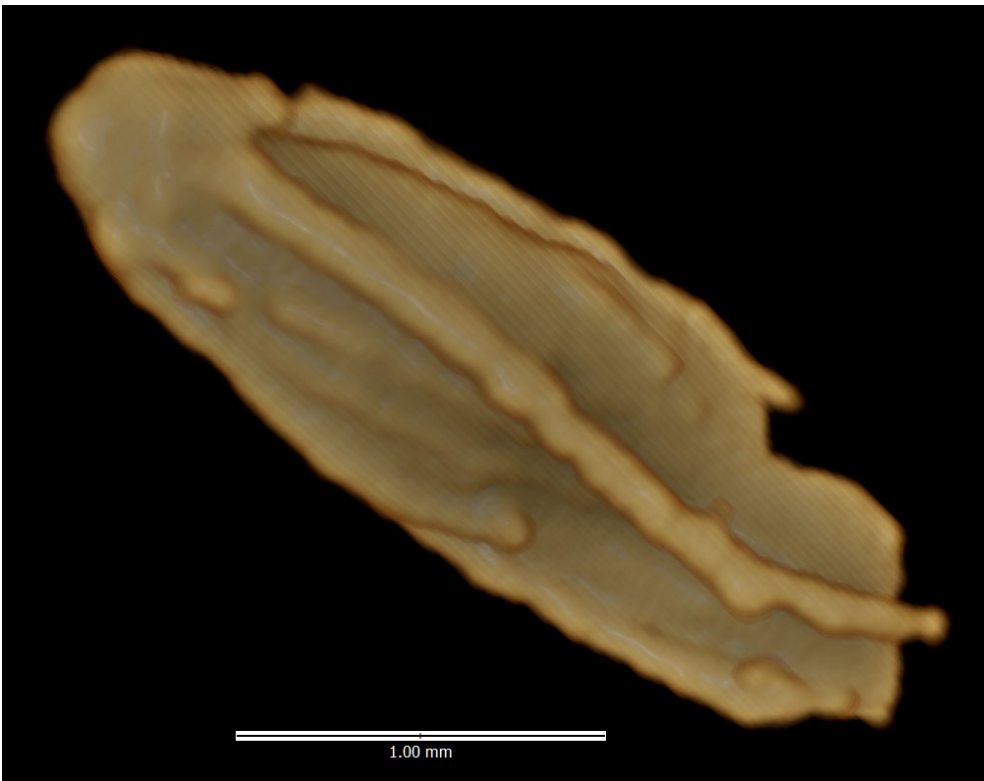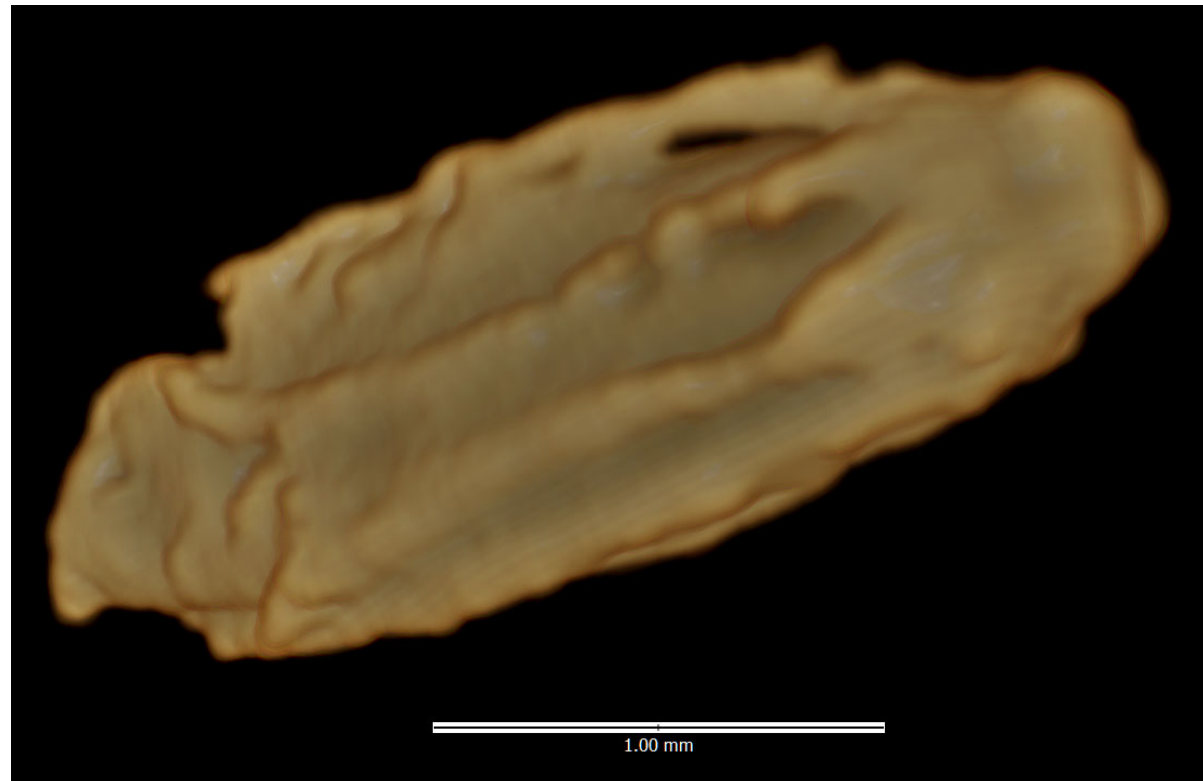

# Inclusion 33. Two views: Sessile involucre, solitary spikelet

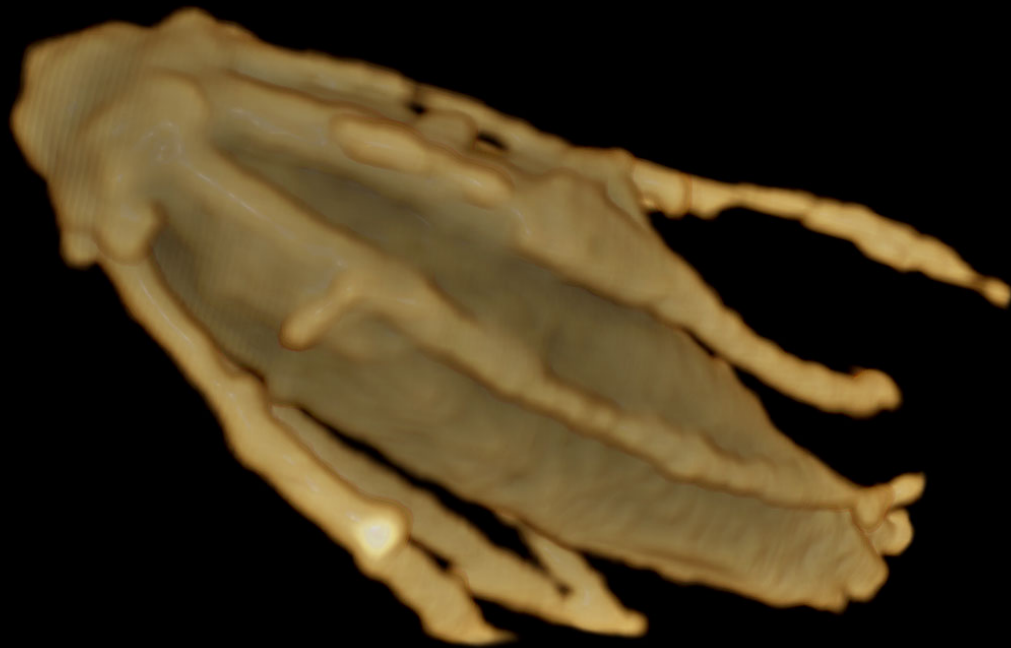

1.00 mm

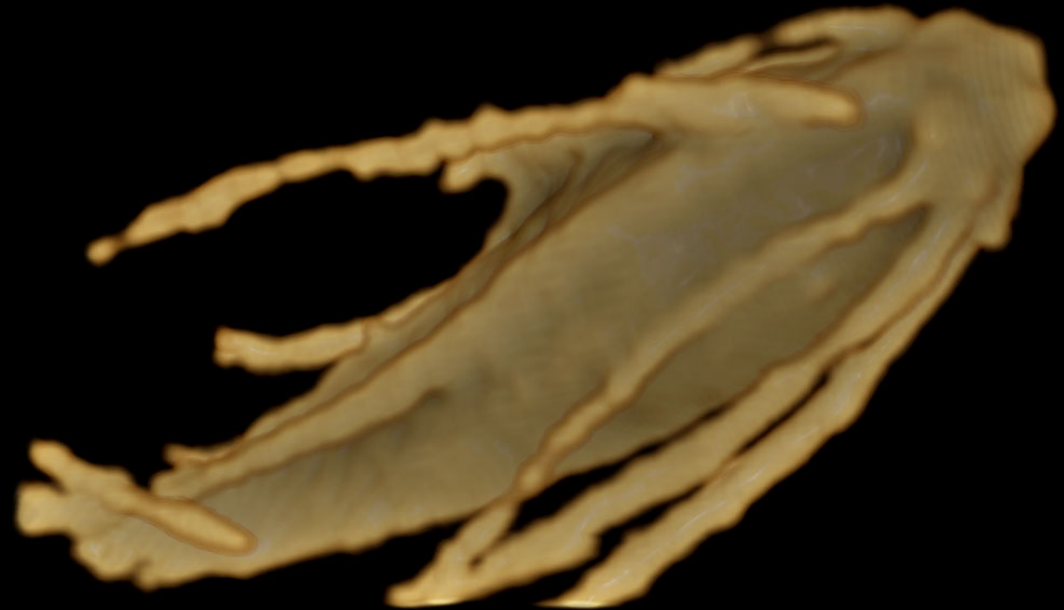

1.00 mm

# Inclusion 34. Two views: Sessile involucre, solitary spikelet

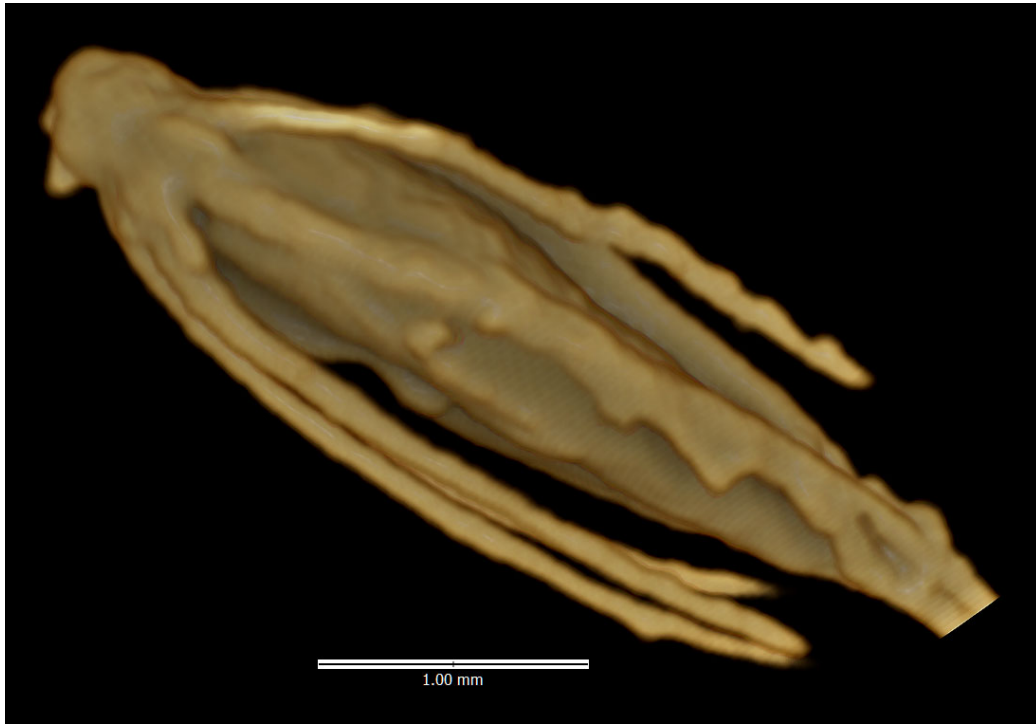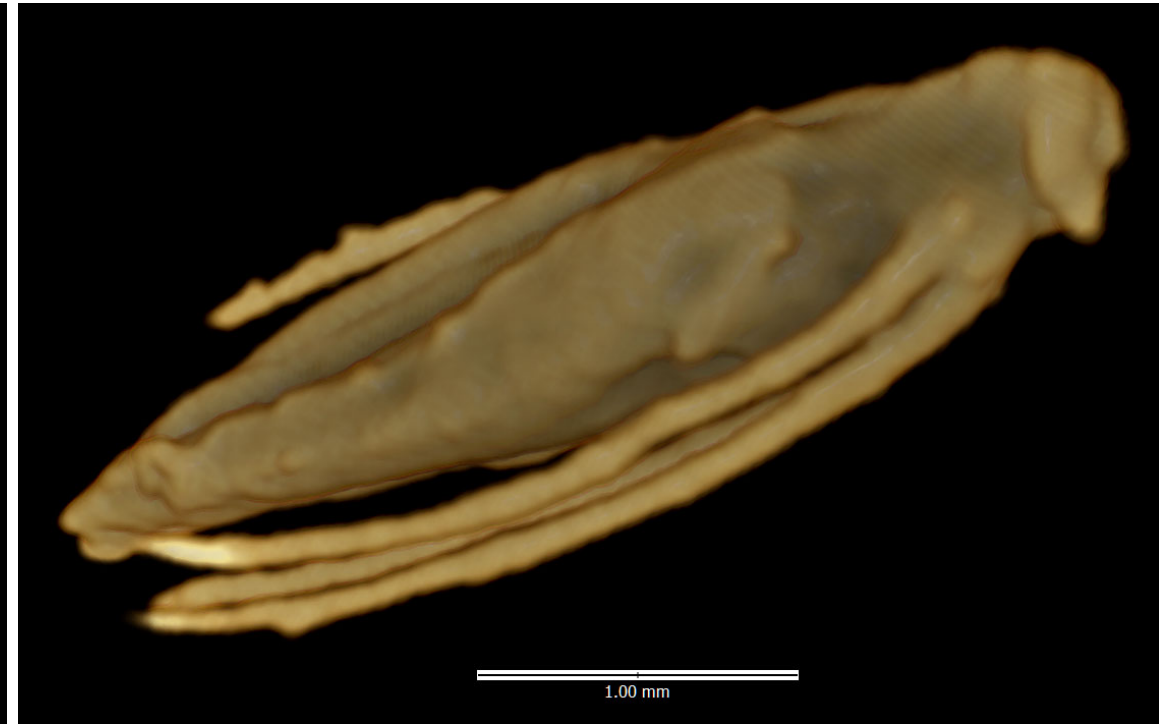

# Inclusion 35. Two views: Sessile involucre, solitary spikelet

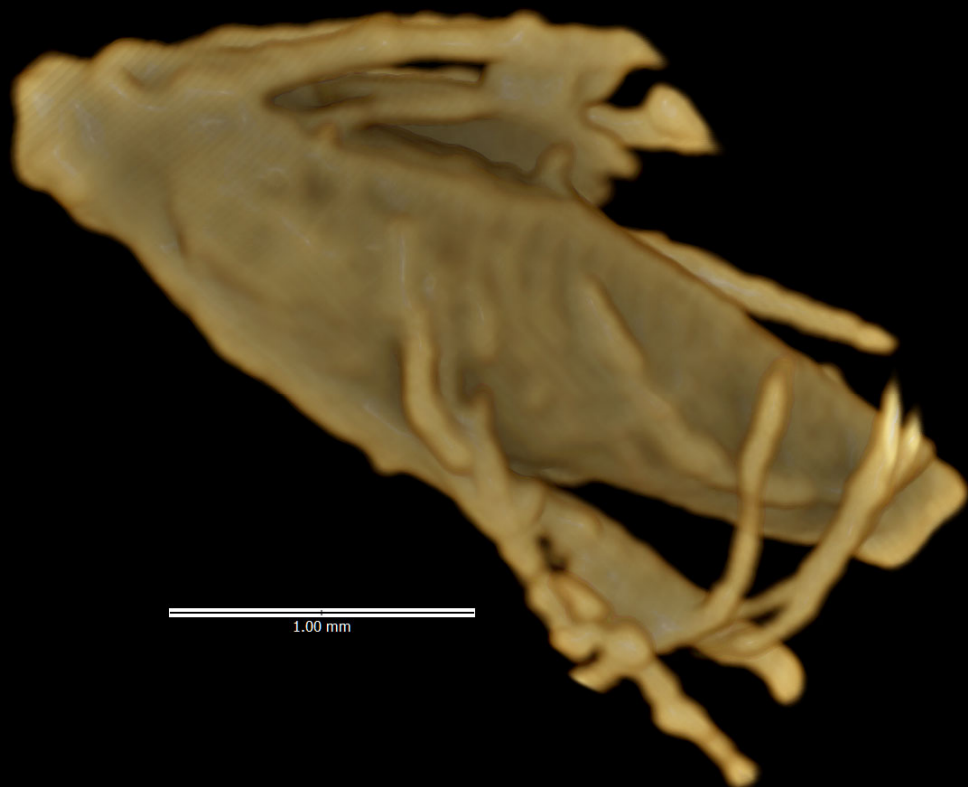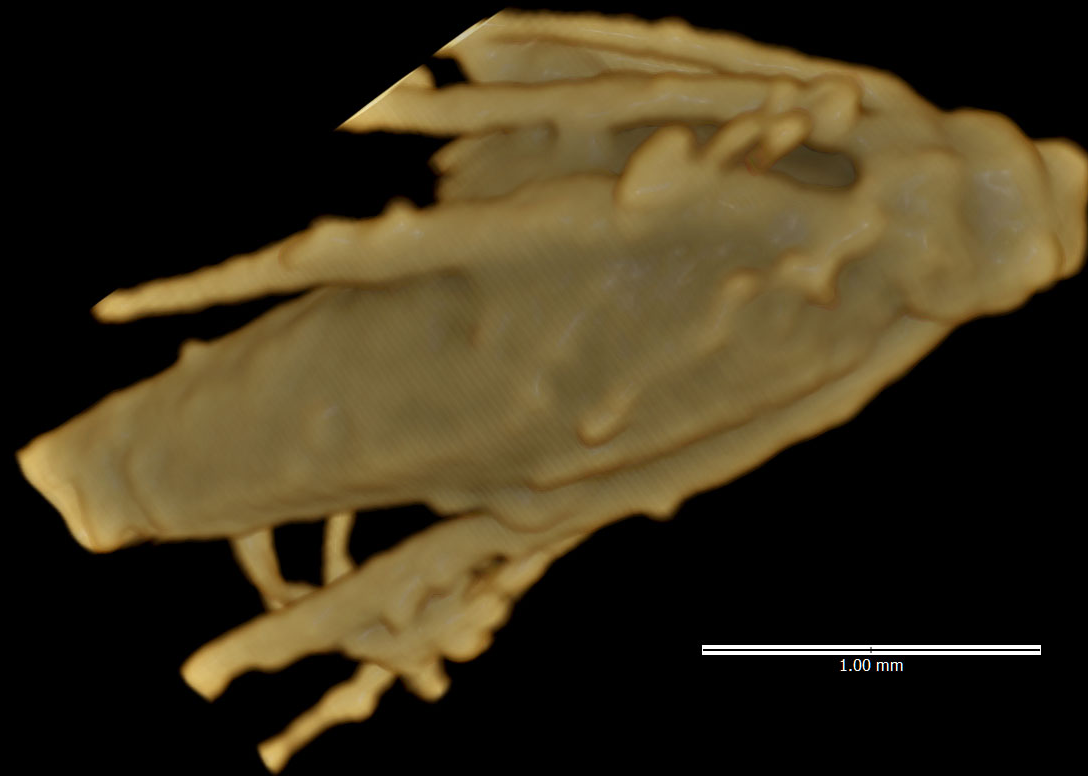

# Inclusion 36. Two views: Sessile involucre, solitary spikelet

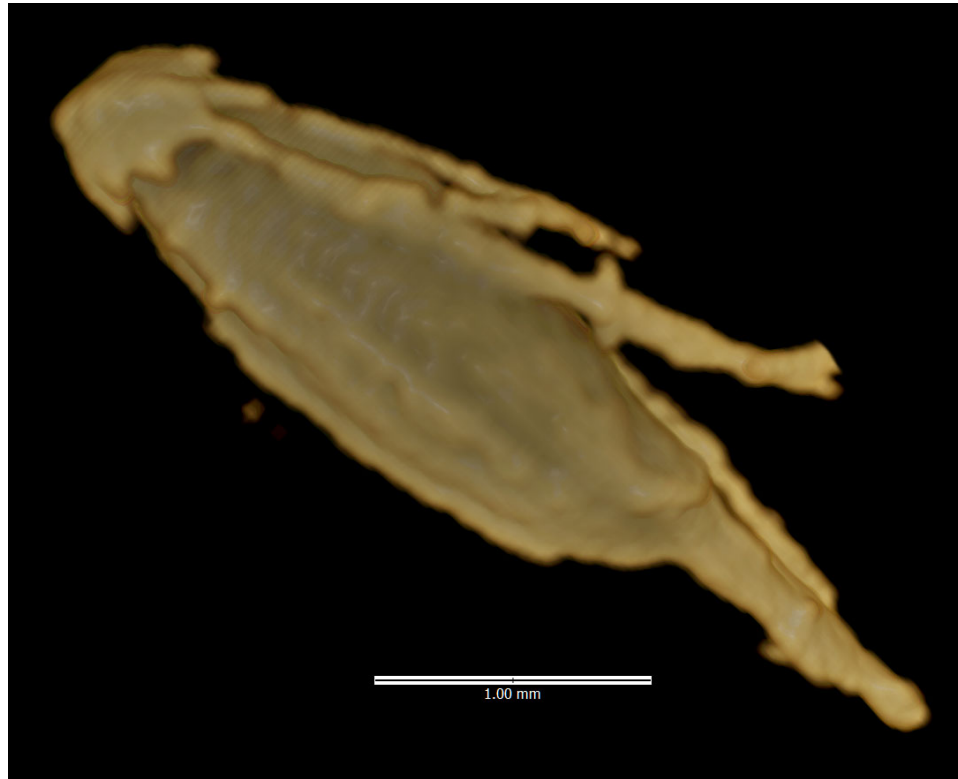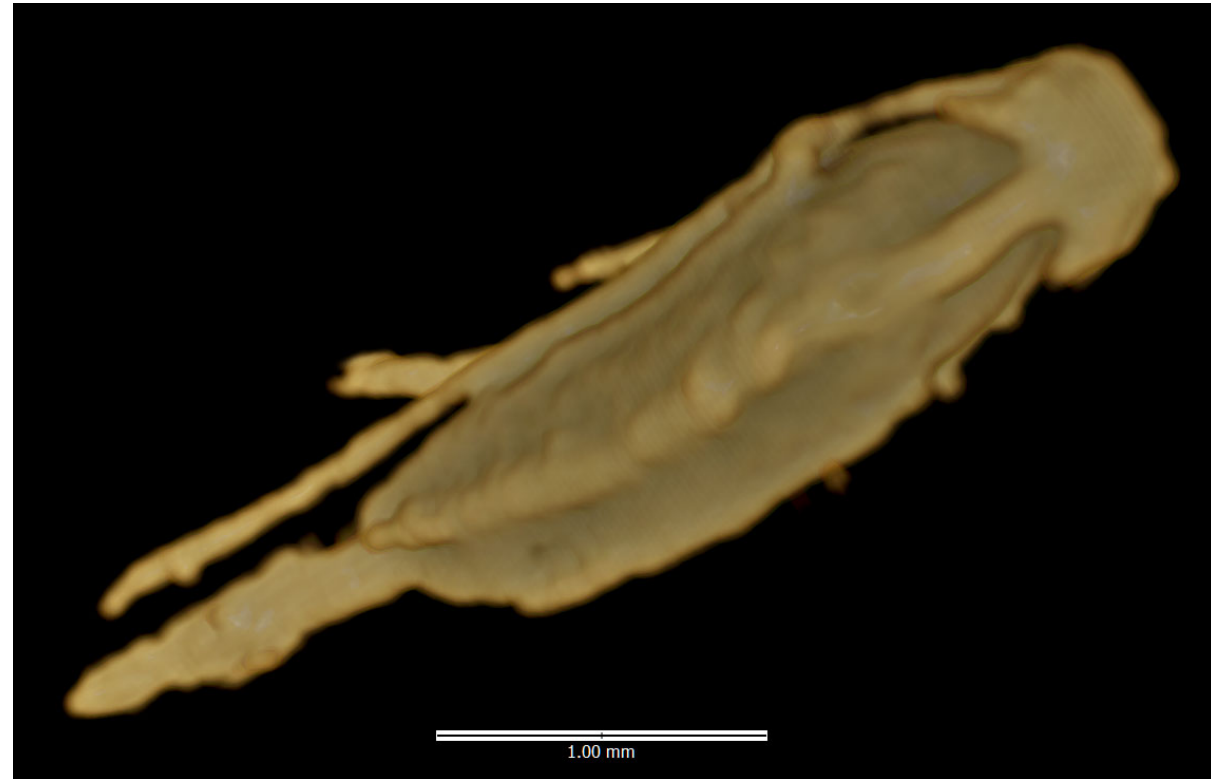

Supplement: 10437_2021_9428_MOESM2_ESM.pdf [file 10437_2021_9428_MOESM2_ESM.pdf]
